# Supplementary material for: Proteus: An algorithm for proposing stabilizing mutation pairs based on interactions observed in known protein 3D structures
Source: PubMed Central journal article supplement (PMC7330979; doi:10.1186/s12859-020-03575-6), 2020-07-01
Supplement: 12859_2020_3575_MOESM1_ESM.pdf [file 12859_2020_3575_MOESM1_ESM.pdf]

## Supplementary material

*“Proteus: An algorithm for proposing stabilizing mutation pairs based on interactions observed in known protein 3D structures”*

---

### Tables

|                                                                                                                                        |    |
|----------------------------------------------------------------------------------------------------------------------------------------|----|
| Table S1. Comparison of mutation tools. ....                                                                                           | 2  |
| Table S2. Fifty mutants suggested for the immunoglobulin (2YWY). ....                                                                  | 3  |
| Table S3. Sixty-one mutants suggested for the Protease (1LVB). ....                                                                    | 6  |
| Table S4. Two-hundred and thirteen mutants suggested for the Protease (1LGY). ....                                                     | 9  |
| Table S5. Three-hundred forty-four mutants suggested for the $\beta$ -glucosidase (hydrolase; 1BGA). ....                              | 20 |
| Table S6. Two-hundred seventy-two mutants suggested for the lysozyme (2LZM) used in the second case study. ....                        | 36 |
| Table S7. The total number of contacts for the wild protein and their 50 mutants of the immunoglobulin (2YWY). ....                    | 49 |
| Table S8. The total number of contacts for the wild protein and their 61 mutants of the Protease (1LVB). ....                          | 51 |
| Table S9. The total number of contacts for the wild protein and their 213 mutants of the Protease (1LGY). ....                         | 53 |
| Table S10. The total number of contacts for the wild protein and their 344 mutants of the $\beta$ -glucosidase (hydrolase; 1BGA). .... | 59 |
| Table S11. List of stabilizing mutations for the PDB: 2LZM collected from ProTherm. ....                                               | 68 |

Table S1. Comparison of mutation tools.

| TOOL               | INPUT      | DESCRIPTION                                                                                                                                                                    | REFERENCE                          |
|--------------------|------------|--------------------------------------------------------------------------------------------------------------------------------------------------------------------------------|------------------------------------|
| <b>PROTEUS</b>     | Structures | Suggests mutation pairs based on known structures found in PDB.                                                                                                                | -                                  |
| <b>SSBOUND</b>     | Structures | Inserts new disulfide bonds, which could improve the thermostability.                                                                                                          | (Hazes and Dijkstra, 1988)         |
| <b>MODIP</b>       | Structures | It uses a classification system based on conformation parameters for disulfide bonds.                                                                                          | (Sowdhamini <i>et al.</i> , 1989)  |
| <b>MUSTAB</b>      | Sequence   | Uses machine learning to predict protein stability changes upon amino acid substitutions.                                                                                      | (Teng <i>et al.</i> , 2010)        |
| <b>IPTREE-STAB</b> | Sequence   | Predicts protein stability changes ( $\Delta\Delta G$ ) upon single amino acid substitutions.                                                                                  | (Huang <i>et al.</i> , 2007)       |
| <b>POPMUSIC</b>    | Structures | Predicts thermodynamic stability changes using a linear combination of statistical potentials based on the solvent accessibility of the mutated residue.                       | (Dehouck <i>et al.</i> , 2011)     |
| <b>SDM</b>         | Structures | uses substitution probability tables obtained from known 3-D structures to analyze the variation of amino acid replacements tolerated within the family of homologous proteins | (Pandurangan <i>et al.</i> , 2017) |
| <b>DUET</b>        | Structures | Combines the methods SDM and mCSM in a hybrid approach to try to obtain a more accurate prediction of $\Delta\Delta G$ .                                                       | (Pires <i>et al.</i> , 2014a)      |
| <b>MCSM</b>        | Structures | mCSM uses graph-based signatures and pharmacophore properties in a machine learning approach to predict stabilizing and destabilizing mutations.                               | (Pires <i>et al.</i> , 2014b)      |
| <b>SSV</b>         | Structures | SSV uses graph-based structural signatures and compares Euclidian distances between vectors to predict if mutations insert similar characteristics to reference proteins.      | (Mariano <i>et al.</i> , 2019)     |
| <b>MAESTRO</b>     | Structures | Combines high throughput scanning for multi-point mutations, prediction of free energy change ( $\Delta\Delta G$ ) values, and stabilizing disulfide bonds.                    | (Laimer <i>et al.</i> , 2015)      |

**Table S2. Fifty mutants suggested for the immunoglobulin (2YWY).**

Proteus ID: UM6SQD. Available at <<http://proteus.dcc.ufmg.br/result/id/UM6SQD>>.

| Mutation   | Template             | Chain | R1   | R2   | RMSD | $\Delta\Delta G$ | Clash |
|------------|----------------------|-------|------|------|------|------------------|-------|
| E57H/F66T  | <a href="#">4r7k</a> | C     | H115 | T131 | 0.46 | 2.601            | No    |
| E57N/F66S  | <a href="#">1c27</a> | A     | N95  | S110 | 0.35 | 4.303            | No    |
| E57Q/F66T  | <a href="#">1h1i</a> | B     | Q83  | T95  | 0.39 | 2.649            | No    |
| E57S/L68T  | <a href="#">3oh8</a> | A     | S6   | T106 | 0.26 | 3.624            | No    |
| F87Q/E101S | <a href="#">4wm8</a> | B     | Q111 | S231 | 0.47 | 3.852            | No    |
| G15S/R74Q  | <a href="#">3v6o</a> | D     | S17  | Q88  | 0.38 | 0.746            | No    |
| I20T/I70K  | <a href="#">1naq</a> | A     | T41  | K67  | 0.45 | 4.326            | No    |
| K12E/L108Q | <a href="#">1uqt</a> | B     | E261 | Q294 | 0.45 | 3.595            | No    |
| L18S/L73S  | <a href="#">2ial</a> | C     | S18  | S76  | 0.42 | 4.617            | No    |
| L18W/I70Q  | <a href="#">4h3l</a> | A     | W93  | Q109 | 0.44 | 3.597            | No    |
| L31E/A85D  | <a href="#">5fgp</a> | A     | E43  | D59  | 0.4  | 3.537            | No    |
| L31S/A85D  | <a href="#">3sc7</a> | X     | S366 | D509 | 0.48 | 4.284            | No    |
| Q5E/I20N   | <a href="#">2ofc</a> | B     | E113 | N121 | 0.5  | 4.086            | No    |
| Q5K/I20R   | <a href="#">4cb6</a> | B     | K339 | R355 | 0.47 | 2.694            | No    |
| Q5N/C22S   | <a href="#">3o4l</a> | L     | N161 | S177 | 0.3  | 3.307            | No    |
| Q5S/C22T   | <a href="#">3oh8</a> | A     | S6   | T106 | 0.48 | 3.007            | No    |
| Q5T/I20H   | <a href="#">3fe4</a> | A     | T214 | H229 | 0.45 | 2.84             | No    |
| Q5T/I20N   | <a href="#">3lw2</a> | A     | T93  | N167 | 0.46 | 3.441            | No    |
| R38H/I49N  | <a href="#">5f9o</a> | H     | H35  | N99  | 0.49 | 2.196            | No    |
| T11H/T109R | <a href="#">4kpl</a> | D     | H124 | R149 | 0.46 | 0.02             | No    |
| T11K/T109H | <a href="#">4jl1</a> | A     | K130 | H176 | 0.49 | 0.581            | No    |

| Mutation   | Template             | Chain | R1   | R2   | RMSD | $\Delta\Delta G$ | Clash |
|------------|----------------------|-------|------|------|------|------------------|-------|
| T11N/K111T | <a href="#">3ecj</a> | B     | N157 | T205 | 0.46 | 0.458            | No    |
| T11S/K111Q | <a href="#">4xk2</a> | A     | S85  | Q126 | 0.28 | 0.144            | No    |
| T19E/R69N  | <a href="#">3sys</a> | A     | E343 | N369 | 0.32 | 1.184            | No    |
| T19E/S67N  | <a href="#">2ofc</a> | B     | E113 | N121 | 0.48 | 1.669            | No    |
| T19K/R69K  | <a href="#">1get</a> | B     | K372 | K392 | 0.48 | 1.921            | No    |
| T19N/R69S  | <a href="#">3o4l</a> | L     | N161 | S177 | 0.29 | 1.524            | No    |
| T19S/R69T  | <a href="#">3oh8</a> | A     | S6   | T106 | 0.44 | 0.913            | No    |
| T34K/A85K  | <a href="#">1get</a> | B     | K372 | K392 | 0.29 | 2.168            | No    |
| T34N/A85S  | <a href="#">3o4l</a> | L     | N161 | S177 | 0.32 | 2.77             | No    |
| T58S/S67Y  | <a href="#">1juh</a> | D     | S105 | Y215 | 0.37 | 0.261            | No    |
| T80S/V107T | <a href="#">3oh8</a> | A     | S6   | T106 | 0.45 | 1.778            | No    |
| T80S/V107Y | <a href="#">1k8k</a> | D     | S166 | Y222 | 0.4  | 1.863            | No    |
| T80W/V107D | <a href="#">2v8h</a> | C     | W251 | D320 | 0.48 | 2.411            | No    |
| T80W/V107H | <a href="#">2qqz</a> | A     | W49  | H58  | 0.49 | 1.411            | No    |
| V3N/C22S   | <a href="#">1c27</a> | A     | N95  | S110 | 0.44 | 4.414            | No    |
| V3S/L24T   | <a href="#">3oh8</a> | A     | S6   | T106 | 0.41 | 4.368            | No    |
| V56E/R69Q  | <a href="#">1cpn</a> | A     | E51  | Q61  | 0.46 | 1.862            | No    |
| V56N/R71K  | <a href="#">3c46</a> | A     | N655 | K665 | 0.47 | 1.416            | No    |
| V59E/F66N  | <a href="#">3sys</a> | A     | E343 | N369 | 0.42 | 3.536            | No    |
| V59N/F66S  | <a href="#">3o4l</a> | L     | N161 | S177 | 0.48 | 3.682            | No    |
| W36D/Y81K  | <a href="#">1gd1</a> | R     | D241 | K306 | 0.34 | 4.48             | No    |
| W36H/C83K  | <a href="#">1yi7</a> | A     | H133 | K139 | 0.47 | 4.107            | No    |
| W36S/C83T  | <a href="#">3oh8</a> | A     | S6   | T106 | 0.47 | 4.376            | No    |

| Mutation   | Template             | Chain | R1   | R2   | RMSD | $\Delta\Delta G$ | Clash |
|------------|----------------------|-------|------|------|------|------------------|-------|
| W36T/Y81N  | <a href="#">3lw2</a> | A     | T93  | N167 | 0.34 | 4.515            | No    |
| Y37Q/E46Q  | <a href="#">2f3q</a> | A     | Q168 | Q175 | 0.49 | 3.175            | No    |
| Y37Q/K102E | <a href="#">2ic2</a> | A     | Q501 | E561 | 0.33 | 2.885            | No    |
| Y55H/I70N  | <a href="#">4qbu</a> | A     | H59  | N87  | 0.41 | 4.164            | No    |
| Y55N/L68T  | <a href="#">4dol</a> | A     | N163 | T180 | 0.37 | 4.262            | No    |
| Y86S/G100T | <a href="#">3oh8</a> | A     | S6   | T106 | 0.45 | 3.776            | No    |

Showing 1 to 50 of 50 entries

**Table S3. Sixty-one mutants suggested for the Protease (1LVB).**

Proteus ID: N7Q9RZ. Available at <<http://proteus.dcc.ufmg.br/result/id/N7Q9RZ>>.

| Mutation    | Template             | Chain | R1    | R2    | RMSD | $\Delta\Delta G$ | Clash |
|-------------|----------------------|-------|-------|-------|------|------------------|-------|
| Q58W/V63H   | <a href="#">2qqz</a> | A     | W49   | H58   | 0.42 | -0.303           | No    |
| T22S/S31Y   | <a href="#">1k8k</a> | D     | S166  | Y222  | 0.42 | -0.251           | No    |
| L56W/V63H   | <a href="#">3i24</a> | B     | W34   | H93   | 0.45 | -0.075           | No    |
| P13W/T17H   | <a href="#">1i5z</a> | A     | W13   | H17   | 0.46 | -0.074           | No    |
| T22S/S31T   | <a href="#">3oh8</a> | A     | S6    | T106  | 0.48 | 0.004            | No    |
| Q58S/V63Y   | <a href="#">1k8k</a> | D     | S166  | Y222  | 0.5  | 0.052            | No    |
| T22K/S31R   | <a href="#">2amu</a> | A     | K57   | R73   | 0.42 | 0.074            | No    |
| L56Y/K65Q   | <a href="#">4ch9</a> | A     | Y444  | Q462  | 0.44 | 0.083            | No    |
| T22W/L56H   | <a href="#">3aeh</a> | B     | W1180 | H1204 | 0.43 | 0.102            | No    |
| T22Q/S31T   | <a href="#">1lj5</a> | A     | Q322  | T339  | 0.25 | 0.134            | No    |
| H20Q/S31T   | <a href="#">1h1i</a> | B     | Q83   | T95   | 0.37 | 0.188            | No    |
| T22Q/T29W   | <a href="#">1qwy</a> | A     | Q244  | W257  | 0.39 | 0.188            | No    |
| S208N/K215T | <a href="#">4dol</a> | A     | N163  | T180  | 0.42 | 0.234            | No    |
| F132R/K141Q | <a href="#">3p9l</a> | A     | R234  | Q242  | 0.46 | 0.385            | No    |
| L56S/K65Y   | <a href="#">1k8k</a> | D     | S166  | Y222  | 0.39 | 0.417            | No    |
| T22D/T29W   | <a href="#">4m2f</a> | A     | D131  | W318  | 0.46 | 0.426            | No    |
| Q58N/V63S   | <a href="#">3o41</a> | L     | N161  | S177  | 0.41 | 0.469            | No    |
| K141E/Y178W | <a href="#">2e2v</a> | A     | E452  | W495  | 0.39 | 0.483            | No    |
| K99R/F162R  | <a href="#">2hhc</a> | A     | R5    | R34   | 0.49 | 0.535            | No    |
| E24N/T29S   | <a href="#">3o41</a> | L     | N161  | S177  | 0.5  | 0.546            | No    |
| L56W/K65H   | <a href="#">2qqz</a> | A     | W49   | H58   | 0.31 | 0.553            | No    |

| Mutation    | Template             | Chain | R1   | R2   | RMSD | $\Delta\Delta G$ | Clash |
|-------------|----------------------|-------|------|------|------|------------------|-------|
| V209S/V216H | <a href="#">3nrq</a> | B     | S71  | H115 | 0.48 | 0.584            | No    |
| T22E/S31N   | <a href="#">3sys</a> | A     | E343 | N369 | 0.38 | 0.635            | No    |
| T22D/T29K   | <a href="#">1gd1</a> | R     | D241 | K306 | 0.46 | 0.662            | No    |
| Q58K/V63R   | <a href="#">2amu</a> | A     | K57  | R73  | 0.38 | 0.673            | No    |
| Q58W/V63D   | <a href="#">2v8h</a> | C     | W251 | D320 | 0.35 | 0.71             | No    |
| N185Q/L189R | <a href="#">3px4</a> | A     | Q656 | R660 | 0.44 | 0.832            | No    |
| T22N/T29S   | <a href="#">1c27</a> | A     | N95  | S110 | 0.44 | 0.855            | No    |
| Q58S/V63T   | <a href="#">3oh8</a> | A     | S6   | T106 | 0.48 | 0.885            | No    |
| G36S/I41T   | <a href="#">3oh8</a> | A     | S6   | T106 | 0.48 | 0.93             | No    |
| H20D/S31K   | <a href="#">1gd1</a> | R     | D241 | K306 | 0.44 | 0.939            | No    |
| L56S/K65T   | <a href="#">3oh8</a> | A     | S6   | T106 | 0.42 | 0.975            | No    |
| L56K/K65R   | <a href="#">2amu</a> | A     | K57  | R73  | 0.46 | 1.005            | No    |
| L56D/V63K   | <a href="#">1gd1</a> | R     | D241 | K306 | 0.38 | 1.02             | No    |
| T22K/Q58K   | <a href="#">1h84</a> | C     | K241 | K250 | 0.43 | 1.082            | No    |
| L56Q/V63T   | <a href="#">1h1i</a> | B     | Q83  | T95  | 0.47 | 1.298            | No    |
| N23K/L55R   | <a href="#">2amu</a> | A     | K57  | R73  | 0.44 | 1.426            | No    |
| N23S/L55T   | <a href="#">3oh8</a> | A     | S6   | T106 | 0.38 | 1.574            | No    |
| L56N/K65S   | <a href="#">3o41</a> | L     | N161 | S177 | 0.42 | 1.682            | No    |
| Q73R/W198Y  | <a href="#">1es4</a> | A     | R30  | Y151 | 0.49 | 1.749            | No    |
| L21Y/L55S   | <a href="#">2zws</a> | A     | Y148 | S183 | 0.49 | 1.802            | No    |
| K141Q/Y178N | <a href="#">2ijo</a> | A     | Q292 | N313 | 0.47 | 1.95             | No    |
| P154K/I163T | <a href="#">2icc</a> | A     | K36  | T47  | 0.49 | 2.151            | No    |
| P154S/I163H | <a href="#">2blv</a> | A     | S32  | H40  | 0.41 | 2.204            | No    |

| Mutation    | Template             | Chain | R1   | R2   | RMSD | $\Delta\Delta G$ | Clash |
|-------------|----------------------|-------|------|------|------|------------------|-------|
| I41S/I85W   | <a href="#">2bi0</a> | A     | S311 | W330 | 0.5  | 2.237            | No    |
| P154T/I163S | <a href="#">4wik</a> | A     | T263 | S272 | 0.43 | 2.461            | No    |
| Q74S/I85T   | <a href="#">3oh8</a> | A     | S6   | T106 | 0.39 | 2.649            | No    |
| L21H/L55K   | <a href="#">5h8t</a> | A     | H116 | K127 | 0.43 | 2.819            | No    |
| V112T/V156Q | <a href="#">4jf8</a> | A     | T177 | Q192 | 0.48 | 2.882            | No    |
| Q74N/I85S   | <a href="#">3o41</a> | L     | N161 | S177 | 0.47 | 3.218            | No    |
| L111Q/L155H | <a href="#">3rof</a> | B     | Q19  | H24  | 0.48 | 3.314            | No    |
| L21T/L55N   | <a href="#">3lw2</a> | A     | T93  | N167 | 0.42 | 3.371            | No    |
| L21E/L55N   | <a href="#">2ofc</a> | B     | E113 | N121 | 0.43 | 3.438            | No    |
| I41E/I85Q   | <a href="#">1cpn</a> | A     | E51  | Q61  | 0.4  | 3.525            | No    |
| I42Q/I84N   | <a href="#">2ijo</a> | A     | Q292 | N313 | 0.43 | 3.53             | No    |
| L21S/V57T   | <a href="#">3oh8</a> | A     | S6   | T106 | 0.37 | 3.718            | No    |
| I35S/I42H   | <a href="#">3nrq</a> | B     | S71  | H115 | 0.44 | 3.722            | No    |
| L21N/L55S   | <a href="#">1c27</a> | A     | N95  | S110 | 0.5  | 3.872            | No    |
| L21N/V57S   | <a href="#">3o41</a> | L     | N161 | S177 | 0.19 | 3.894            | No    |
| I42S/I84T   | <a href="#">3oh8</a> | A     | S6   | T106 | 0.38 | 4.015            | No    |
| I42N/I84S   | <a href="#">3o41</a> | L     | N161 | S177 | 0.48 | 4.049            | No    |

Showing 1 to 61 of 61 entries



*Table S4. Two-hundred and thirteen mutants suggested for the Protease (ILGY).*

*Proteus ID: YTP3YC. Available at <<http://proteus.dcc.ufmg.br/result/id/YTP3YC>>.*

| <b>Mutation</b> | <b>Template</b>      | <b>Chain</b> | <b>R1</b> | <b>R2</b> | <b>RMSD</b> | <b><math>\Delta\Delta G</math></b> | <b>Clash</b> |
|-----------------|----------------------|--------------|-----------|-----------|-------------|------------------------------------|--------------|
| G111R/S115W     | <a href="#">1w35</a> | A            | R163      | W167      | 0.36        | -0.788                             | No           |
| G111Y/S115T     | <a href="#">4cae</a> | C            | Y88       | T92       | 0.3         | -0.605                             | No           |
| K138D/S171Y     | <a href="#">3pfc</a> | A            | D26       | Y101      | 0.36        | -0.527                             | No           |
| G111Q/S115Y     | <a href="#">1c27</a> | A            | Q130      | Y134      | 0.23        | -0.468                             | No           |
| T11Q/T18R       | <a href="#">4ni8</a> | A            | Q13       | R20       | 0.31        | -0.454                             | No           |
| T11S/Q15D       | <a href="#">4iqg</a> | B            | S37       | D41       | 0.48        | -0.388                             | No           |
| V41T/K45S       | <a href="#">3hh1</a> | C            | T43       | S47       | 0.48        | -0.38                              | No           |
| Y187R/S191R     | <a href="#">1qtx</a> | B            | R12       | R16       | 0.35        | -0.325                             | No           |
| G111Q/S115R     | <a href="#">2x1c</a> | B            | Q196      | R200      | 0.24        | -0.282                             | No           |
| G111K/S115H     | <a href="#">2ifq</a> | A            | K39       | H43       | 0.28        | -0.191                             | No           |
| G111T/S115R     | <a href="#">3mux</a> | A            | T233      | R237      | 0.48        | -0.13                              | No           |
| T174Q/F196Y     | <a href="#">4gmf</a> | D            | Q99       | Y122      | 0.48        | -0.119                             | No           |
| I14W/T18Y       | <a href="#">5std</a> | C            | W26       | Y30       | 0.35        | -0.1                               | No           |
| V41R/K45N       | <a href="#">3ix8</a> | A            | R137      | N141      | 0.36        | -0.052                             | No           |
| T57N/N64S       | <a href="#">3o41</a> | L            | N161      | S177      | 0.49        | -0.022                             | No           |
| P183D/Y187W     | <a href="#">4ggo</a> | A            | D205      | W209      | 0.48        | 0.027                              | No           |
| T18W/G22S       | <a href="#">2ejj</a> | C            | W146      | S150      | 0.19        | 0.046                              | No           |
| G111K/Q118K     | <a href="#">3ly3</a> | A            | K277      | K284      | 0.46        | 0.066                              | No           |
| S114Q/Q118R     | <a href="#">2x1c</a> | B            | Q196      | R200      | 0.47        | 0.097                              | No           |

| Mutation    | Template             | Chain | R1   | R2   | RMSD | $\Delta\Delta G$ | Clash |
|-------------|----------------------|-------|------|------|------|------------------|-------|
| P183H/Y187W | <a href="#">4eng</a> | D     | H251 | W255 | 0.5  | 0.133            | No    |
| T184K/S191R | <a href="#">4r0y</a> | A     | K827 | R834 | 0.43 | 0.148            | No    |
| E129R/A133S | <a href="#">4ood</a> | A     | R31  | S35  | 0.34 | 0.167            | No    |
| Y187W/S191Q | <a href="#">2q79</a> | A     | W339 | Q343 | 0.3  | 0.195            | No    |
| A110T/S114Q | <a href="#">3c9x</a> | A     | T109 | Q113 | 0.49 | 0.24             | No    |
| Q44Y/P48R   | <a href="#">4q5e</a> | C     | Y129 | R133 | 0.47 | 0.286            | No    |
| G111R/S115N | <a href="#">3ix8</a> | A     | R137 | N141 | 0.45 | 0.294            | No    |
| A110S/S114W | <a href="#">3o4w</a> | B     | S123 | W127 | 0.43 | 0.305            | No    |
| F97T/K107T  | <a href="#">1bu8</a> | A     | T414 | T437 | 0.5  | 0.312            | No    |
| V41S/K45W   | <a href="#">3o4w</a> | B     | S123 | W127 | 0.42 | 0.354            | No    |
| P183T/Y187R | <a href="#">3mux</a> | A     | T233 | R237 | 0.26 | 0.459            | No    |
| T11R/Q15N   | <a href="#">3ix8</a> | A     | R137 | N141 | 0.28 | 0.469            | No    |
| P183T/Y187Q | <a href="#">3c9x</a> | A     | T109 | Q113 | 0.39 | 0.504            | No    |
| S114H/Q118W | <a href="#">4eng</a> | D     | H251 | W255 | 0.35 | 0.512            | No    |
| Y116W/V120Q | <a href="#">1uza</a> | A     | W104 | Q108 | 0.38 | 0.516            | No    |
| S114E/Q118Y | <a href="#">3ub9</a> | A     | E48  | Y52  | 0.36 | 0.525            | No    |
| K226D/Q233E | <a href="#">4gqn</a> | A     | D13  | E27  | 0.45 | 0.635            | No    |
| S114K/Q118H | <a href="#">2ifq</a> | A     | K39  | H43  | 0.47 | 0.643            | No    |
| S114Q/Q118Y | <a href="#">1c27</a> | A     | Q130 | Y134 | 0.46 | 0.645            | No    |
| Q15R/K19R   | <a href="#">1qtx</a> | B     | R12  | R16  | 0.31 | 0.675            | No    |
| G111K/S115N | <a href="#">3lk4</a> | W     | K237 | N241 | 0.28 | 0.716            | No    |

| Mutation    | Template             | Chain | R1   | R2   | RMSD | $\Delta\Delta G$ | Clash |
|-------------|----------------------|-------|------|------|------|------------------|-------|
| Q44K/P48N   | <a href="#">4nat</a> | A     | K108 | N112 | 0.5  | 0.722            | No    |
| P183S/Y187D | <a href="#">4iqg</a> | B     | S37  | D41  | 0.47 | 0.759            | No    |
| Y187W/S191T | <a href="#">1c5v</a> | A     | W237 | T241 | 0.4  | 0.794            | No    |
| S114H/Q118Y | <a href="#">1xh8</a> | A     | H142 | Y146 | 0.4  | 0.805            | No    |
| Y187D/S191W | <a href="#">4ggo</a> | A     | D205 | W209 | 0.35 | 0.815            | No    |
| G111H/S115N | <a href="#">4hmm</a> | B     | H177 | N181 | 0.29 | 0.833            | No    |
| P183K/Y187H | <a href="#">2ifq</a> | A     | K39  | H43  | 0.48 | 0.847            | No    |
| A110S/S114D | <a href="#">4iqg</a> | B     | S37  | D41  | 0.35 | 0.864            | No    |
| S114H/Q118N | <a href="#">4hmm</a> | B     | H177 | N181 | 0.46 | 0.876            | No    |
| S114K/Q118N | <a href="#">3lk4</a> | W     | K237 | N241 | 0.27 | 0.965            | No    |
| P183T/Y187S | <a href="#">3hh1</a> | C     | T43  | S47  | 0.42 | 0.968            | No    |
| P183R/Y187N | <a href="#">3ix8</a> | A     | R137 | N141 | 0.17 | 0.995            | No    |
| P125N/E129Y | <a href="#">3v1w</a> | B     | N375 | Y379 | 0.23 | 1.001            | No    |
| A12Q/E16H   | <a href="#">2gj3</a> | A     | Q29  | H33  | 0.49 | 1.02             | No    |
| G111N/S115T | <a href="#">3bol</a> | B     | N190 | T194 | 0.4  | 1.02             | No    |
| L113W/E117W | <a href="#">4tf4</a> | A     | W287 | W291 | 0.39 | 1.069            | No    |
| Y187S/S191K | <a href="#">4kn8</a> | B     | S26  | K30  | 0.33 | 1.084            | No    |
| S114H/Q118S | <a href="#">1p7g</a> | H     | H87  | S91  | 0.45 | 1.092            | No    |
| Y66W/V79Q   | <a href="#">4h3l</a> | A     | W93  | Q109 | 0.33 | 1.178            | No    |
| L113H/E117W | <a href="#">4enq</a> | D     | H251 | W255 | 0.34 | 1.234            | No    |
| A8S/I14R    | <a href="#">4i7e</a> | B     | S255 | R261 | 0.42 | 1.251            | No    |

| Mutation    | Template             | Chain | R1   | R2   | RMSD | $\Delta\Delta G$ | Clash |
|-------------|----------------------|-------|------|------|------|------------------|-------|
| G111S/S115H | <a href="#">4toh</a> | B     | S126 | H130 | 0.21 | 1.253            | No    |
| R69S/I76Y   | <a href="#">1k8k</a> | D     | S166 | Y222 | 0.48 | 1.28             | No    |
| D157R/R161S | <a href="#">4ood</a> | A     | R31  | S35  | 0.39 | 1.288            | No    |
| P125S/E129K | <a href="#">4kn8</a> | B     | S26  | K30  | 0.16 | 1.293            | No    |
| P183S/Y187K | <a href="#">4kn8</a> | B     | S26  | K30  | 0.49 | 1.293            | No    |
| T18H/G22S   | <a href="#">1p7g</a> | H     | H87  | S91  | 0.35 | 1.3              | No    |
| P183H/Y187N | <a href="#">4hmm</a> | B     | H177 | N181 | 0.47 | 1.303            | No    |
| G111S/S115K | <a href="#">4kn8</a> | B     | S26  | K30  | 0.23 | 1.309            | No    |
| T174S/F196H | <a href="#">8dfr</a> | A     | S6   | H131 | 0.45 | 1.33             | No    |
| Q15N/K19T   | <a href="#">3bol</a> | B     | N190 | T194 | 0.46 | 1.331            | No    |
| L113H/E117Y | <a href="#">1xh8</a> | A     | H142 | Y146 | 0.37 | 1.371            | No    |
| T11S/Q15W   | <a href="#">3o4w</a> | B     | S123 | W127 | 0.39 | 1.376            | No    |
| T174E/F196H | <a href="#">3apt</a> | A     | E18  | H270 | 0.45 | 1.409            | No    |
| L113Q/E117Y | <a href="#">1c27</a> | A     | Q130 | Y134 | 0.27 | 1.41             | No    |
| L113Q/E117H | <a href="#">2gj3</a> | A     | Q29  | H33  | 0.5  | 1.417            | No    |
| L113K/E117H | <a href="#">2ifq</a> | A     | K39  | H43  | 0.31 | 1.421            | No    |
| P125S/E129H | <a href="#">4toh</a> | B     | S126 | H130 | 0.24 | 1.454            | No    |
| V221S/I234Q | <a href="#">5a51</a> | B     | S154 | Q165 | 0.43 | 1.477            | No    |
| V120S/F124S | <a href="#">1pbw</a> | B     | S265 | S269 | 0.47 | 1.49             | No    |
| L113N/E117T | <a href="#">3bol</a> | B     | N190 | T194 | 0.45 | 1.512            | No    |
| L113T/E117H | <a href="#">3vpc</a> | C     | T148 | H152 | 0.28 | 1.52             | No    |

| <b>Mutation</b> | <b>Template</b>      | <b>Chain</b> | <b>R1</b> | <b>R2</b> | <b>RMSD</b> | <b><math>\Delta\Delta G</math></b> | <b>Clash</b> |
|-----------------|----------------------|--------------|-----------|-----------|-------------|------------------------------------|--------------|
| Y66W/V79N       | <a href="#">2wht</a> | C            | W89       | N105      | 0.39        | 1.521                              | No           |
| L113E/E117Y     | <a href="#">3ub9</a> | A            | E48       | Y52       | 0.22        | 1.526                              | No           |
| L113S/E117H     | <a href="#">4toh</a> | B            | S126      | H130      | 0.26        | 1.561                              | No           |
| I14W/T18S       | <a href="#">2ejj</a> | C            | W146      | S150      | 0.2         | 1.58                               | No           |
| L113D/E117W     | <a href="#">4ggo</a> | A            | D205      | W209      | 0.23        | 1.598                              | No           |
| T184S/Y188D     | <a href="#">4iqg</a> | B            | S37       | D41       | 0.49        | 1.653                              | No           |
| V67Y/I76S       | <a href="#">2zws</a> | A            | Y148      | S183      | 0.39        | 1.671                              | No           |
| F124T/Q128S     | <a href="#">3hh1</a> | C            | T43       | S47       | 0.46        | 1.683                              | No           |
| L131K/P135N     | <a href="#">4nat</a> | A            | K108      | N112      | 0.44        | 1.754                              | No           |
| F124S/Q128D     | <a href="#">4iqg</a> | B            | S37       | D41       | 0.38        | 1.775                              | No           |
| T184N/Y188T     | <a href="#">3bol</a> | B            | N190      | T194      | 0.42        | 1.807                              | No           |
| Q13H/F17S       | <a href="#">1p7g</a> | H            | H87       | S91       | 0.35        | 1.816                              | No           |
| K19E/I23Y       | <a href="#">3ub9</a> | A            | E48       | Y52       | 0.16        | 1.849                              | No           |
| F124N/Q128T     | <a href="#">3bol</a> | B            | N190      | T194      | 0.42        | 1.861                              | No           |
| V67Y/I76N       | <a href="#">4nbz</a> | A            | Y30       | N37       | 0.47        | 1.905                              | No           |
| L113H/E117N     | <a href="#">4hmm</a> | B            | H177      | N181      | 0.35        | 1.912                              | No           |
| T184N/Y188E     | <a href="#">4dno</a> | B            | N233      | E237      | 0.42        | 1.971                              | No           |
| F124Q/Q128Y     | <a href="#">1c27</a> | A            | Q130      | Y134      | 0.37        | 1.995                              | No           |
| V126T/Q130H     | <a href="#">3vpc</a> | C            | T148      | H152      | 0.17        | 2.025                              | No           |
| F124Q/Q128R     | <a href="#">2x1c</a> | B            | Q196      | R200      | 0.31        | 2.027                              | No           |
| Q13H/F17N       | <a href="#">4hmm</a> | B            | H177      | N181      | 0.35        | 2.053                              | No           |

| <b>Mutation</b> | <b>Template</b>      | <b>Chain</b> | <b>R1</b> | <b>R2</b> | <b>RMSD</b> | <b><math>\Delta\Delta G</math></b> | <b>Clash</b> |
|-----------------|----------------------|--------------|-----------|-----------|-------------|------------------------------------|--------------|
| Q13N/F17T       | <a href="#">3bol</a> | B            | N190      | T194      | 0.39        | 2.093                              | No           |
| F124Y/Q128T     | <a href="#">4cae</a> | C            | Y88       | T92       | 0.27        | 2.125                              | No           |
| I14S/T18Q       | <a href="#">2ao9</a> | C            | S96       | Q100      | 0.23        | 2.127                              | No           |
| A151N/G155T     | <a href="#">3bol</a> | B            | N190      | T194      | 0.31        | 2.156                              | No           |
| K19Q/I23Y       | <a href="#">1c27</a> | A            | Q130      | Y134      | 0.22        | 2.168                              | No           |
| F124E/Q128Y     | <a href="#">3ub9</a> | A            | E48       | Y52       | 0.31        | 2.17                               | No           |
| V126N/Q130T     | <a href="#">3bol</a> | B            | N190      | T194      | 0.4         | 2.182                              | No           |
| F124S/Q128H     | <a href="#">4toh</a> | B            | S126      | H130      | 0.38        | 2.213                              | No           |
| M156N/Q160T     | <a href="#">3bol</a> | B            | N190      | T194      | 0.35        | 2.225                              | No           |
| T184Q/Y188H     | <a href="#">2gj3</a> | A            | Q29       | H33       | 0.44        | 2.226                              | No           |
| F124H/Q128N     | <a href="#">4hmm</a> | B            | H177      | N181      | 0.28        | 2.232                              | No           |
| Q13E/F17Y       | <a href="#">3ub9</a> | A            | E48       | Y52       | 0.27        | 2.236                              | No           |
| L113H/E117S     | <a href="#">1p7g</a> | H            | H87       | S91       | 0.34        | 2.237                              | No           |
| F124W/Q128T     | <a href="#">1c5v</a> | A            | W237      | T241      | 0.35        | 2.246                              | No           |
| Q13S/F17H       | <a href="#">4toh</a> | B            | S126      | H130      | 0.27        | 2.246                              | No           |
| L113K/E117N     | <a href="#">3lk4</a> | W            | K237      | N241      | 0.24        | 2.249                              | No           |
| L68Y/Y77N       | <a href="#">4yal</a> | B            | Y478      | N486      | 0.4         | 2.264                              | No           |
| F185K/V189H     | <a href="#">2ifq</a> | A            | K39       | H43       | 0.3         | 2.287                              | No           |
| Q13S/F17Y       | <a href="#">3r3r</a> | A            | S159      | Y163      | 0.5         | 2.288                              | No           |
| A186N/E190T     | <a href="#">3bol</a> | B            | N190      | T194      | 0.4         | 2.289                              | No           |
| F185Q/V189Y     | <a href="#">1c27</a> | A            | Q130      | Y134      | 0.25        | 2.29                               | No           |

| Mutation    | Template             | Chain | R1   | R2   | RMSD | $\Delta\Delta G$ | Clash |
|-------------|----------------------|-------|------|------|------|------------------|-------|
| F124H/Q128S | <a href="#">1p7g</a> | H     | H87  | S91  | 0.45 | 2.299            | No    |
| T184H/Y188S | <a href="#">1p7g</a> | H     | H87  | S91  | 0.4  | 2.309            | No    |
| F124K/L131R | <a href="#">4r0y</a> | A     | K827 | R834 | 0.5  | 2.318            | No    |
| I14S/T18H   | <a href="#">4toh</a> | B     | S126 | H130 | 0.3  | 2.318            | No    |
| F86T/I90S   | <a href="#">3hh1</a> | C     | T43  | S47  | 0.38 | 2.319            | No    |
| G181K/F185H | <a href="#">4j6j</a> | A     | K182 | H186 | 0.48 | 2.32             | No    |
| L153N/D157T | <a href="#">3bol</a> | B     | N190 | T194 | 0.36 | 2.34             | No    |
| I14S/T18K   | <a href="#">4kn8</a> | B     | S26  | K30  | 0.22 | 2.37             | No    |
| V67T/I76H   | <a href="#">3fe4</a> | A     | T214 | H229 | 0.45 | 2.37             | No    |
| V126S/Q130D | <a href="#">4iqg</a> | B     | S37  | D41  | 0.49 | 2.375            | No    |
| I14H/T18S   | <a href="#">1p7g</a> | H     | H87  | S91  | 0.46 | 2.376            | No    |
| F185Y/V189T | <a href="#">4cae</a> | C     | Y88  | T92  | 0.26 | 2.439            | No    |
| L146S/Q150H | <a href="#">4toh</a> | B     | S126 | H130 | 0.49 | 2.446            | No    |
| V126S/Q130H | <a href="#">4toh</a> | B     | S126 | H130 | 0.22 | 2.449            | No    |
| F124N/Q128Y | <a href="#">3vlw</a> | B     | N375 | Y379 | 0.34 | 2.45             | No    |
| I52N/Y66T   | <a href="#">4emd</a> | A     | N23  | T41  | 0.44 | 2.45             | No    |
| L68Q/V79T   | <a href="#">1ajs</a> | B     | Q254 | T271 | 0.33 | 2.463            | No    |
| A9D/F17R    | <a href="#">1m22</a> | B     | D147 | R155 | 0.35 | 2.472            | No    |
| A149Y/L153T | <a href="#">4cae</a> | C     | Y88  | T92  | 0.32 | 2.509            | No    |
| F124R/Q128N | <a href="#">3ix8</a> | A     | R137 | N141 | 0.44 | 2.536            | No    |
| R69S/I76T   | <a href="#">3oh8</a> | A     | S6   | T106 | 0.32 | 2.536            | No    |

| Mutation    | Template             | Chain | R1   | R2   | RMSD | $\Delta\Delta G$ | Clash |
|-------------|----------------------|-------|------|------|------|------------------|-------|
| V127K/L131H | <a href="#">2ifq</a> | A     | K39  | H43  | 0.3  | 2.541            | No    |
| I76H/V139Q  | <a href="#">3oe1</a> | A     | H21  | Q44  | 0.36 | 2.544            | No    |
| L152E/M156Y | <a href="#">3ub9</a> | A     | E48  | Y52  | 0.23 | 2.611            | No    |
| V126S/Q130K | <a href="#">4kn8</a> | B     | S26  | K30  | 0.22 | 2.634            | No    |
| K19H/I23K   | <a href="#">1k3t</a> | C     | H349 | K353 | 0.5  | 2.641            | No    |
| M156S/Q160K | <a href="#">4kn8</a> | B     | S26  | K30  | 0.5  | 2.652            | No    |
| K19S/I23Y   | <a href="#">3r3r</a> | A     | S159 | Y163 | 0.49 | 2.661            | No    |
| V67H/I76K   | <a href="#">5h8t</a> | A     | H116 | K127 | 0.45 | 2.67             | No    |
| F56T/V67K   | <a href="#">1naq</a> | A     | T41  | K67  | 0.41 | 2.675            | No    |
| F185H/V189N | <a href="#">4hmm</a> | B     | H177 | N181 | 0.26 | 2.68             | No    |
| F185N/V189T | <a href="#">3bol</a> | B     | N190 | T194 | 0.4  | 2.682            | No    |
| F124K/Q128N | <a href="#">3lk4</a> | W     | K237 | N241 | 0.38 | 2.683            | No    |
| F124K/Q128H | <a href="#">2ifq</a> | A     | K39  | H43  | 0.2  | 2.696            | No    |
| A149S/L153Y | <a href="#">3r3r</a> | A     | S159 | Y163 | 0.5  | 2.701            | No    |
| F185T/V189H | <a href="#">3vpc</a> | C     | T148 | H152 | 0.18 | 2.702            | No    |
| V67Q/I76T   | <a href="#">1h1i</a> | B     | Q83  | T95  | 0.49 | 2.702            | No    |
| A149S/L153K | <a href="#">4kn8</a> | B     | S26  | K30  | 0.24 | 2.711            | No    |
| K19N/I23T   | <a href="#">3bol</a> | B     | N190 | T194 | 0.4  | 2.712            | No    |
| F124S/Q128K | <a href="#">4kn8</a> | B     | S26  | K30  | 0.27 | 2.738            | No    |
| K19N/I23E   | <a href="#">4dno</a> | B     | N233 | E237 | 0.49 | 2.741            | No    |
| L152N/M156Y | <a href="#">3v1w</a> | B     | N375 | Y379 | 0.31 | 2.745            | No    |



| Mutation    | Template             | Chain | R1   | R2   | RMSD | $\Delta\Delta G$ | Clash |
|-------------|----------------------|-------|------|------|------|------------------|-------|
| F86S/I90D   | <a href="#">4iqg</a> | B     | S37  | D41  | 0.43 | 2.771            | No    |
| I52S/Y66H   | <a href="#">3f5o</a> | B     | S83  | H134 | 0.46 | 2.798            | No    |
| Q13S/F17K   | <a href="#">4kn8</a> | B     | S26  | K30  | 0.24 | 2.8              | No    |
| L152Q/M156H | <a href="#">2gj3</a> | A     | Q29  | H33  | 0.43 | 2.802            | No    |
| K19H/I23Y   | <a href="#">1xh8</a> | A     | H142 | Y146 | 0.28 | 2.812            | No    |
| F124T/Q128R | <a href="#">3mux</a> | A     | T233 | R237 | 0.43 | 2.845            | No    |
| A149S/L153H | <a href="#">4toh</a> | B     | S126 | H130 | 0.3  | 2.851            | No    |
| A154S/L158H | <a href="#">4toh</a> | B     | S126 | H130 | 0.29 | 2.854            | No    |
| A154Y/L158T | <a href="#">4cae</a> | C     | Y88  | T92  | 0.28 | 2.881            | No    |
| F185S/V189H | <a href="#">4toh</a> | B     | S126 | H130 | 0.22 | 2.889            | No    |
| F185K/V189N | <a href="#">3lk4</a> | W     | K237 | N241 | 0.24 | 2.898            | No    |
| V127T/L131H | <a href="#">3vpc</a> | C     | T148 | H152 | 0.22 | 2.912            | No    |
| K19S/I23H   | <a href="#">4toh</a> | B     | S126 | H130 | 0.2  | 2.921            | No    |
| F185H/V189S | <a href="#">1p7g</a> | H     | H87  | S91  | 0.37 | 2.928            | No    |
| K19H/I23S   | <a href="#">1p7g</a> | H     | H87  | S91  | 0.47 | 2.955            | No    |
| I52D/Y66Q   | <a href="#">3vc1</a> | G     | D248 | Q283 | 0.38 | 2.981            | No    |
| L78T/V139K  | <a href="#">5dzq</a> | O     | T135 | K184 | 0.37 | 3.011            | No    |
| L152S/M156W | <a href="#">3o4w</a> | B     | S123 | W127 | 0.49 | 3.026            | No    |
| Q42R/W46S   | <a href="#">4ood</a> | A     | R31  | S35  | 0.41 | 3.032            | No    |
| F185S/V189K | <a href="#">4kn8</a> | B     | S26  | K30  | 0.24 | 3.035            | No    |
| V127H/L131N | <a href="#">4hmm</a> | B     | H177 | N181 | 0.35 | 3.045            | No    |

| <b>Mutation</b> | <b>Template</b>      | <b>Chain</b> | <b>R1</b> | <b>R2</b> | <b>RMSD</b> | <b><math>\Delta\Delta G</math></b> | <b>Clash</b> |
|-----------------|----------------------|--------------|-----------|-----------|-------------|------------------------------------|--------------|
| L78E/V139H      | <a href="#">3apt</a> | A            | E18       | H270      | 0.44        | 3.052                              | No           |
| K19H/I23N       | <a href="#">4hmm</a> | B            | H177      | N181      | 0.25        | 3.063                              | No           |
| V67T/I76N       | <a href="#">3lw2</a> | A            | T93       | N167      | 0.43        | 3.104                              | No           |
| L78H/V139N      | <a href="#">2cki</a> | B            | H72       | N172      | 0.38        | 3.107                              | No           |
| Y66Q/Y77R       | <a href="#">3aeh</a> | A            | Q1247     | R1282     | 0.5         | 3.117                              | No           |
| V127N/L131Y     | <a href="#">3vlw</a> | B            | N375      | Y379      | 0.19        | 3.118                              | No           |
| V127D/L131W     | <a href="#">4ggo</a> | A            | D205      | W209      | 0.18        | 3.16                               | No           |
| I52D/Y66K       | <a href="#">4ivd</a> | B            | D880      | K888      | 0.46        | 3.21                               | No           |
| Y77K/I140T      | <a href="#">2yaf</a> | A            | K43       | T83       | 0.32        | 3.211                              | No           |
| V67Q/L78N       | <a href="#">2jjo</a> | A            | Q292      | N313      | 0.45        | 3.214                              | No           |
| V67H/L78S       | <a href="#">3bzn</a> | A            | H223      | S237      | 0.41        | 3.229                              | No           |
| I52T/Y66E       | <a href="#">3ot8</a> | A            | T14       | E22       | 0.4         | 3.27                               | No           |
| V127H/L131S     | <a href="#">1p7g</a> | H            | H87       | S91       | 0.32        | 3.292                              | No           |
| V67D/I76K       | <a href="#">1gd1</a> | R            | D241      | K306      | 0.4         | 3.295                              | No           |
| L152H/M156N     | <a href="#">4hmm</a> | B            | H177      | N181      | 0.23        | 3.297                              | No           |
| L152S/M156H     | <a href="#">4toh</a> | B            | S126      | H130      | 0.32        | 3.298                              | No           |
| L152N/M156T     | <a href="#">3bol</a> | B            | N190      | T194      | 0.29        | 3.329                              | No           |
| L152H/M156S     | <a href="#">1p7g</a> | H            | H87       | S91       | 0.38        | 3.364                              | No           |
| V127S/L131H     | <a href="#">4toh</a> | B            | S126      | H130      | 0.17        | 3.388                              | No           |
| Y66H/Y77N       | <a href="#">4d5d</a> | B            | H24       | N55       | 0.43        | 3.414                              | No           |
| A154S/L158D     | <a href="#">4iqg</a> | B            | S37       | D41       | 0.5         | 3.437                              | No           |

| <b>Mutation</b> | <b>Template</b>      | <b>Chain</b> | <b>R1</b> | <b>R2</b> | <b>RMSD</b> | <b><math>\Delta\Delta G</math></b> | <b>Clash</b> |
|-----------------|----------------------|--------------|-----------|-----------|-------------|------------------------------------|--------------|
| V127N/L131T     | <a href="#">3bol</a> | B            | N190      | T194      | 0.45        | 3.477                              | No           |
| V67N/L78S       | <a href="#">3o4l</a> | L            | N161      | S177      | 0.33        | 3.579                              | No           |
| V67S/L78T       | <a href="#">3oh8</a> | A            | S6        | T106      | 0.38        | 3.647                              | No           |
| L68S/Y77H       | <a href="#">3nrq</a> | B            | S71       | H115      | 0.39        | 3.65                               | No           |
| I52S/Y66E       | <a href="#">1ral</a> | A            | S135      | E154      | 0.36        | 3.699                              | No           |

Showing 1 to 213 of 213 entries

Table S5. Three-hundred forty-four mutants suggested for the  $\beta$ -glucosidase (hydrolase; IBGA).Proteus ID: 4L8HLU. Available at <<http://proteus.dcc.ufmg.br/result/id/4L8HLU>>.

| Mutation    | Template             | Chain | R1   | R2   | RMSD | $\Delta\Delta G$ | Clash |
|-------------|----------------------|-------|------|------|------|------------------|-------|
| V264W/A268S | <a href="#">2eij</a> | C     | W146 | S150 | 0.16 | -0.83            | No    |
| R207Q/L211Q | <a href="#">3n0y</a> | A     | Q26  | Q30  | 0.21 | -0.762           | No    |
| V264W/A268T | <a href="#">1c5v</a> | A     | W237 | T241 | 0.32 | -0.734           | No    |
| R302H/I315N | <a href="#">5f9o</a> | H     | H35  | N99  | 0.5  | -0.729           | No    |
| V380E/R384Y | <a href="#">3ub9</a> | A     | E48  | Y52  | 0.16 | -0.705           | No    |
| V264H/A268N | <a href="#">4hmm</a> | B     | H177 | N181 | 0.24 | -0.66            | No    |
| R138Y/A142T | <a href="#">4cae</a> | C     | Y88  | T92  | 0.49 | -0.657           | No    |
| V264H/A268S | <a href="#">1p7g</a> | H     | H87  | S91  | 0.34 | -0.633           | No    |
| R138D/A142Q | <a href="#">2rin</a> | B     | D251 | Q255 | 0.41 | -0.628           | No    |
| V380Q/R384Y | <a href="#">1c27</a> | A     | Q130 | Y134 | 0.16 | -0.606           | No    |
| V264Y/A268T | <a href="#">4cae</a> | C     | Y88  | T92  | 0.23 | -0.598           | No    |
| V380W/R384S | <a href="#">2eij</a> | C     | W146 | S150 | 0.1  | -0.555           | No    |
| V264Q/A268Y | <a href="#">1c27</a> | A     | Q130 | Y134 | 0.25 | -0.545           | No    |
| H383N/H387T | <a href="#">3bol</a> | B     | N190 | T194 | 0.44 | -0.518           | No    |
| V380H/R384N | <a href="#">4hmm</a> | B     | H177 | N181 | 0.24 | -0.505           | No    |
| R103S/L107H | <a href="#">4toh</a> | B     | S126 | H130 | 0.39 | -0.483           | No    |
| V264Q/A268R | <a href="#">2x1c</a> | B     | Q196 | R200 | 0.23 | -0.48            | No    |
| V380D/R384W | <a href="#">4ggo</a> | A     | D205 | W209 | 0.18 | -0.48            | No    |
| V380N/R384E | <a href="#">4dno</a> | B     | N233 | E237 | 0.39 | -0.47            | No    |
| V264N/A268T | <a href="#">3bol</a> | B     | N190 | T194 | 0.4  | -0.469           | No    |

| Mutation    | Template             | Chain | R1   | R2   | RMSD | $\Delta\Delta G$ | Clash |
|-------------|----------------------|-------|------|------|------|------------------|-------|
| V380H/R384W | <a href="#">4enq</a> | D     | H251 | W255 | 0.33 | -0.462           | No    |
| V380H/R384Y | <a href="#">1xh8</a> | A     | H142 | Y146 | 0.33 | -0.459           | No    |
| V264R/A268N | <a href="#">3ix8</a> | A     | R137 | N141 | 0.5  | -0.437           | No    |
| V380Y/R384T | <a href="#">4cae</a> | C     | Y88  | T92  | 0.25 | -0.436           | No    |
| V105N/N109E | <a href="#">4dno</a> | B     | N233 | E237 | 0.49 | -0.421           | No    |
| S373E/Q377Y | <a href="#">3ub9</a> | A     | E48  | Y52  | 0.18 | -0.404           | No    |
| S373R/Q377W | <a href="#">1w35</a> | A     | R163 | W167 | 0.31 | -0.4             | No    |
| V380S/R384Y | <a href="#">3r3r</a> | A     | S159 | Y163 | 0.44 | -0.397           | No    |
| V205S/R209H | <a href="#">4toh</a> | B     | S126 | H130 | 0.23 | -0.387           | No    |
| A237H/R241N | <a href="#">4hmm</a> | B     | H177 | N181 | 0.29 | -0.367           | No    |
| S373N/Q377Y | <a href="#">3v1w</a> | B     | N375 | Y379 | 0.23 | -0.353           | No    |
| A240N/S244T | <a href="#">3bol</a> | B     | N190 | T194 | 0.39 | -0.348           | No    |
| L98N/H102E  | <a href="#">4dno</a> | B     | N233 | E237 | 0.32 | -0.326           | No    |
| S373Q/Q377Y | <a href="#">1c27</a> | A     | Q130 | Y134 | 0.31 | -0.313           | No    |
| L98D/H102Q  | <a href="#">2rin</a> | B     | D251 | Q255 | 0.31 | -0.312           | No    |
| V380N/R384T | <a href="#">3bol</a> | B     | N190 | T194 | 0.4  | -0.296           | No    |
| V144D/E148N | <a href="#">4nac</a> | B     | D65  | N69  | 0.46 | -0.276           | No    |
| D192N/H196E | <a href="#">4dno</a> | B     | N233 | E237 | 0.42 | -0.275           | No    |
| V104E/L108Y | <a href="#">3ub9</a> | A     | E48  | Y52  | 0.2  | -0.268           | No    |
| V380H/R384S | <a href="#">1p7g</a> | H     | H87  | S91  | 0.41 | -0.267           | No    |
| Q141D/Q145W | <a href="#">4ggo</a> | A     | D205 | W209 | 0.14 | -0.266           | No    |
| K236R/A240R | <a href="#">1qtx</a> | B     | R12  | R16  | 0.23 | -0.26            | No    |

| Mutation    | Template             | Chain | R1   | R2   | RMSD | $\Delta\Delta G$ | Clash |
|-------------|----------------------|-------|------|------|------|------------------|-------|
| V105S/N109D | <a href="#">4iqg</a> | B     | S37  | D41  | 0.5  | -0.251           | No    |
| V380S/R384H | <a href="#">4toh</a> | B     | S126 | H130 | 0.18 | -0.244           | No    |
| H195N/V199Y | <a href="#">3vlw</a> | B     | N375 | Y379 | 0.24 | -0.24            | No    |
| Y334N/H338E | <a href="#">4dno</a> | B     | N233 | E237 | 0.5  | -0.224           | No    |
| Y100D/V104W | <a href="#">4ggo</a> | A     | D205 | W209 | 0.28 | -0.218           | No    |
| Q141R/Q145W | <a href="#">1w35</a> | A     | R163 | W167 | 0.36 | -0.196           | No    |
| F78W/P115T  | <a href="#">2yp6</a> | C     | W77  | T106 | 0.47 | -0.193           | No    |
| V264S/A268K | <a href="#">4kn8</a> | B     | S26  | K30  | 0.16 | -0.177           | No    |
| I65N/K69T   | <a href="#">3bol</a> | B     | N190 | T194 | 0.43 | -0.171           | No    |
| V199E/L203Y | <a href="#">3ub9</a> | A     | E48  | Y52  | 0.17 | -0.159           | No    |
| Q381N/T385E | <a href="#">4dno</a> | B     | N233 | E237 | 0.44 | -0.158           | No    |
| L107Q/N111Q | <a href="#">3n0y</a> | A     | Q26  | Q30  | 0.32 | -0.145           | No    |
| Y334D/H338N | <a href="#">4nac</a> | B     | D65  | N69  | 0.47 | -0.141           | No    |
| T37R/T41S   | <a href="#">3evo</a> | D     | R196 | S200 | 0.43 | -0.13            | No    |
| V380K/R384H | <a href="#">2ifq</a> | A     | K39  | H43  | 0.28 | -0.123           | No    |
| W434D/V438Q | <a href="#">2rin</a> | B     | D251 | Q255 | 0.34 | -0.122           | No    |
| D192N/H196T | <a href="#">3bol</a> | B     | N190 | T194 | 0.28 | -0.118           | No    |
| H195N/V199E | <a href="#">4dno</a> | B     | N233 | E237 | 0.45 | -0.115           | No    |
| V380S/R384K | <a href="#">4kn8</a> | B     | S26  | K30  | 0.19 | -0.115           | No    |
| Q188N/D192E | <a href="#">4dno</a> | B     | N233 | E237 | 0.43 | -0.114           | No    |
| I3E/E445N   | <a href="#">3sys</a> | A     | E343 | N369 | 0.4  | -0.106           | No    |
| Q141N/Q145E | <a href="#">4dno</a> | B     | N233 | E237 | 0.46 | -0.105           | No    |

| Mutation    | Template             | Chain | R1   | R2   | RMSD | $\Delta\Delta G$ | Clash |
|-------------|----------------------|-------|------|------|------|------------------|-------|
| W434N/V438Y | <a href="#">3vlw</a> | B     | N375 | Y379 | 0.33 | -0.104           | No    |
| V205K/R209N | <a href="#">3lk4</a> | W     | K237 | N241 | 0.31 | -0.098           | No    |
| E233S/A237Q | <a href="#">2ao9</a> | C     | S96  | Q100 | 0.47 | -0.097           | No    |
| G279S/I283R | <a href="#">4ise</a> | A     | S418 | R422 | 0.26 | -0.082           | No    |
| L203N/R207T | <a href="#">3bol</a> | B     | N190 | T194 | 0.46 | -0.082           | No    |
| F143Q/A147Y | <a href="#">1c27</a> | A     | Q130 | Y134 | 0.15 | -0.08            | No    |
| W434Y/V438Y | <a href="#">3i0z</a> | A     | Y292 | Y296 | 0.5  | -0.073           | No    |
| V321E/G325S | <a href="#">2z84</a> | A     | E163 | S167 | 0.35 | -0.069           | No    |
| H201N/V205T | <a href="#">3bol</a> | B     | N190 | T194 | 0.45 | -0.05            | No    |
| S373N/Q377T | <a href="#">3bol</a> | B     | N190 | T194 | 0.36 | -0.046           | No    |
| Y101Q/V105Y | <a href="#">1c27</a> | A     | Q130 | Y134 | 0.3  | -0.042           | No    |
| V144S/E148D | <a href="#">4iqg</a> | B     | S37  | D41  | 0.47 | -0.04            | No    |
| V199Q/L203Y | <a href="#">1c27</a> | A     | Q130 | Y134 | 0.18 | -0.04            | No    |
| V199Y/L203T | <a href="#">4cae</a> | C     | Y88  | T92  | 0.23 | -0.038           | No    |
| R371Y/M375T | <a href="#">4cae</a> | C     | Y88  | T92  | 0.26 | -0.033           | No    |
| Y334N/H338T | <a href="#">3bol</a> | B     | N190 | T194 | 0.32 | -0.028           | No    |
| D99N/R103T  | <a href="#">3bol</a> | B     | N190 | T194 | 0.46 | -0.024           | No    |
| S373Q/Q377R | <a href="#">2x1c</a> | B     | Q196 | R200 | 0.25 | -0.015           | No    |
| D369R/S373R | <a href="#">1qtx</a> | B     | R12  | R16  | 0.47 | -0.008           | No    |
| Q376N/V380T | <a href="#">3bol</a> | B     | N190 | T194 | 0.5  | -0.005           | No    |
| E233Q/A237R | <a href="#">2x1c</a> | B     | Q196 | R200 | 0.49 | 0.023            | No    |
| V264S/A268H | <a href="#">4toh</a> | B     | S126 | H130 | 0.25 | 0.023            | No    |

| Mutation    | Template             | Chain | R1   | R2   | RMSD | $\Delta\Delta G$ | Clash |
|-------------|----------------------|-------|------|------|------|------------------|-------|
| I3Q/E445N   | <a href="#">2jjo</a> | A     | Q292 | N313 | 0.48 | 0.031            | No    |
| W434S/V438Y | <a href="#">3r3r</a> | A     | S159 | Y163 | 0.44 | 0.031            | No    |
| F146W/M150W | <a href="#">4tf4</a> | A     | W287 | W291 | 0.38 | 0.033            | No    |
| H195S/V199Y | <a href="#">3r3r</a> | A     | S159 | Y163 | 0.48 | 0.038            | No    |
| I140N/V144E | <a href="#">4dno</a> | B     | N233 | E237 | 0.42 | 0.038            | No    |
| V321T/G325D | <a href="#">5df7</a> | B     | T168 | D172 | 0.44 | 0.049            | No    |
| T189N/V193T | <a href="#">3bol</a> | B     | N190 | T194 | 0.35 | 0.069            | No    |
| H195N/V199T | <a href="#">3bol</a> | B     | N190 | T194 | 0.4  | 0.07             | No    |
| V380K/H387R | <a href="#">4r0y</a> | A     | K827 | R834 | 0.48 | 0.071            | No    |
| Y334H/H338W | <a href="#">4enq</a> | D     | H251 | W255 | 0.28 | 0.084            | No    |
| W434Y/V438T | <a href="#">4cae</a> | C     | Y88  | T92  | 0.33 | 0.099            | No    |
| I3N/E445S   | <a href="#">3o4l</a> | L     | N161 | S177 | 0.32 | 0.104            | No    |
| V199H/L203W | <a href="#">4enq</a> | D     | H251 | W255 | 0.31 | 0.107            | No    |
| Q376S/V380D | <a href="#">4iqg</a> | B     | S37  | D41  | 0.5  | 0.114            | No    |
| H102N/D106T | <a href="#">3bol</a> | B     | N190 | T194 | 0.32 | 0.124            | No    |
| I140S/V144Q | <a href="#">2ao9</a> | C     | S96  | Q100 | 0.11 | 0.126            | No    |
| Y100S/V104Y | <a href="#">3r3r</a> | A     | S159 | Y163 | 0.49 | 0.132            | No    |
| A147N/F151E | <a href="#">4dno</a> | B     | N233 | E237 | 0.39 | 0.137            | No    |
| Y61N/I65Y   | <a href="#">3v1w</a> | B     | N375 | Y379 | 0.46 | 0.14             | No    |
| V205N/R209T | <a href="#">3bol</a> | B     | N190 | T194 | 0.34 | 0.142            | No    |
| L124D/Q129E | <a href="#">4cku</a> | E     | D137 | E142 | 0.4  | 0.146            | No    |
| Y433W/N437T | <a href="#">1c5v</a> | A     | W237 | T241 | 0.44 | 0.146            | No    |



| Mutation    | Template             | Chain | R1   | R2   | RMSD | $\Delta\Delta G$ | Clash |
|-------------|----------------------|-------|------|------|------|------------------|-------|
| G332S/V336D | <a href="#">4iqg</a> | B     | S37  | D41  | 0.42 | 0.153            | No    |
| A147S/F151Y | <a href="#">3r3r</a> | A     | S159 | Y163 | 0.43 | 0.167            | No    |
| V199N/L203Y | <a href="#">3vlw</a> | B     | N375 | Y379 | 0.25 | 0.172            | No    |
| L173E/V179N | <a href="#">4jzk</a> | B     | E185 | N190 | 0.45 | 0.175            | No    |
| V104N/L108Y | <a href="#">3vlw</a> | B     | N375 | Y379 | 0.3  | 0.182            | No    |
| Y61N/I65E   | <a href="#">4dno</a> | B     | N233 | E237 | 0.47 | 0.183            | No    |
| T189H/V193S | <a href="#">1p7g</a> | H     | H87  | S91  | 0.4  | 0.188            | No    |
| Y432S/R436Q | <a href="#">2ao9</a> | C     | S96  | Q100 | 0.23 | 0.191            | No    |
| F143S/A147Y | <a href="#">3r3r</a> | A     | S159 | Y163 | 0.43 | 0.194            | No    |
| S373H/Q377W | <a href="#">4enq</a> | D     | H251 | W255 | 0.27 | 0.201            | No    |
| Y101N/V105E | <a href="#">4dno</a> | B     | N233 | E237 | 0.48 | 0.203            | No    |
| V199S/L203Y | <a href="#">3r3r</a> | A     | S159 | Y163 | 0.48 | 0.207            | No    |
| Y374S/H378Y | <a href="#">3r3r</a> | A     | S159 | Y163 | 0.45 | 0.213            | No    |
| Q141N/Q145T | <a href="#">3bol</a> | B     | N190 | T194 | 0.43 | 0.22             | No    |
| V93N/L98S   | <a href="#">4zty</a> | A     | N304 | S309 | 0.49 | 0.221            | No    |
| Y334H/H338N | <a href="#">4hmm</a> | B     | H177 | N181 | 0.17 | 0.227            | No    |
| S373K/Q377H | <a href="#">2ifq</a> | A     | K39  | H43  | 0.27 | 0.236            | No    |
| Y374H/H378N | <a href="#">4hmm</a> | B     | H177 | N181 | 0.23 | 0.247            | No    |
| H378T/V382H | <a href="#">3vpc</a> | C     | T148 | H152 | 0.22 | 0.263            | No    |
| I3S/E445T   | <a href="#">3oh8</a> | A     | S6   | T106 | 0.33 | 0.265            | No    |
| W434N/V438T | <a href="#">3bol</a> | B     | N190 | T194 | 0.39 | 0.266            | No    |
| I372N/Q376T | <a href="#">3bol</a> | B     | N190 | T194 | 0.35 | 0.274            | No    |

| <b>Mutation</b> | <b>Template</b>      | <b>Chain</b> | <b>R1</b> | <b>R2</b> | <b>RMSD</b> | <b><math>\Delta\Delta G</math></b> | <b>Clash</b> |
|-----------------|----------------------|--------------|-----------|-----------|-------------|------------------------------------|--------------|
| E148N/R152T     | <a href="#">3bol</a> | B            | N190      | T194      | 0.19        | 0.278                              | No           |
| G97T/Y101H      | <a href="#">3vpc</a> | C            | T148      | H152      | 0.28        | 0.279                              | No           |
| V144N/E148T     | <a href="#">3bol</a> | B            | N190      | T194      | 0.35        | 0.279                              | No           |
| Y435S/V439Y     | <a href="#">3r3r</a> | A            | S159      | Y163      | 0.47        | 0.286                              | No           |
| V419S/R426Y     | <a href="#">1k8k</a> | D            | S166      | Y222      | 0.46        | 0.288                              | No           |
| V199N/L203E     | <a href="#">4dno</a> | B            | N233      | E237      | 0.46        | 0.294                              | No           |
| Y334H/H338S     | <a href="#">1p7g</a> | H            | H87       | S91       | 0.42        | 0.296                              | No           |
| Y374N/H378T     | <a href="#">3bol</a> | B            | N190      | T194      | 0.32        | 0.299                              | No           |
| M290D/Y349W     | <a href="#">1xtb</a> | A            | D150      | W181      | 0.48        | 0.308                              | No           |
| S373H/Q377Y     | <a href="#">1xh8</a> | A            | H142      | Y146      | 0.29        | 0.309                              | No           |
| D265R/E269R     | <a href="#">1qtx</a> | B            | R12       | R16       | 0.37        | 0.318                              | No           |
| W434H/V438N     | <a href="#">4hmm</a> | B            | H177      | N181      | 0.3         | 0.32                               | No           |
| G194T/L198R     | <a href="#">3mux</a> | A            | T233      | R237      | 0.49        | 0.321                              | No           |
| I140S/V144D     | <a href="#">4iqg</a> | B            | S37       | D41       | 0.49        | 0.324                              | No           |
| E233W/A237Y     | <a href="#">5std</a> | C            | W26       | Y30       | 0.47        | 0.338                              | No           |
| V105N/N109T     | <a href="#">3bol</a> | B            | N190      | T194      | 0.32        | 0.338                              | No           |
| L187T/I191Q     | <a href="#">3c9x</a> | A            | T109      | Q113      | 0.46        | 0.346                              | No           |
| T149H/E153N     | <a href="#">4hmm</a> | B            | H177      | N181      | 0.43        | 0.346                              | No           |
| Y101S/V105Y     | <a href="#">3r3r</a> | A            | S159      | Y163      | 0.47        | 0.351                              | No           |
| V419E/Q424N     | <a href="#">2gop</a> | B            | E48       | N53       | 0.38        | 0.355                              | No           |
| T149N/E153T     | <a href="#">3bol</a> | B            | N190      | T194      | 0.24        | 0.358                              | No           |
| D235N/C239T     | <a href="#">3bol</a> | B            | N190      | T194      | 0.42        | 0.363                              | No           |

| Mutation    | Template             | Chain | R1   | R2   | RMSD | $\Delta\Delta G$ | Clash |
|-------------|----------------------|-------|------|------|------|------------------|-------|
| W12S/Y395W  | <a href="#">5cgm</a> | A     | S228 | W526 | 0.48 | 0.366            | No    |
| G194S/L198H | <a href="#">4toh</a> | B     | S126 | H130 | 0.26 | 0.369            | No    |
| Q188N/D192T | <a href="#">3bol</a> | B     | N190 | T194 | 0.39 | 0.369            | No    |
| C239N/I243T | <a href="#">3bol</a> | B     | N190 | T194 | 0.21 | 0.371            | No    |
| I191N/H195T | <a href="#">3bol</a> | B     | N190 | T194 | 0.24 | 0.381            | No    |
| I372S/Q376H | <a href="#">4toh</a> | B     | S126 | H130 | 0.31 | 0.386            | No    |
| F146Y/M150T | <a href="#">4cae</a> | C     | Y88  | T92  | 0.28 | 0.398            | No    |
| E233S/A237K | <a href="#">4kn8</a> | B     | S26  | K30  | 0.46 | 0.399            | No    |
| I140N/V144T | <a href="#">3bol</a> | B     | N190 | T194 | 0.45 | 0.404            | No    |
| F172T/M176N | <a href="#">3vc8</a> | B     | T65  | N69  | 0.46 | 0.414            | No    |
| R371H/M375N | <a href="#">4hmm</a> | B     | H177 | N181 | 0.19 | 0.445            | No    |
| H195S/V199H | <a href="#">4toh</a> | B     | S126 | H130 | 0.17 | 0.463            | No    |
| S373K/Q377N | <a href="#">3lk4</a> | W     | K237 | N241 | 0.3  | 0.472            | No    |
| H201T/V205H | <a href="#">3vpc</a> | C     | T148 | H152 | 0.25 | 0.475            | No    |
| Y432S/R436K | <a href="#">4kn8</a> | B     | S26  | K30  | 0.25 | 0.475            | No    |
| C169S/L173K | <a href="#">2fv0</a> | B     | S94  | K98  | 0.35 | 0.483            | No    |
| E233T/A237Q | <a href="#">3c9x</a> | A     | T109 | Q113 | 0.43 | 0.494            | No    |
| V199H/L203N | <a href="#">4hmm</a> | B     | H177 | N181 | 0.19 | 0.496            | No    |
| V321T/G325R | <a href="#">2v3v</a> | A     | T704 | R709 | 0.41 | 0.518            | No    |
| E233W/A237S | <a href="#">2ejj</a> | C     | W146 | S150 | 0.49 | 0.524            | No    |
| I291K/I348Y | <a href="#">3n29</a> | A     | K35  | Y231 | 0.45 | 0.524            | No    |
| Y76E/I113W  | <a href="#">2bwa</a> | A     | E124 | W161 | 0.5  | 0.538            | No    |

| Mutation    | Template             | Chain | R1   | R2   | RMSD | $\Delta\Delta G$ | Clash |
|-------------|----------------------|-------|------|------|------|------------------|-------|
| I3N/W443D   | <a href="#">1aoz</a> | B     | N228 | D253 | 0.35 | 0.539            | No    |
| W434S/V438H | <a href="#">4toh</a> | B     | S126 | H130 | 0.27 | 0.546            | No    |
| G97S/Y101H  | <a href="#">4toh</a> | B     | S126 | H130 | 0.26 | 0.574            | No    |
| L333Y/L337T | <a href="#">4cae</a> | C     | Y88  | T92  | 0.22 | 0.574            | No    |
| L263Q/F267H | <a href="#">2gj3</a> | A     | Q29  | H33  | 0.4  | 0.576            | No    |
| Y334N/H338K | <a href="#">1k0n</a> | A     | N179 | K183 | 0.49 | 0.579            | No    |
| Q188R/D192N | <a href="#">3ix8</a> | A     | R137 | N141 | 0.48 | 0.583            | No    |
| V199Q/L203R | <a href="#">2x1c</a> | B     | Q196 | R200 | 0.18 | 0.591            | No    |
| F143Q/A147R | <a href="#">2x1c</a> | B     | Q196 | R200 | 0.16 | 0.615            | No    |
| H201S/V205H | <a href="#">4toh</a> | B     | S126 | H130 | 0.25 | 0.616            | No    |
| A147D/F151N | <a href="#">4nac</a> | B     | D65  | N69  | 0.43 | 0.619            | No    |
| V382N/I386T | <a href="#">3bol</a> | B     | N190 | T194 | 0.36 | 0.621            | No    |
| Y435H/V439N | <a href="#">4hmm</a> | B     | H177 | N181 | 0.35 | 0.627            | No    |
| V199N/L203T | <a href="#">3bol</a> | B     | N190 | T194 | 0.28 | 0.635            | No    |
| L333D/L337W | <a href="#">4ggo</a> | A     | D205 | W209 | 0.23 | 0.637            | No    |
| V144H/E148N | <a href="#">4hmm</a> | B     | H177 | N181 | 0.21 | 0.637            | No    |
| W434Q/V438R | <a href="#">2x1c</a> | B     | Q196 | R200 | 0.32 | 0.641            | No    |
| V104H/L108N | <a href="#">4hmm</a> | B     | H177 | N181 | 0.17 | 0.642            | No    |
| H195K/V199N | <a href="#">3lk4</a> | W     | K237 | N241 | 0.3  | 0.654            | No    |
| H378S/V382H | <a href="#">4toh</a> | B     | S126 | H130 | 0.14 | 0.654            | No    |
| V93S/L98K   | <a href="#">1g8k</a> | C     | S809 | K814 | 0.36 | 0.654            | No    |
| F146W/M150S | <a href="#">2ejj</a> | C     | W146 | S150 | 0.2  | 0.663            | No    |

| <b>Mutation</b> | <b>Template</b>      | <b>Chain</b> | <b>R1</b> | <b>R2</b> | <b>RMSD</b> | <b><math>\Delta\Delta G</math></b> | <b>Clash</b> |
|-----------------|----------------------|--------------|-----------|-----------|-------------|------------------------------------|--------------|
| E62N/R66T       | <a href="#">3bol</a> | B            | N190      | T194      | 0.39        | 0.664                              | No           |
| A147H/F151N     | <a href="#">4hmm</a> | B            | H177      | N181      | 0.23        | 0.665                              | No           |
| F146H/M150Y     | <a href="#">1xh8</a> | A            | H142      | Y146      | 0.18        | 0.671                              | No           |
| Y432H/R436S     | <a href="#">1p7g</a> | H            | H87       | S91       | 0.31        | 0.682                              | No           |
| Y435N/V439T     | <a href="#">3bol</a> | B            | N190      | T194      | 0.29        | 0.688                              | No           |
| Y435Q/V439K     | <a href="#">4a9o</a> | C            | Q80       | K84       | 0.43        | 0.694                              | No           |
| D280S/I284D     | <a href="#">4iqg</a> | B            | S37       | D41       | 0.44        | 0.7                                | No           |
| V419S/R426T     | <a href="#">3oh8</a> | A            | S6        | T106      | 0.47        | 0.705                              | No           |
| T139N/F143T     | <a href="#">3bol</a> | B            | N190      | T194      | 0.44        | 0.706                              | No           |
| E63N/L67T       | <a href="#">3bol</a> | B            | N190      | T194      | 0.35        | 0.712                              | No           |
| A147S/F151H     | <a href="#">4toh</a> | B            | S126      | H130      | 0.25        | 0.714                              | No           |
| H201S/V205K     | <a href="#">4kn8</a> | B            | S26       | K30       | 0.23        | 0.716                              | No           |
| Y100H/V104N     | <a href="#">4hmm</a> | B            | H177      | N181      | 0.25        | 0.718                              | No           |
| Y61H/I65N       | <a href="#">4hmm</a> | B            | H177      | N181      | 0.47        | 0.718                              | No           |
| V199S/L203H     | <a href="#">4toh</a> | B            | S126      | H130      | 0.25        | 0.722                              | No           |
| C239S/I243H     | <a href="#">4toh</a> | B            | S126      | H130      | 0.41        | 0.724                              | No           |
| A147H/F151S     | <a href="#">1p7g</a> | H            | H87       | S91       | 0.38        | 0.738                              | No           |
| V104N/L108E     | <a href="#">4dno</a> | B            | N233      | E237      | 0.47        | 0.738                              | No           |
| I3W/E445S       | <a href="#">2xgn</a> | A            | W91       | S105      | 0.32        | 0.744                              | No           |
| V382S/I386H     | <a href="#">4toh</a> | B            | S126      | H130      | 0.25        | 0.749                              | No           |
| I372S/Q376K     | <a href="#">4kn8</a> | B            | S26       | K30       | 0.14        | 0.75                               | No           |
| V193N/L197T     | <a href="#">3bol</a> | B            | N190      | T194      | 0.35        | 0.751                              | No           |

| Mutation    | Template             | Chain | R1   | R2   | RMSD | $\Delta\Delta G$ | Clash |
|-------------|----------------------|-------|------|------|------|------------------|-------|
| Y100N/V104T | <a href="#">3bol</a> | B     | N190 | T194 | 0.34 | 0.76             | No    |
| F143N/A147T | <a href="#">3bol</a> | B     | N190 | T194 | 0.37 | 0.763            | No    |
| R371S/M375H | <a href="#">4toh</a> | B     | S126 | H130 | 0.3  | 0.766            | No    |
| Y374K/H378N | <a href="#">3lk4</a> | W     | K237 | N241 | 0.32 | 0.78             | No    |
| W434K/V438N | <a href="#">3lk4</a> | W     | K237 | N241 | 0.33 | 0.793            | No    |
| W434N/V438K | <a href="#">1k0n</a> | A     | N179 | K183 | 0.49 | 0.797            | No    |
| V199D/L203N | <a href="#">4nac</a> | B     | D65  | N69  | 0.44 | 0.799            | No    |
| H201K/V205H | <a href="#">2ifq</a> | A     | K39  | H43  | 0.26 | 0.811            | No    |
| Y374H/H378S | <a href="#">1p7g</a> | H     | H87  | S91  | 0.48 | 0.816            | No    |
| V199H/L203S | <a href="#">1p7g</a> | H     | H87  | S91  | 0.43 | 0.82             | No    |
| A147S/F151D | <a href="#">4iqg</a> | B     | S37  | D41  | 0.49 | 0.821            | No    |
| V419Q/R426N | <a href="#">2jjo</a> | A     | Q292 | N313 | 0.45 | 0.825            | No    |
| Y334R/H338N | <a href="#">3ix8</a> | A     | R137 | N141 | 0.45 | 0.825            | No    |
| Y61T/I65H   | <a href="#">3vpc</a> | C     | T148 | H152 | 0.45 | 0.825            | No    |
| L187T/I191S | <a href="#">3hh1</a> | C     | T43  | S47  | 0.28 | 0.827            | No    |
| F4S/L444W   | <a href="#">2bi0</a> | A     | S311 | W330 | 0.36 | 0.833            | No    |
| R371D/M375N | <a href="#">4nac</a> | B     | D65  | N69  | 0.4  | 0.839            | No    |
| V104K/L108H | <a href="#">2ifq</a> | A     | K39  | H43  | 0.29 | 0.841            | No    |
| V104H/L108S | <a href="#">1p7g</a> | H     | H87  | S91  | 0.39 | 0.844            | No    |
| V144H/E148S | <a href="#">1p7g</a> | H     | H87  | S91  | 0.43 | 0.849            | No    |
| Y101N/V105T | <a href="#">3bol</a> | B     | N190 | T194 | 0.32 | 0.853            | No    |
| H201S/V205D | <a href="#">4iqg</a> | B     | S37  | D41  | 0.48 | 0.863            | No    |

| Mutation    | Template             | Chain | R1   | R2   | RMSD | $\Delta\Delta G$ | Clash |
|-------------|----------------------|-------|------|------|------|------------------|-------|
| V104S/L108H | <a href="#">4toh</a> | B     | S126 | H130 | 0.27 | 0.864            | No    |
| E233T/A237S | <a href="#">3hh1</a> | C     | T43  | S47  | 0.34 | 0.865            | No    |
| F143H/A147S | <a href="#">1p7g</a> | H     | H87  | S91  | 0.41 | 0.881            | No    |
| R371H/M375S | <a href="#">1p7g</a> | H     | H87  | S91  | 0.43 | 0.883            | No    |
| E233H/A237N | <a href="#">4hmm</a> | B     | H177 | N181 | 0.45 | 0.891            | No    |
| V104T/L108R | <a href="#">3mux</a> | A     | T233 | R237 | 0.5  | 0.895            | No    |
| V199R/L203N | <a href="#">3ix8</a> | A     | R137 | N141 | 0.48 | 0.9              | No    |
| E148N/R152Y | <a href="#">3vlw</a> | B     | N375 | Y379 | 0.4  | 0.91             | No    |
| I293H/I348T | <a href="#">3l6d</a> | B     | H143 | T164 | 0.36 | 0.913            | No    |
| Y61S/I65D   | <a href="#">4iqg</a> | B     | S37  | D41  | 0.25 | 0.918            | No    |
| V419N/R426S | <a href="#">3o4l</a> | L     | N161 | S177 | 0.47 | 0.926            | No    |
| V104N/L108T | <a href="#">3bol</a> | B     | N190 | T194 | 0.35 | 0.928            | No    |
| V193S/L197H | <a href="#">4toh</a> | B     | S126 | H130 | 0.33 | 0.932            | No    |
| Y334S/H338K | <a href="#">4kn8</a> | B     | S26  | K30  | 0.17 | 0.938            | No    |
| V199K/L203H | <a href="#">2ifq</a> | A     | K39  | H43  | 0.3  | 0.941            | No    |
| F172N/I191R | <a href="#">1t2b</a> | A     | N146 | R245 | 0.42 | 0.944            | No    |
| V193H/L197N | <a href="#">4hmm</a> | B     | H177 | N181 | 0.22 | 0.946            | No    |
| Y61S/I65H   | <a href="#">4toh</a> | B     | S126 | H130 | 0.48 | 0.946            | No    |
| Y100S/V104H | <a href="#">4toh</a> | B     | S126 | H130 | 0.26 | 0.951            | No    |
| R371N/M375T | <a href="#">3bol</a> | B     | N190 | T194 | 0.3  | 0.954            | No    |
| M375N/L379E | <a href="#">4dno</a> | B     | N233 | E237 | 0.28 | 0.957            | No    |
| V104D/L108N | <a href="#">4nac</a> | B     | D65  | N69  | 0.49 | 0.962            | No    |

| Mutation    | Template             | Chain | R1   | R2   | RMSD | $\Delta\Delta G$ | Clash |
|-------------|----------------------|-------|------|------|------|------------------|-------|
| V336T/L340H | <a href="#">3vpc</a> | C     | T148 | H152 | 0.4  | 0.976            | No    |
| Y435H/V439S | <a href="#">1p7g</a> | H     | H87  | S91  | 0.49 | 0.978            | No    |
| I140T/V199K | <a href="#">2prb</a> | A     | T120 | K156 | 0.48 | 0.998            | No    |
| F143S/A147D | <a href="#">4iqg</a> | B     | S37  | D41  | 0.49 | 1.026            | No    |
| Y433S/N437K | <a href="#">4kn8</a> | B     | S26  | K30  | 0.33 | 1.035            | No    |
| D280S/I284H | <a href="#">4toh</a> | B     | S126 | H130 | 0.35 | 1.049            | No    |
| W434S/V438K | <a href="#">4kn8</a> | B     | S26  | K30  | 0.34 | 1.069            | No    |
| E233T/A237R | <a href="#">3mux</a> | A     | T233 | R237 | 0.19 | 1.071            | No    |
| R371S/M375K | <a href="#">4kn8</a> | B     | S26  | K30  | 0.15 | 1.075            | No    |
| Y374S/H378K | <a href="#">4kn8</a> | B     | S26  | K30  | 0.23 | 1.093            | No    |
| F143K/A147N | <a href="#">3lk4</a> | W     | K237 | N241 | 0.29 | 1.104            | No    |
| V199S/L203K | <a href="#">4kn8</a> | B     | S26  | K30  | 0.15 | 1.107            | No    |
| Y374R/H378N | <a href="#">3ix8</a> | A     | R137 | N141 | 0.49 | 1.11             | No    |
| Y61T/I65S   | <a href="#">3hh1</a> | C     | T43  | S47  | 0.41 | 1.117            | No    |
| L187K/I191H | <a href="#">2ifq</a> | A     | K39  | H43  | 0.42 | 1.13             | No    |
| I140S/V199D | <a href="#">4nac</a> | B     | S27  | D65  | 0.48 | 1.141            | No    |
| L263D/F267N | <a href="#">4nac</a> | B     | D65  | N69  | 0.48 | 1.152            | No    |
| L263S/F267H | <a href="#">4toh</a> | B     | S126 | H130 | 0.27 | 1.157            | No    |
| Y101S/V105H | <a href="#">4toh</a> | B     | S126 | H130 | 0.39 | 1.166            | No    |
| A147S/F151K | <a href="#">4kn8</a> | B     | S26  | K30  | 0.16 | 1.17             | No    |
| R241S/L245T | <a href="#">3a5s</a> | B     | S277 | T281 | 0.46 | 1.171            | No    |
| V193H/L197S | <a href="#">1p7g</a> | H     | H87  | S91  | 0.37 | 1.182            | No    |



| Mutation    | Template             | Chain | R1   | R2   | RMSD | $\Delta\Delta G$ | Clash |
|-------------|----------------------|-------|------|------|------|------------------|-------|
| Y100K/V104N | <a href="#">3lk4</a> | W     | K237 | N241 | 0.34 | 1.195            | No    |
| S373H/Q377S | <a href="#">1p7g</a> | H     | H87  | S91  | 0.37 | 1.197            | No    |
| I293S/I348H | <a href="#">8dfc</a> | A     | S6   | H131 | 0.49 | 1.213            | No    |
| W434K/V438H | <a href="#">2ifq</a> | A     | K39  | H43  | 0.4  | 1.215            | No    |
| F146H/M150N | <a href="#">4hmm</a> | B     | H177 | N181 | 0.18 | 1.218            | No    |
| Y435K/V439H | <a href="#">2ifq</a> | A     | K39  | H43  | 0.39 | 1.238            | No    |
| Y435H/V439K | <a href="#">1k3t</a> | C     | H349 | K353 | 0.48 | 1.25             | No    |
| Q95R/D99N   | <a href="#">3ix8</a> | A     | R137 | N141 | 0.36 | 1.251            | No    |
| L251K/Y255T | <a href="#">4ds4</a> | D     | K582 | T586 | 0.39 | 1.267            | No    |
| L108D/I113N | <a href="#">4k38</a> | B     | D228 | N233 | 0.43 | 1.275            | No    |
| V104S/L108D | <a href="#">4iqg</a> | B     | S37  | D41  | 0.5  | 1.284            | No    |
| F146R/M150N | <a href="#">3ix8</a> | A     | R137 | N141 | 0.48 | 1.304            | No    |
| Y100K/V104H | <a href="#">2ifq</a> | A     | K39  | H43  | 0.34 | 1.31             | No    |
| Y100S/V104K | <a href="#">4kn8</a> | B     | S26  | K30  | 0.3  | 1.31             | No    |
| D347R/K393R | <a href="#">4rpo</a> | B     | R195 | R225 | 0.38 | 1.329            | No    |
| Y374H/H378K | <a href="#">1k3t</a> | C     | H349 | K353 | 0.42 | 1.329            | No    |
| F143S/A147K | <a href="#">4kn8</a> | B     | S26  | K30  | 0.21 | 1.342            | No    |
| Y61T/I65R   | <a href="#">3mux</a> | A     | T233 | R237 | 0.48 | 1.347            | No    |
| L333K/L337H | <a href="#">2ifq</a> | A     | K39  | H43  | 0.3  | 1.351            | No    |
| V336S/L340H | <a href="#">4toh</a> | B     | S126 | H130 | 0.39 | 1.356            | No    |
| Q261R/D265N | <a href="#">3ix8</a> | A     | R137 | N141 | 0.26 | 1.359            | No    |
| L333N/L337E | <a href="#">4dno</a> | B     | N233 | E237 | 0.47 | 1.367            | No    |

| Mutation    | Template             | Chain | R1   | R2   | RMSD | $\Delta\Delta G$ | Clash |
|-------------|----------------------|-------|------|------|------|------------------|-------|
| D280T/I284R | <a href="#">3mux</a> | A     | T233 | R237 | 0.49 | 1.392            | No    |
| L333H/L337N | <a href="#">4hmm</a> | B     | H177 | N181 | 0.19 | 1.402            | No    |
| M375T/L379H | <a href="#">3vpc</a> | C     | T148 | H152 | 0.27 | 1.41             | No    |
| L187S/I191D | <a href="#">4iqg</a> | B     | S37  | D41  | 0.33 | 1.42             | No    |
| V193S/L197D | <a href="#">4iqg</a> | B     | S37  | D41  | 0.45 | 1.424            | No    |
| E335R/Y339H | <a href="#">4xv8</a> | A     | R48  | H52  | 0.15 | 1.43             | No    |
| Y61S/I65K   | <a href="#">4kn8</a> | B     | S26  | K30  | 0.4  | 1.437            | No    |
| L333N/L337T | <a href="#">3bol</a> | B     | N190 | T194 | 0.35 | 1.46             | No    |
| L333R/L337N | <a href="#">3ix8</a> | A     | R137 | N141 | 0.44 | 1.475            | No    |
| L333H/L337S | <a href="#">1p7g</a> | H     | H87  | S91  | 0.35 | 1.513            | No    |
| F146D/M150N | <a href="#">4nac</a> | B     | D65  | N69  | 0.48 | 1.519            | No    |
| L263K/F267N | <a href="#">3lk4</a> | W     | K237 | N241 | 0.32 | 1.524            | No    |
| M375S/L379H | <a href="#">4toh</a> | B     | S126 | H130 | 0.31 | 1.55             | No    |
| M375D/L379N | <a href="#">4nac</a> | B     | D65  | N69  | 0.46 | 1.554            | No    |
| F146K/M150H | <a href="#">2ifq</a> | A     | K39  | H43  | 0.29 | 1.557            | No    |
| L333S/L337H | <a href="#">4toh</a> | B     | S126 | H130 | 0.34 | 1.558            | No    |
| I293D/I348T | <a href="#">1qvj</a> | A     | D172 | T282 | 0.41 | 1.582            | No    |
| L333K/L337N | <a href="#">3lk4</a> | W     | K237 | N241 | 0.33 | 1.586            | No    |
| I293E/I348N | <a href="#">1p3j</a> | A     | E114 | N194 | 0.45 | 1.596            | No    |
| L263S/F267K | <a href="#">4kn8</a> | B     | S26  | K30  | 0.2  | 1.603            | No    |
| F146H/M150S | <a href="#">1p7g</a> | H     | H87  | S91  | 0.45 | 1.608            | No    |
| V336K/L340N | <a href="#">3lk4</a> | W     | K237 | N241 | 0.41 | 1.615            | No    |

| Mutation    | Template             | Chain | R1   | R2   | RMSD | $\Delta\Delta G$ | Clash |
|-------------|----------------------|-------|------|------|------|------------------|-------|
| Y101S/V105K | <a href="#">4kn8</a> | B     | S26  | K30  | 0.26 | 1.641            | No    |
| F146N/M150T | <a href="#">3bol</a> | B     | N190 | T194 | 0.3  | 1.658            | No    |
| F146S/M150H | <a href="#">4toh</a> | B     | S126 | H130 | 0.26 | 1.666            | No    |
| V336S/L340K | <a href="#">4kn8</a> | B     | S26  | K30  | 0.37 | 1.675            | No    |
| I348D/V392D | <a href="#">2fem</a> | A     | D148 | D203 | 0.4  | 1.716            | No    |
| L333D/L337N | <a href="#">4nac</a> | B     | D65  | N69  | 0.46 | 1.738            | No    |
| F6R/F10Y    | <a href="#">3vaj</a> | B     | R228 | Y232 | 0.34 | 1.739            | No    |
| M375S/L379D | <a href="#">4iqg</a> | B     | S37  | D41  | 0.44 | 1.75             | No    |
| D106N/D110T | <a href="#">3bol</a> | B     | N190 | T194 | 0.38 | 1.786            | No    |
| L333S/L337D | <a href="#">4iqg</a> | B     | S37  | D41  | 0.47 | 1.854            | No    |
| I293E/I348D | <a href="#">4nu0</a> | A     | E115 | D190 | 0.46 | 1.887            | No    |
| M375S/L379K | <a href="#">4kn8</a> | B     | S26  | K30  | 0.21 | 2.013            | No    |
| E63H/L67N   | <a href="#">4hmm</a> | B     | H177 | N181 | 0.27 | 2.039            | No    |
| F146S/M150K | <a href="#">4kn8</a> | B     | S26  | K30  | 0.21 | 2.048            | No    |
| L333S/L337K | <a href="#">4kn8</a> | B     | S26  | K30  | 0.13 | 2.075            | No    |
| W266K/Q270R | <a href="#">1s2w</a> | A     | K102 | R106 | 0.36 | 2.212            | No    |

Showing 1 to 344 of 344 entries

Table S6. Two-hundred seventy-two mutants suggested for the lysozyme (2LZM) used in the second case study.

*Proteus* ID: SYLX52. Available at <<http://proteus.dcc.ufmg.br/result/id/SYLX52>>.

| Mutation    | Template             | Chain | R1   | R2   | RMSD | $\Delta\Delta G$ | Clash |
|-------------|----------------------|-------|------|------|------|------------------|-------|
| D127Q/V131R | <a href="#">2x1c</a> | B     | Q196 | R200 | 0.31 | -1.506           | No    |
| D127T/V131R | <a href="#">3mux</a> | A     | T233 | R237 | 0.5  | -1.461           | No    |
| D127R/V131R | <a href="#">1qtx</a> | B     | R12  | R16  | 0.24 | -1.287           | No    |
| D127R/V131N | <a href="#">3ix8</a> | A     | R137 | N141 | 0.48 | -1.234           | No    |
| D127W/V131Q | <a href="#">2q79</a> | A     | W339 | Q343 | 0.27 | -1.215           | No    |
| K147R/T151R | <a href="#">1qtx</a> | B     | R12  | R16  | 0.31 | -1.181           | No    |
| D127S/V131K | <a href="#">4kn8</a> | B     | S26  | K30  | 0.27 | -1.165           | No    |
| D127H/V131N | <a href="#">4hmm</a> | B     | H177 | N181 | 0.24 | -1.023           | No    |
| D127W/V131S | <a href="#">2ejj</a> | C     | W146 | S150 | 0.25 | -0.947           | No    |
| T109K/G113N | <a href="#">3lk4</a> | W     | K237 | N241 | 0.47 | -0.923           | No    |
| D127W/V131W | <a href="#">4tf4</a> | A     | W287 | W291 | 0.34 | -0.785           | No    |
| D70K/G77R   | <a href="#">4r0y</a> | A     | K827 | R834 | 0.32 | -0.768           | No    |
| K147Q/T151Y | <a href="#">1c27</a> | A     | Q130 | Y134 | 0.32 | -0.751           | No    |
| D127Y/V131Y | <a href="#">3i0z</a> | A     | Y292 | Y296 | 0.45 | -0.72            | No    |
| D72N/R76E   | <a href="#">4dno</a> | B     | N233 | E237 | 0.46 | -0.69            | No    |
| K147Q/T151R | <a href="#">2x1c</a> | B     | Q196 | R200 | 0.22 | -0.666           | No    |
| D127W/V131T | <a href="#">1c5v</a> | A     | W237 | T241 | 0.39 | -0.665           | No    |
| D127H/V131S | <a href="#">1p7g</a> | H     | H87  | S91  | 0.46 | -0.605           | No    |
| D127K/V131H | <a href="#">2ifq</a> | A     | K39  | H43  | 0.34 | -0.578           | No    |
| D127Y/V131T | <a href="#">4cae</a> | C     | Y88  | T92  | 0.32 | -0.564           | No    |

| <b>Mutation</b> | <b>Template</b>      | <b>Chain</b> | <b>R1</b> | <b>R2</b> | <b>RMSD</b> | <b><math>\Delta\Delta G</math></b> | <b>Clash</b> |
|-----------------|----------------------|--------------|-----------|-----------|-------------|------------------------------------|--------------|
| A73Q/G77R       | <a href="#">2x1c</a> | B            | Q196      | R200      | 0.14        | -0.552                             | No           |
| D61R/K65R       | <a href="#">1qtx</a> | B            | R12       | R16       | 0.25        | -0.518                             | No           |
| A73R/G77R       | <a href="#">1qtx</a> | B            | R12       | R16       | 0.3         | -0.485                             | No           |
| K85Q/D89R       | <a href="#">2x1c</a> | B            | Q196      | R200      | 0.23        | -0.452                             | No           |
| D70K/G77K       | <a href="#">3ly3</a> | A            | K277      | K284      | 0.45        | -0.433                             | No           |
| S44K/K48N       | <a href="#">3lk4</a> | W            | K237      | N241      | 0.25        | -0.432                             | No           |
| D127Q/V131Y     | <a href="#">1c27</a> | A            | Q130      | Y134      | 0.28        | -0.431                             | No           |
| K43Q/D47R       | <a href="#">2x1c</a> | B            | Q196      | R200      | 0.22        | -0.418                             | No           |
| K147E/T151Y     | <a href="#">3ub9</a> | A            | E48       | Y52       | 0.23        | -0.415                             | No           |
| K43Q/D47Y       | <a href="#">1c27</a> | A            | Q130      | Y134      | 0.2         | -0.415                             | No           |
| D127H/V131Y     | <a href="#">1xh8</a> | A            | H142      | Y146      | 0.19        | -0.41                              | No           |
| N40R/S44W       | <a href="#">1w35</a> | A            | R163      | W167      | 0.32        | -0.41                              | No           |
| D127E/V131Y     | <a href="#">3ub9</a> | A            | E48       | Y52       | 0.16        | -0.358                             | No           |
| K85R/D89N       | <a href="#">3ix8</a> | A            | R137      | N141      | 0.46        | -0.312                             | No           |
| D127H/V131W     | <a href="#">4enq</a> | D            | H251      | W255      | 0.2         | -0.308                             | No           |
| T109E/G113Y     | <a href="#">3ub9</a> | A            | E48       | Y52       | 0.47        | -0.293                             | No           |
| P86Q/S90H       | <a href="#">2gj3</a> | A            | Q29       | H33       | 0.39        | -0.291                             | No           |
| A73S/G77K       | <a href="#">4kn8</a> | B            | S26       | K30       | 0.17        | -0.246                             | No           |
| K147H/T151W     | <a href="#">4enq</a> | D            | H251      | W255      | 0.4         | -0.24                              | No           |
| S44Q/K48Y       | <a href="#">1c27</a> | A            | Q130      | Y134      | 0.21        | -0.201                             | No           |
| N40R/S44N       | <a href="#">3ix8</a> | A            | R137      | N141      | 0.47        | -0.164                             | No           |
| K147H/T151Y     | <a href="#">1xh8</a> | A            | H142      | Y146      | 0.4         | -0.163                             | No           |

| <b>Mutation</b> | <b>Template</b>      | <b>Chain</b> | <b>R1</b> | <b>R2</b> | <b>RMSD</b> | <b><math>\Delta\Delta G</math></b> | <b>Clash</b> |
|-----------------|----------------------|--------------|-----------|-----------|-------------|------------------------------------|--------------|
| A41Q/E45R       | <a href="#">2x1c</a> | B            | Q196      | R200      | 0.2         | -0.158                             | No           |
| K147D/T151W     | <a href="#">4ggo</a> | A            | D205      | W209      | 0.19        | -0.147                             | No           |
| D72K/L79K       | <a href="#">3ly3</a> | A            | K277      | K284      | 0.47        | -0.115                             | No           |
| T109D/G113W     | <a href="#">4ggo</a> | A            | D205      | W209      | 0.47        | -0.074                             | No           |
| K85N/D89E       | <a href="#">4dno</a> | B            | N233      | E237      | 0.45        | -0.026                             | No           |
| T115K/R119H     | <a href="#">2ifq</a> | A            | K39       | H43       | 0.4         | -0.01                              | No           |
| D127T/V131H     | <a href="#">3vpc</a> | C            | T148      | H152      | 0.2         | 0.0                                | No           |
| T115R/R119N     | <a href="#">3ix8</a> | A            | R137      | N141      | 0.45        | 0.035                              | No           |
| N68K/V75K       | <a href="#">3ly3</a> | A            | K277      | K284      | 0.42        | 0.041                              | No           |
| T109W/G113W     | <a href="#">4tf4</a> | A            | W287      | W291      | 0.48        | 0.083                              | No           |
| P143T/K147S     | <a href="#">3hh1</a> | C            | T43       | S47       | 0.21        | 0.114                              | No           |
| P143R/K147N     | <a href="#">3ix8</a> | A            | R137      | N141      | 0.49        | 0.162                              | No           |
| K65Q/Q69Y       | <a href="#">1c27</a> | A            | Q130      | Y134      | 0.22        | 0.233                              | No           |
| K60E/E64Y       | <a href="#">3ub9</a> | A            | E48       | Y52       | 0.47        | 0.259                              | No           |
| A73S/G77H       | <a href="#">4toh</a> | B            | S126      | H130      | 0.27        | 0.28                               | No           |
| D127N/V131T     | <a href="#">3bol</a> | B            | N190      | T194      | 0.39        | 0.298                              | No           |
| K19T/G23D       | <a href="#">5df7</a> | B            | T168      | D172      | 0.42        | 0.307                              | No           |
| D72R/R76N       | <a href="#">3ix8</a> | A            | R137      | N141      | 0.5         | 0.314                              | No           |
| E5S/I9K         | <a href="#">4kn8</a> | B            | S26       | K30       | 0.3         | 0.321                              | No           |
| L39R/K43R       | <a href="#">1qtx</a> | B            | R12       | R16       | 0.47        | 0.335                              | No           |
| D127S/V131H     | <a href="#">4toh</a> | B            | S126      | H130      | 0.27        | 0.37                               | No           |
| T115S/R119D     | <a href="#">4iqg</a> | B            | S37       | D41       | 0.27        | 0.4                                | No           |

| Mutation    | Template             | Chain | R1   | R2   | RMSD | $\Delta\Delta G$ | Clash |
|-------------|----------------------|-------|------|------|------|------------------|-------|
| D61N/K65T   | <a href="#">3bol</a> | B     | N190 | T194 | 0.42 | 0.406            | No    |
| A73H/G77Y   | <a href="#">1xb8</a> | A     | H142 | Y146 | 0.43 | 0.428            | No    |
| K85N/D89T   | <a href="#">3bol</a> | B     | N190 | T194 | 0.35 | 0.428            | No    |
| T109H/G113S | <a href="#">1p7g</a> | H     | H87  | S91  | 0.44 | 0.45             | No    |
| K65E/Q69Y   | <a href="#">3ub9</a> | A     | E48  | Y52  | 0.15 | 0.5              | No    |
| A41R/E45H   | <a href="#">4xv8</a> | A     | R48  | H52  | 0.21 | 0.506            | No    |
| K65D/Q69W   | <a href="#">4ggo</a> | A     | D205 | W209 | 0.23 | 0.544            | No    |
| D72N/R76T   | <a href="#">3bol</a> | B     | N190 | T194 | 0.33 | 0.647            | No    |
| K85H/D89N   | <a href="#">4hmm</a> | B     | H177 | N181 | 0.29 | 0.647            | No    |
| S44H/K48W   | <a href="#">4enq</a> | D     | H251 | W255 | 0.28 | 0.685            | No    |
| K85N/D89Y   | <a href="#">3v1w</a> | B     | N375 | Y379 | 0.3  | 0.711            | No    |
| N116Q/M120R | <a href="#">2x1c</a> | B     | Q196 | R200 | 0.22 | 0.719            | No    |
| A41D/E45W   | <a href="#">4ggo</a> | A     | D205 | W209 | 0.17 | 0.768            | No    |
| T151N/T155H | <a href="#">3drz</a> | B     | N104 | H108 | 0.45 | 0.774            | No    |
| A41H/E45W   | <a href="#">4enq</a> | D     | H251 | W255 | 0.32 | 0.786            | No    |
| E45Q/A49H   | <a href="#">2gj3</a> | A     | Q29  | H33  | 0.41 | 0.826            | No    |
| K65N/Q69Y   | <a href="#">3v1w</a> | B     | N375 | Y379 | 0.24 | 0.875            | No    |
| K85D/D89W   | <a href="#">4ggo</a> | A     | D205 | W209 | 0.27 | 0.876            | No    |
| D72R/R76W   | <a href="#">1w35</a> | A     | R163 | W167 | 0.32 | 0.91             | No    |
| K65H/Q69W   | <a href="#">4enq</a> | D     | H251 | W255 | 0.21 | 0.982            | No    |
| L39T/K43Q   | <a href="#">3c9x</a> | A     | T109 | Q113 | 0.41 | 0.984            | No    |
| D70Q/A74H   | <a href="#">2gj3</a> | A     | Q29  | H33  | 0.45 | 0.986            | No    |

| Mutation    | Template             | Chain | R1   | R2   | RMSD | $\Delta\Delta G$ | Clash |
|-------------|----------------------|-------|------|------|------|------------------|-------|
| K19Q/Y25W   | <a href="#">1g6i</a> | A     | Q311 | W318 | 0.41 | 1.007            | No    |
| K85H/D89W   | <a href="#">4enq</a> | D     | H251 | W255 | 0.43 | 1.011            | No    |
| K60R/E64N   | <a href="#">3ix8</a> | A     | R137 | N141 | 0.2  | 1.013            | No    |
| K65H/Q69Y   | <a href="#">1xh8</a> | A     | H142 | Y146 | 0.17 | 1.061            | No    |
| K60H/E64N   | <a href="#">4hmm</a> | B     | H177 | N181 | 0.48 | 1.066            | No    |
| K85H/D89S   | <a href="#">1p7g</a> | H     | H87  | S91  | 0.37 | 1.066            | No    |
| K43N/D47T   | <a href="#">3bol</a> | B     | N190 | T194 | 0.39 | 1.12             | No    |
| P143S/K147D | <a href="#">4iqg</a> | B     | S37  | D41  | 0.3  | 1.171            | No    |
| K65H/Q69N   | <a href="#">4hmm</a> | B     | H177 | N181 | 0.22 | 1.175            | No    |
| K65H/Q69K   | <a href="#">1k3t</a> | C     | H349 | K353 | 0.5  | 1.178            | No    |
| L39Q/K43R   | <a href="#">2x1c</a> | B     | Q196 | R200 | 0.46 | 1.191            | No    |
| K65H/Q69S   | <a href="#">1p7g</a> | H     | H87  | S91  | 0.44 | 1.199            | No    |
| L39R/K43W   | <a href="#">1w35</a> | A     | R163 | W167 | 0.49 | 1.204            | No    |
| K65N/Q69T   | <a href="#">3bol</a> | B     | N190 | T194 | 0.34 | 1.21             | No    |
| A41Q/E45Y   | <a href="#">1c27</a> | A     | Q130 | Y134 | 0.16 | 1.255            | No    |
| A73W/G77S   | <a href="#">2ejj</a> | C     | W146 | S150 | 0.15 | 1.295            | No    |
| A41Q/E45H   | <a href="#">2gj3</a> | A     | Q29  | H33  | 0.41 | 1.304            | No    |
| N116K/M120H | <a href="#">2ifq</a> | A     | K39  | H43  | 0.29 | 1.344            | No    |
| N116Y/M120T | <a href="#">4cae</a> | C     | Y88  | T92  | 0.29 | 1.357            | No    |
| N116H/M120S | <a href="#">1p7g</a> | H     | H87  | S91  | 0.38 | 1.395            | No    |
| A41H/E45Y   | <a href="#">1xh8</a> | A     | H142 | Y146 | 0.3  | 1.396            | No    |
| A41K/E45N   | <a href="#">3lk4</a> | W     | K237 | N241 | 0.29 | 1.424            | No    |



| <b>Mutation</b> | <b>Template</b>      | <b>Chain</b> | <b>R1</b> | <b>R2</b> | <b>RMSD</b> | <b><math>\Delta\Delta G</math></b> | <b>Clash</b> |
|-----------------|----------------------|--------------|-----------|-----------|-------------|------------------------------------|--------------|
| E45H/A49S       | <a href="#">1p7g</a> | H            | H87       | S91       | 0.39        | 1.444                              | No           |
| E5T/I9H         | <a href="#">3vpc</a> | C            | T148      | H152      | 0.26        | 1.465                              | No           |
| K147H/T151S     | <a href="#">1p7g</a> | H            | H87       | S91       | 0.34        | 1.503                              | No           |
| V75Q/L79R       | <a href="#">2x1c</a> | B            | Q196      | R200      | 0.34        | 1.516                              | No           |
| N116H/E128H     | <a href="#">5i14</a> | A            | H73       | H85       | 0.36        | 1.528                              | No           |
| K85D/D89N       | <a href="#">4nac</a> | B            | D65       | N69       | 0.44        | 1.53                               | No           |
| V75W/L79Y       | <a href="#">5std</a> | C            | W26       | Y30       | 0.38        | 1.532                              | No           |
| L39Q/K43Y       | <a href="#">1c27</a> | A            | Q130      | Y134      | 0.48        | 1.54                               | No           |
| A41S/E45Y       | <a href="#">3r3r</a> | A            | S159      | Y163      | 0.44        | 1.543                              | No           |
| V75E/L79Y       | <a href="#">3ub9</a> | A            | E48       | Y52       | 0.28        | 1.588                              | No           |
| N116H/M120N     | <a href="#">4hmm</a> | B            | H177      | N181      | 0.25        | 1.589                              | No           |
| E45N/A49E       | <a href="#">4dno</a> | B            | N233      | E237      | 0.48        | 1.595                              | No           |
| V75Q/L79Y       | <a href="#">1c27</a> | A            | Q130      | Y134      | 0.31        | 1.61                               | No           |
| A41S/E45H       | <a href="#">4toh</a> | B            | S126      | H130      | 0.16        | 1.615                              | No           |
| N116Q/M120Y     | <a href="#">1c27</a> | A            | Q130      | Y134      | 0.21        | 1.616                              | No           |
| E108T/A112S     | <a href="#">3hh1</a> | C            | T43       | S47       | 0.38        | 1.622                              | No           |
| N116H/M120Y     | <a href="#">1xh8</a> | A            | H142      | Y146      | 0.25        | 1.632                              | No           |
| F4N/R8T         | <a href="#">3bol</a> | B            | N190      | T194      | 0.43        | 1.634                              | No           |
| L39T/K43H       | <a href="#">3vpc</a> | C            | T148      | H152      | 0.45        | 1.647                              | No           |
| L39E/K43Y       | <a href="#">3ub9</a> | A            | E48       | Y52       | 0.43        | 1.653                              | No           |
| E128N/N132T     | <a href="#">3bol</a> | B            | N190      | T194      | 0.35        | 1.672                              | No           |
| Q69H/A73W       | <a href="#">4enq</a> | D            | H251      | W255      | 0.39        | 1.69                               | No           |

| Mutation    | Template             | Chain | R1   | R2   | RMSD | $\Delta\Delta G$ | Clash |
|-------------|----------------------|-------|------|------|------|------------------|-------|
| E5H/I9Y     | <a href="#">1xh8</a> | A     | H142 | Y146 | 0.26 | 1.697            | No    |
| K43H/D47N   | <a href="#">4hmm</a> | B     | H177 | N181 | 0.25 | 1.708            | No    |
| N116Y/M120Y | <a href="#">3i0z</a> | A     | Y292 | Y296 | 0.49 | 1.71             | No    |
| A41H/E45S   | <a href="#">1p7g</a> | H     | H87  | S91  | 0.4  | 1.712            | No    |
| Q69H/A73Y   | <a href="#">1xh8</a> | A     | H142 | Y146 | 0.37 | 1.735            | No    |
| N116R/M120N | <a href="#">3ix8</a> | A     | R137 | N141 | 0.45 | 1.736            | No    |
| L39T/K43R   | <a href="#">3mux</a> | A     | T233 | R237 | 0.23 | 1.742            | No    |
| E5N/I9Y     | <a href="#">3v1w</a> | B     | N375 | Y379 | 0.22 | 1.776            | No    |
| M120E/N132R | <a href="#">2jjb</a> | C     | E345 | R371 | 0.29 | 1.801            | No    |
| L39K/K43N   | <a href="#">3lk4</a> | W     | K237 | N241 | 0.49 | 1.838            | No    |
| L39T/K43S   | <a href="#">3hh1</a> | C     | T43  | S47  | 0.39 | 1.878            | No    |
| L39W/K43S   | <a href="#">2ejj</a> | C     | W146 | S150 | 0.46 | 1.932            | No    |
| D20S/Y24Q   | <a href="#">3lum</a> | C     | S181 | Q185 | 0.35 | 1.955            | No    |
| L39H/K43N   | <a href="#">4hmm</a> | B     | H177 | N181 | 0.44 | 1.976            | No    |
| A73H/G77S   | <a href="#">1p7g</a> | H     | H87  | S91  | 0.38 | 1.981            | No    |
| D70K/A74N   | <a href="#">3lk4</a> | W     | K237 | N241 | 0.37 | 2.02             | No    |
| L39Y/K43T   | <a href="#">4cae</a> | C     | Y88  | T92  | 0.46 | 2.03             | No    |
| V75N/L79Y   | <a href="#">3v1w</a> | B     | N375 | Y379 | 0.32 | 2.081            | No    |
| V75N/L79T   | <a href="#">3bol</a> | B     | N190 | T194 | 0.37 | 2.091            | No    |
| E108S/A112D | <a href="#">4iqg</a> | B     | S37  | D41  | 0.38 | 2.143            | No    |
| Q69N/A73T   | <a href="#">3bol</a> | B     | N190 | T194 | 0.37 | 2.157            | No    |
| L39R/K43H   | <a href="#">4xv8</a> | A     | R48  | H52  | 0.46 | 2.182            | No    |

| <b>Mutation</b> | <b>Template</b>      | <b>Chain</b> | <b>R1</b> | <b>R2</b> | <b>RMSD</b> | <b><math>\Delta\Delta G</math></b> | <b>Clash</b> |
|-----------------|----------------------|--------------|-----------|-----------|-------------|------------------------------------|--------------|
| N116S/M120Y     | <a href="#">3r3r</a> | A            | S159      | Y163      | 0.5         | 2.184                              | No           |
| V71T/V75R       | <a href="#">3mux</a> | A            | T233      | R237      | 0.5         | 2.188                              | No           |
| F67Q/V71Y       | <a href="#">1c27</a> | A            | Q130      | Y134      | 0.27        | 2.195                              | No           |
| L66N/D70E       | <a href="#">4dno</a> | B            | N233      | E237      | 0.33        | 2.237                              | No           |
| W126T/A130S     | <a href="#">3hh1</a> | C            | T43       | S47       | 0.2         | 2.237                              | No           |
| V75K/L79H       | <a href="#">2ifq</a> | A            | K39       | H43       | 0.4         | 2.246                              | No           |
| N116S/M120H     | <a href="#">4toh</a> | B            | S126      | H130      | 0.19        | 2.279                              | No           |
| E5S/I9H         | <a href="#">4toh</a> | B            | S126      | H130      | 0.29        | 2.283                              | No           |
| L39S/K43H       | <a href="#">4toh</a> | B            | S126      | H130      | 0.48        | 2.29                               | No           |
| E45D/A49N       | <a href="#">4nac</a> | B            | D65       | N69       | 0.46        | 2.3                                | No           |
| M120T/N132Q     | <a href="#">2f7n</a> | A            | T72       | Q112      | 0.29        | 2.308                              | No           |
| M102E/M106E     | <a href="#">3we5</a> | B            | E15       | E19       | 0.21        | 2.311                              | No           |
| V149N/F153Y     | <a href="#">3v1w</a> | B            | N375      | Y379      | 0.24        | 2.319                              | No           |
| F67E/V71Y       | <a href="#">3ub9</a> | A            | E48       | Y52       | 0.2         | 2.34                               | No           |
| M102K/M106E     | <a href="#">3g9k</a> | D            | K212      | E216      | 0.26        | 2.347                              | No           |
| L39R/K43N       | <a href="#">3ix8</a> | A            | R137      | N141      | 0.25        | 2.354                              | No           |
| C97T/N101H      | <a href="#">3vpc</a> | C            | T148      | H152      | 0.21        | 2.359                              | No           |
| V75S/L79K       | <a href="#">4kn8</a> | B            | S26       | K30       | 0.32        | 2.383                              | No           |
| V75W/L79T       | <a href="#">1c5v</a> | A            | W237      | T241      | 0.46        | 2.385                              | No           |
| V75K/L79N       | <a href="#">3lk4</a> | W            | K237      | N241      | 0.14        | 2.411                              | No           |
| N116S/M120K     | <a href="#">4kn8</a> | B            | S26       | K30       | 0.22        | 2.416                              | No           |
| V71K/V75H       | <a href="#">2ifq</a> | A            | K39       | H43       | 0.29        | 2.483                              | No           |

| Mutation    | Template             | Chain | R1   | R2   | RMSD | $\Delta\Delta G$ | Clash |
|-------------|----------------------|-------|------|------|------|------------------|-------|
| V75Y/L79T   | <a href="#">4cae</a> | C     | Y88  | T92  | 0.3  | 2.489            | No    |
| V75H/L79Y   | <a href="#">1xh8</a> | A     | H142 | Y146 | 0.32 | 2.547            | No    |
| L91E/R95Q   | <a href="#">2f57</a> | B     | E646 | Q650 | 0.46 | 2.56             | No    |
| M106R/V111T | <a href="#">1vmg</a> | A     | R23  | T28  | 0.39 | 2.572            | No    |
| L39S/K43D   | <a href="#">4iqg</a> | B     | S37  | D41  | 0.34 | 2.582            | No    |
| L39K/K43H   | <a href="#">2ifq</a> | A     | K39  | H43  | 0.39 | 2.599            | No    |
| V71W/V75Y   | <a href="#">5std</a> | C     | W26  | Y30  | 0.25 | 2.613            | No    |
| R145H/V149N | <a href="#">4hmm</a> | B     | H177 | N181 | 0.28 | 2.627            | No    |
| V75S/L79H   | <a href="#">4toh</a> | B     | S126 | H130 | 0.31 | 2.631            | No    |
| V71K/I78R   | <a href="#">4r0y</a> | A     | K827 | R834 | 0.5  | 2.64             | No    |
| V149Q/F153R | <a href="#">2x1c</a> | B     | Q196 | R200 | 0.26 | 2.641            | No    |
| V71Y/V75T   | <a href="#">4cae</a> | C     | Y88  | T92  | 0.27 | 2.646            | No    |
| V75W/L79S   | <a href="#">2ejj</a> | C     | W146 | S150 | 0.32 | 2.652            | No    |
| V71N/V75T   | <a href="#">3bol</a> | B     | N190 | T194 | 0.34 | 2.671            | No    |
| R145S/V149Y | <a href="#">3r3r</a> | A     | S159 | Y163 | 0.49 | 2.684            | No    |
| F67H/V71N   | <a href="#">4hmm</a> | B     | H177 | N181 | 0.2  | 2.69             | No    |
| V149D/F153W | <a href="#">4ggo</a> | A     | D205 | W209 | 0.21 | 2.711            | No    |
| A41N/E45T   | <a href="#">3bol</a> | B     | N190 | T194 | 0.4  | 2.717            | No    |
| V75H/L79S   | <a href="#">1p7g</a> | H     | H87  | S91  | 0.39 | 2.74             | No    |
| F114R/L118S | <a href="#">3sxy</a> | B     | R166 | S170 | 0.43 | 2.754            | No    |
| R145H/V149S | <a href="#">1p7g</a> | H     | H87  | S91  | 0.45 | 2.772            | No    |
| I3T/L7Q     | <a href="#">3c9x</a> | A     | T109 | Q113 | 0.42 | 2.774            | No    |

| <b>Mutation</b> | <b>Template</b>      | <b>Chain</b> | <b>R1</b> | <b>R2</b> | <b>RMSD</b> | <b><math>\Delta\Delta G</math></b> | <b>Clash</b> |
|-----------------|----------------------|--------------|-----------|-----------|-------------|------------------------------------|--------------|
| F114S/L118H     | <a href="#">4o4t</a> | A            | S19       | H23       | 0.45        | 2.788                              | No           |
| V71H/V75N       | <a href="#">4hmm</a> | B            | H177      | N181      | 0.23        | 2.799                              | No           |
| R145N/V149T     | <a href="#">3bol</a> | B            | N190      | T194      | 0.35        | 2.803                              | No           |
| V75H/L79N       | <a href="#">4hmm</a> | B            | H177      | N181      | 0.36        | 2.824                              | No           |
| S117W/L121T     | <a href="#">1c5v</a> | A            | W237      | T241      | 0.33        | 2.846                              | No           |
| I100H/F104N     | <a href="#">4hmm</a> | B            | H177      | N181      | 0.24        | 2.874                              | No           |
| I100Y/F104T     | <a href="#">4cae</a> | C            | Y88       | T92       | 0.21        | 2.88                               | No           |
| F67K/V71N       | <a href="#">3lk4</a> | W            | K237      | N241      | 0.34        | 2.907                              | No           |
| M6N/D10T        | <a href="#">3bol</a> | B            | N190      | T194      | 0.32        | 2.93                               | No           |
| V71S/V75K       | <a href="#">4kn8</a> | B            | S26       | K30       | 0.24        | 2.947                              | No           |
| S117N/L121E     | <a href="#">4dno</a> | B            | N233      | E237      | 0.39        | 2.971                              | No           |
| M102E/V149T     | <a href="#">2y81</a> | A            | E129      | T232      | 0.49        | 2.975                              | No           |
| D70S/A74D       | <a href="#">4iqg</a> | B            | S37       | D41       | 0.47        | 3.019                              | No           |
| I150N/R154T     | <a href="#">3bol</a> | B            | N190      | T194      | 0.26        | 3.019                              | No           |
| A74T/I78R       | <a href="#">3mux</a> | A            | T233      | R237      | 0.48        | 3.026                              | No           |
| V71H/V75S       | <a href="#">1p7g</a> | H            | H87       | S91       | 0.41        | 3.039                              | No           |
| I100N/F104T     | <a href="#">3bol</a> | B            | N190      | T194      | 0.37        | 3.062                              | No           |
| S117Y/L121T     | <a href="#">4cae</a> | C            | Y88       | T92       | 0.26        | 3.084                              | No           |
| F67N/V71E       | <a href="#">4dno</a> | B            | N233      | E237      | 0.47        | 3.085                              | No           |
| R96T/I100H      | <a href="#">3vpc</a> | C            | T148      | H152      | 0.2         | 3.09                               | No           |
| F67K/V71H       | <a href="#">2ifq</a> | A            | K39       | H43       | 0.26        | 3.092                              | No           |
| F67N/V71T       | <a href="#">3bol</a> | B            | N190      | T194      | 0.31        | 3.092                              | No           |

| <b>Mutation</b> | <b>Template</b>      | <b>Chain</b> | <b>R1</b> | <b>R2</b> | <b>RMSD</b> | <b><math>\Delta\Delta G</math></b> | <b>Clash</b> |
|-----------------|----------------------|--------------|-----------|-----------|-------------|------------------------------------|--------------|
| I100S/F104K     | <a href="#">4kn8</a> | B            | S26       | K30       | 0.18        | 3.114                              | No           |
| I3H/L7N         | <a href="#">4hmm</a> | B            | H177      | N181      | 0.47        | 3.124                              | No           |
| V149Y/F153T     | <a href="#">4cae</a> | C            | Y88       | T92       | 0.32        | 3.125                              | No           |
| V71W/V75T       | <a href="#">1c5v</a> | A            | W237      | T241      | 0.36        | 3.164                              | No           |
| E62N/L66T       | <a href="#">3bol</a> | B            | N190      | T194      | 0.41        | 3.205                              | No           |
| I100S/F104D     | <a href="#">4iqg</a> | B            | S37       | D41       | 0.48        | 3.225                              | No           |
| V149N/F153T     | <a href="#">3bol</a> | B            | N190      | T194      | 0.39        | 3.249                              | No           |
| A63N/F67E       | <a href="#">4dno</a> | B            | N233      | E237      | 0.4         | 3.265                              | No           |
| V149H/F153N     | <a href="#">4hmm</a> | B            | H177      | N181      | 0.3         | 3.273                              | No           |
| R96N/I100T      | <a href="#">3bol</a> | B            | N190      | T194      | 0.46        | 3.285                              | No           |
| R96S/I100H      | <a href="#">4toh</a> | B            | S126      | H130      | 0.18        | 3.288                              | No           |
| L118N/L133R     | <a href="#">3g8d</a> | B            | N90       | R111      | 0.33        | 3.321                              | No           |
| L7N/E11H        | <a href="#">3drz</a> | B            | N104      | H108      | 0.46        | 3.323                              | No           |
| M102N/M106H     | <a href="#">3drz</a> | B            | N104      | H108      | 0.45        | 3.346                              | No           |
| I3S/L7K         | <a href="#">4kn8</a> | B            | S26       | K30       | 0.49        | 3.368                              | No           |
| I100H/F104S     | <a href="#">1p7g</a> | H            | H87       | S91       | 0.39        | 3.427                              | No           |
| L99E/V103Y      | <a href="#">3ub9</a> | A            | E48       | Y52       | 0.16        | 3.449                              | No           |
| F67H/V71S       | <a href="#">1p7g</a> | H            | H87       | S91       | 0.43        | 3.46                               | No           |
| I100S/F104H     | <a href="#">4toh</a> | B            | S126      | H130      | 0.18        | 3.46                               | No           |
| L99K/V103H      | <a href="#">2ifq</a> | A            | K39       | H43       | 0.31        | 3.495                              | No           |
| L99K/V103N      | <a href="#">3lk4</a> | W            | K237      | N241      | 0.29        | 3.504                              | No           |
| V149S/F153H     | <a href="#">4toh</a> | B            | S126      | H130      | 0.16        | 3.523                              | No           |

| Mutation    | Template             | Chain | R1   | R2   | RMSD | $\Delta\Delta G$ | Clash |
|-------------|----------------------|-------|------|------|------|------------------|-------|
| V149S/F153K | <a href="#">4kn8</a> | B     | S26  | K30  | 0.26 | 3.526            | No    |
| V71S/V75H   | <a href="#">4toh</a> | B     | S126 | H130 | 0.25 | 3.542            | No    |
| A146S/I150Y | <a href="#">3r3r</a> | A     | S159 | Y163 | 0.42 | 3.556            | No    |
| S117H/L121S | <a href="#">1p7g</a> | H     | H87  | S91  | 0.38 | 3.571            | No    |
| F67D/V71N   | <a href="#">4nac</a> | B     | D65  | N69  | 0.46 | 3.589            | No    |
| A129Y/L133T | <a href="#">4cae</a> | C     | Y88  | T92  | 0.22 | 3.623            | No    |
| I3T/L7S     | <a href="#">3hh1</a> | C     | T43  | S47  | 0.42 | 3.648            | No    |
| A129T/L133H | <a href="#">3vpc</a> | C     | T148 | H152 | 0.25 | 3.659            | No    |
| V149H/F153S | <a href="#">1p7g</a> | H     | H87  | S91  | 0.43 | 3.689            | No    |
| A98S/M102H  | <a href="#">4toh</a> | B     | S126 | H130 | 0.19 | 3.713            | No    |
| L121D/L133E | <a href="#">2pqr</a> | B     | D101 | E121 | 0.46 | 3.724            | No    |
| L121Q/L133E | <a href="#">3bve</a> | B     | Q88  | E142 | 0.48 | 3.733            | No    |
| L99H/V103N  | <a href="#">4hmm</a> | B     | H177 | N181 | 0.27 | 3.735            | No    |
| L99N/V103T  | <a href="#">3bol</a> | B     | N190 | T194 | 0.4  | 3.735            | No    |
| F67S/V71D   | <a href="#">4iqg</a> | B     | S37  | D41  | 0.47 | 3.748            | No    |
| A42N/L46T   | <a href="#">3bol</a> | B     | N190 | T194 | 0.39 | 3.781            | No    |
| R95T/L99H   | <a href="#">3vpc</a> | C     | T148 | H152 | 0.31 | 3.804            | No    |
| A74S/I78H   | <a href="#">4toh</a> | B     | S126 | H130 | 0.29 | 3.805            | No    |
| A129S/L133K | <a href="#">4kn8</a> | B     | S26  | K30  | 0.21 | 3.81             | No    |
| I3S/L7D     | <a href="#">4iqg</a> | B     | S37  | D41  | 0.45 | 3.823            | No    |
| L99N/V103E  | <a href="#">4dno</a> | B     | N233 | E237 | 0.41 | 3.837            | No    |
| A129S/L133H | <a href="#">4toh</a> | B     | S126 | H130 | 0.33 | 3.845            | No    |

| <b>Mutation</b> | <b>Template</b>      | <b>Chain</b> | <b>R1</b> | <b>R2</b> | <b>RMSD</b> | <b><math>\Delta\Delta G</math></b> | <b>Clash</b> |
|-----------------|----------------------|--------------|-----------|-----------|-------------|------------------------------------|--------------|
| V87E/L121N      | <a href="#">4ev8</a> | A            | E571      | N609      | 0.46        | 3.851                              | No           |
| A146D/I150N     | <a href="#">4nac</a> | B            | D65       | N69       | 0.41        | 3.897                              | No           |
| A146S/I150K     | <a href="#">4kn8</a> | B            | S26       | K30       | 0.16        | 4.019                              | No           |
| L99S/V103K      | <a href="#">4kn8</a> | B            | S26       | K30       | 0.22        | 4.022                              | No           |
| L99H/V103S      | <a href="#">1p7g</a> | H            | H87       | S91       | 0.43        | 4.024                              | No           |
| A146S/I150H     | <a href="#">4toh</a> | B            | S126      | H130      | 0.27        | 4.029                              | No           |
| L99S/V103H      | <a href="#">4toh</a> | B            | S126      | H130      | 0.16        | 4.043                              | No           |
| L121S/L133Y     | <a href="#">2h88</a> | A            | S497      | Y537      | 0.31        | 4.102                              | No           |
| L99S/V103Y      | <a href="#">3r3r</a> | A            | S159      | Y163      | 0.4         | 4.109                              | No           |
| A129S/L133D     | <a href="#">4iqg</a> | B            | S37       | D41       | 0.46        | 4.225                              | No           |

Showing 1 to 272 of 272 entries



**Table S7. The total number of contacts for the wild protein and their 50 mutants of the immunoglobulin (2YWY).**

Proteus ID: UM6SQD. Available at <<http://proteus.dcc.ufmg.br/result/id/UM6SQD>>. The values represent the total atom pairs from different residues that attend to the cutoff patterns. Contacts were calculated using Arpeggio script tool (Jubb et al., 2017). P-value was calculated using T-Test function (parameters: paired and single tailed) from MS Excel software.

Definitions – wt: wild type; mt: mutant; hb: Hydrogen bond; whb: Weak hydrogen bond; i: Ionic interaction; a: Aromatic interaction; po: Polar interaction; wp: Weak polar interaction; hy: Hydrophobic interaction. \*Each line represents a mutant compared to the unique wild type.

| #         | Wt* |     |    |     |     |     |     | mt  |     |    |     |     |     |     |
|-----------|-----|-----|----|-----|-----|-----|-----|-----|-----|----|-----|-----|-----|-----|
| Type      | hb  | whb | i  | a   | po  | wp  | hy  | hb  | whb | i  | a   | po  | wp  | hy  |
| Contacts* | 166 | 120 | 14 | 3   | 194 | 148 | 148 | 167 | 126 | 14 | 8   | 197 | 147 | 142 |
|           | 166 | 120 | 14 | 3   | 194 | 148 | 148 | 166 | 122 | 14 | 0   | 195 | 149 | 139 |
|           | 166 | 120 | 14 | 3   | 194 | 148 | 148 | 165 | 125 | 14 | 0   | 193 | 150 | 142 |
|           | 166 | 120 | 14 | 3   | 194 | 148 | 148 | 166 | 122 | 14 | 3   | 195 | 157 | 141 |
|           | 166 | 120 | 14 | 3   | 194 | 148 | 148 | 168 | 123 | 14 | 3   | 199 | 153 | 138 |
|           | 166 | 120 | 14 | 3   | 194 | 148 | 148 | 167 | 121 | 14 | 3   | 199 | 153 | 146 |
|           | 166 | 120 | 14 | 3   | 194 | 148 | 148 | 168 | 117 | 14 | 3   | 197 | 150 | 144 |
|           | 166 | 120 | 14 | 3   | 194 | 148 | 148 | 166 | 120 | 14 | 3   | 194 | 153 | 145 |
|           | 166 | 120 | 14 | 3   | 194 | 148 | 148 | 168 | 122 | 14 | 3   | 197 | 151 | 140 |
|           | 166 | 120 | 14 | 3   | 194 | 148 | 148 | 167 | 118 | 14 | 10  | 197 | 154 | 150 |
|           | 166 | 120 | 14 | 3   | 194 | 148 | 148 | 166 | 125 | 14 | 3   | 196 | 160 | 147 |
|           | 166 | 120 | 14 | 3   | 194 | 148 | 148 | 166 | 124 | 14 | 3   | 199 | 158 | 142 |
|           | 166 | 120 | 14 | 3   | 194 | 148 | 148 | 171 | 119 | 14 | 3   | 201 | 153 | 145 |
|           | 166 | 120 | 14 | 3   | 194 | 148 | 148 | 168 | 121 | 14 | 3   | 200 | 153 | 147 |
|           | 166 | 120 | 14 | 3   | 194 | 148 | 148 | 167 | 117 | 14 | 3   | 198 | 153 | 145 |
|           | 166 | 120 | 14 | 3   | 194 | 148 | 148 | 167 | 115 | 14 | 3   | 197 | 155 | 148 |
|           | 166 | 120 | 14 | 3   | 194 | 148 | 148 | 166 | 117 | 14 | 10  | 199 | 153 | 144 |
|           | 166 | 120 | 14 | 3   | 194 | 148 | 148 | 168 | 116 | 14 | 3   | 200 | 151 | 146 |
|           | 166 | 120 | 14 | 3   | 194 | 148 | 148 | 164 | 118 | 14 | 12  | 197 | 161 | 140 |
|           | 166 | 120 | 14 | 3   | 194 | 148 | 148 | 166 | 120 | 14 | 3   | 198 | 157 | 146 |
|           | 166 | 120 | 14 | 3   | 194 | 148 | 148 | 168 | 120 | 14 | 3   | 198 | 157 | 150 |
|           | 166 | 120 | 14 | 3   | 194 | 148 | 148 | 169 | 121 | 14 | 3   | 201 | 157 | 146 |
|           | 166 | 120 | 14 | 3   | 194 | 148 | 148 | 168 | 119 | 14 | 3   | 200 | 158 | 146 |
|           | 166 | 120 | 14 | 3   | 194 | 148 | 148 | 170 | 125 | 14 | 3   | 200 | 154 | 148 |
|           | 166 | 120 | 14 | 3   | 194 | 148 | 148 | 170 | 122 | 14 | 3   | 200 | 150 | 150 |
|           | 166 | 120 | 14 | 3   | 194 | 148 | 148 | 166 | 122 | 14 | 3   | 196 | 155 | 150 |
|           | 166 | 120 | 14 | 3   | 194 | 148 | 148 | 168 | 122 | 14 | 3   | 198 | 152 | 146 |
|           | 166 | 120 | 14 | 3   | 194 | 148 | 148 | 166 | 122 | 14 | 3   | 198 | 154 | 146 |
|           | 166 | 120 | 14 | 3   | 194 | 148 | 148 | 167 | 121 | 14 | 3   | 195 | 153 | 152 |
|           | 166 | 120 | 14 | 3   | 194 | 148 | 148 | 168 | 123 | 14 | 3   | 196 | 157 | 147 |
| 166       | 120 | 14  | 3  | 194 | 148 | 148 | 166 | 118 | 14  | 3  | 198 | 155 | 152 |     |
| 166       | 120 | 14  | 3  | 194 | 148 | 148 | 166 | 120 | 14  | 3  | 196 | 154 | 148 |     |
| 166       | 120 | 14  | 3  | 194 | 148 | 148 | 166 | 118 | 14  | 3  | 196 | 153 | 148 |     |

|                |     |    |   |     |     |     |          |        |        |        |        |        |        |
|----------------|-----|----|---|-----|-----|-----|----------|--------|--------|--------|--------|--------|--------|
| 166            | 120 | 14 | 3 | 194 | 148 | 148 | 168      | 118    | 14     | 3      | 197    | 152    | 148    |
| 166            | 120 | 14 | 3 | 194 | 148 | 148 | 166      | 120    | 14     | 17     | 196    | 153    | 150    |
| 166            | 120 | 14 | 3 | 194 | 148 | 148 | 170      | 118    | 14     | 3      | 198    | 153    | 146    |
| 166            | 120 | 14 | 3 | 194 | 148 | 148 | 168      | 118    | 14     | 3      | 199    | 156    | 136    |
| 166            | 120 | 14 | 3 | 194 | 148 | 148 | 169      | 123    | 19     | 3      | 199    | 154    | 148    |
| 166            | 120 | 14 | 3 | 194 | 148 | 148 | 170      | 125    | 14     | 3      | 199    | 158    | 150    |
| 166            | 120 | 14 | 3 | 194 | 148 | 148 | 169      | 127    | 14     | 0      | 198    | 155    | 139    |
| 166            | 120 | 14 | 3 | 194 | 148 | 148 | 169      | 124    | 14     | 0      | 199    | 152    | 137    |
| 166            | 120 | 14 | 3 | 194 | 148 | 148 | 165      | 120    | 17     | 0      | 195    | 160    | 139    |
| 166            | 120 | 14 | 3 | 194 | 148 | 148 | 166      | 121    | 19     | 0      | 196    | 156    | 143    |
| 166            | 120 | 14 | 3 | 194 | 148 | 148 | 165      | 119    | 14     | 0      | 195    | 151    | 138    |
| 166            | 120 | 14 | 3 | 194 | 148 | 148 | 162      | 123    | 14     | 0      | 194    | 155    | 137    |
| 166            | 120 | 14 | 3 | 194 | 148 | 148 | 164      | 117    | 11     | 3      | 193    | 150    | 141    |
| 166            | 120 | 14 | 3 | 194 | 148 | 148 | 165      | 122    | 11     | 3      | 196    | 150    | 143    |
| 166            | 120 | 14 | 3 | 194 | 148 | 148 | 164      | 122    | 14     | 3      | 193    | 154    | 141    |
| 166            | 120 | 14 | 3 | 194 | 148 | 148 | 166      | 120    | 14     | 3      | 194    | 155    | 140    |
| 166            | 120 | 14 | 3 | 194 | 148 | 148 | 168      | 119    | 14     | 3      | 199    | 153    | 143    |
| <i>p-value</i> |     |    |   |     |     |     | 0,000200 | 0,0323 | 0,2152 | 0,2064 | 1,27E- | 3,26E- | 2,28E- |
|                |     |    |   |     |     |     | 489      | 47     | 87     | 38     | 14     | 19     | 07     |

**Table S8. The total number of contacts for the wild protein and their 61 mutants of the Protease (ILVB).**

Proteus ID: N7Q9RZ. Available at <<http://proteus.dcc.ufmg.br/result/id/N7Q9RZ>>. Contacts were calculated using Arpeggio script tool (Jubb et al., 2017). P-value was calculated using T-Test function (parameters: paired and single tailed) from MS Excel software.

Definitions – wt: wild type; mt: mutant; hb: Hydrogen bond; whb: Weak hydrogen bond; i: Ionic interaction; a: Aromatic interaction; po: Polar interaction; wp: Weak polar interaction; hy: Hydrophobic interaction. \*Each line represents a mutant compared to the unique wild type.

| Prot<br>ein | wt* |     |    |     |     |     |     | mt  |     |    |     |     |     |     |
|-------------|-----|-----|----|-----|-----|-----|-----|-----|-----|----|-----|-----|-----|-----|
|             | hb  | whb | i  | a   | po  | wp  | hy  | hb  | whb | i  | a   | po  | wp  | hy  |
| Contacts*   | 303 | 251 | 17 | 44  | 347 | 275 | 335 | 305 | 251 | 17 | 44  | 351 | 279 | 332 |
|             | 303 | 251 | 17 | 44  | 347 | 275 | 335 | 304 | 253 | 17 | 41  | 349 | 281 | 330 |
|             | 303 | 251 | 17 | 44  | 347 | 275 | 335 | 303 | 249 | 17 | 44  | 351 | 288 | 331 |
|             | 303 | 251 | 17 | 44  | 347 | 275 | 335 | 306 | 253 | 20 | 38  | 353 | 283 | 335 |
|             | 303 | 251 | 17 | 44  | 347 | 275 | 335 | 305 | 253 | 17 | 38  | 352 | 283 | 336 |
|             | 303 | 251 | 17 | 44  | 347 | 275 | 335 | 303 | 253 | 17 | 49  | 349 | 287 | 326 |
|             | 303 | 251 | 17 | 44  | 347 | 275 | 335 | 305 | 253 | 17 | 44  | 349 | 283 | 331 |
|             | 303 | 251 | 17 | 44  | 347 | 275 | 335 | 305 | 251 | 17 | 44  | 349 | 281 | 335 |
|             | 303 | 251 | 17 | 44  | 347 | 275 | 335 | 303 | 253 | 17 | 44  | 349 | 285 | 323 |
|             | 303 | 251 | 17 | 44  | 347 | 275 | 335 | 303 | 257 | 17 | 44  | 347 | 285 | 325 |
|             | 303 | 251 | 17 | 44  | 347 | 275 | 335 | 305 | 253 | 17 | 44  | 349 | 286 | 326 |
|             | 303 | 251 | 17 | 44  | 347 | 275 | 335 | 303 | 253 | 17 | 41  | 347 | 281 | 338 |
|             | 303 | 251 | 17 | 44  | 347 | 275 | 335 | 303 | 251 | 17 | 41  | 346 | 288 | 327 |
|             | 303 | 251 | 17 | 44  | 347 | 275 | 335 | 304 | 248 | 18 | 44  | 351 | 281 | 327 |
|             | 303 | 251 | 17 | 44  | 347 | 275 | 335 | 303 | 253 | 17 | 52  | 351 | 280 | 326 |
|             | 303 | 251 | 17 | 44  | 347 | 275 | 335 | 305 | 254 | 17 | 44  | 349 | 281 | 329 |
|             | 303 | 251 | 17 | 44  | 347 | 275 | 335 | 305 | 255 | 17 | 44  | 350 | 284 | 330 |
|             | 303 | 251 | 17 | 44  | 347 | 275 | 335 | 305 | 252 | 17 | 44  | 351 | 280 | 324 |
|             | 303 | 251 | 17 | 44  | 347 | 275 | 335 | 303 | 251 | 17 | 44  | 349 | 275 | 327 |
|             | 303 | 251 | 17 | 44  | 347 | 275 | 335 | 305 | 251 | 17 | 44  | 350 | 276 | 328 |
|             | 303 | 251 | 17 | 44  | 347 | 275 | 335 | 303 | 252 | 17 | 44  | 351 | 281 | 328 |
|             | 303 | 251 | 17 | 44  | 347 | 275 | 335 | 303 | 254 | 17 | 44  | 351 | 284 | 329 |
|             | 303 | 251 | 17 | 44  | 347 | 275 | 335 | 306 | 253 | 20 | 44  | 352 | 282 | 328 |
|             | 303 | 251 | 17 | 44  | 347 | 275 | 335 | 303 | 251 | 17 | 44  | 349 | 280 | 334 |
|             | 303 | 251 | 17 | 44  | 347 | 275 | 335 | 305 | 253 | 17 | 44  | 351 | 282 | 330 |
|             | 303 | 251 | 17 | 44  | 347 | 275 | 335 | 304 | 253 | 17 | 44  | 350 | 283 | 328 |
|             | 303 | 251 | 17 | 44  | 347 | 275 | 335 | 303 | 255 | 17 | 44  | 351 | 283 | 330 |
|             | 303 | 251 | 17 | 44  | 347 | 275 | 335 | 303 | 251 | 17 | 44  | 351 | 282 | 333 |
|             | 303 | 251 | 17 | 44  | 347 | 275 | 335 | 303 | 251 | 17 | 58  | 351 | 284 | 332 |
|             | 303 | 251 | 17 | 44  | 347 | 275 | 335 | 305 | 251 | 17 | 50  | 353 | 280 | 328 |
|             | 303 | 251 | 17 | 44  | 347 | 275 | 335 | 305 | 253 | 17 | 44  | 351 | 282 | 335 |
| 303         | 251 | 17  | 44 | 347 | 275 | 335 | 305 | 249 | 17  | 44 | 349 | 276 | 336 |     |

|                |     |    |    |     |     |     |        |       |       |       |      |      |      |
|----------------|-----|----|----|-----|-----|-----|--------|-------|-------|-------|------|------|------|
| 303            | 251 | 17 | 44 | 347 | 275 | 335 | 301    | 250   | 17    | 44    | 344  | 281  | 336  |
| 303            | 251 | 17 | 44 | 347 | 275 | 335 | 303    | 246   | 17    | 44    | 346  | 284  | 329  |
| 303            | 251 | 17 | 44 | 347 | 275 | 335 | 305    | 251   | 17    | 48    | 352  | 283  | 343  |
| 303            | 251 | 17 | 44 | 347 | 275 | 335 | 307    | 248   | 17    | 44    | 350  | 279  | 333  |
| 303            | 251 | 17 | 44 | 347 | 275 | 335 | 305    | 252   | 17    | 49    | 352  | 278  | 328  |
| 303            | 251 | 17 | 44 | 347 | 275 | 335 | 306    | 249   | 17    | 44    | 350  | 286  | 328  |
| 303            | 251 | 17 | 44 | 347 | 275 | 335 | 303    | 251   | 17    | 44    | 349  | 281  | 329  |
| 303            | 251 | 17 | 44 | 347 | 275 | 335 | 305    | 251   | 17    | 44    | 351  | 286  | 326  |
| 303            | 251 | 17 | 44 | 347 | 275 | 335 | 303    | 251   | 17    | 44    | 351  | 285  | 329  |
| 303            | 251 | 17 | 44 | 347 | 275 | 335 | 303    | 251   | 17    | 44    | 351  | 284  | 329  |
| 303            | 251 | 17 | 44 | 347 | 275 | 335 | 305    | 251   | 17    | 44    | 352  | 283  | 331  |
| 303            | 251 | 17 | 44 | 347 | 275 | 335 | 303    | 249   | 17    | 58    | 351  | 283  | 333  |
| 303            | 251 | 17 | 44 | 347 | 275 | 335 | 303    | 249   | 17    | 39    | 351  | 282  | 332  |
| 303            | 251 | 17 | 44 | 347 | 275 | 335 | 305    | 251   | 17    | 44    | 349  | 280  | 328  |
| 303            | 251 | 17 | 44 | 347 | 275 | 335 | 304    | 250   | 17    | 44    | 349  | 281  | 330  |
| 303            | 251 | 17 | 44 | 347 | 275 | 335 | 305    | 250   | 17    | 44    | 354  | 277  | 333  |
| 303            | 251 | 17 | 44 | 347 | 275 | 335 | 306    | 253   | 20    | 44    | 352  | 279  | 334  |
| 303            | 251 | 17 | 44 | 347 | 275 | 335 | 305    | 251   | 19    | 44    | 351  | 280  | 334  |
| 303            | 251 | 17 | 44 | 347 | 275 | 335 | 306    | 251   | 17    | 44    | 354  | 284  | 337  |
| 303            | 251 | 17 | 44 | 347 | 275 | 335 | 303    | 249   | 17    | 44    | 347  | 281  | 338  |
| 303            | 251 | 17 | 44 | 347 | 275 | 335 | 303    | 251   | 17    | 44    | 353  | 285  | 337  |
| 303            | 251 | 17 | 44 | 347 | 275 | 335 | 305    | 252   | 17    | 44    | 352  | 279  | 332  |
| 303            | 251 | 17 | 44 | 347 | 275 | 335 | 305    | 253   | 17    | 44    | 351  | 285  | 337  |
| 303            | 251 | 17 | 44 | 347 | 275 | 335 | 305    | 251   | 17    | 44    | 352  | 279  | 336  |
| 303            | 251 | 17 | 44 | 347 | 275 | 335 | 303    | 252   | 17    | 44    | 351  | 286  | 335  |
| 303            | 251 | 17 | 44 | 347 | 275 | 335 | 303    | 253   | 17    | 50    | 351  | 285  | 335  |
| 303            | 251 | 17 | 44 | 347 | 275 | 335 | 305    | 251   | 17    | 48    | 349  | 283  | 337  |
| 303            | 251 | 17 | 44 | 347 | 275 | 335 | 302    | 248   | 17    | 44    | 350  | 280  | 332  |
| 303            | 251 | 17 | 44 | 347 | 275 | 335 | 305    | 255   | 17    | 53    | 355  | 285  | 324  |
| <i>p-value</i> |     |    |    |     |     |     | 3,4006 | 0,020 | 0,016 | 0,043 | 1,15 | 1,08 | 8,41 |
|                |     |    |    |     |     |     | 9E-10  | 989   | 363   | 059   | E-19 | E-27 | E-10 |

**Table S9. The total number of contacts for the wild protein and their 213 mutants of the Protease (ILGY).**

Proteus ID: YTP3YC. Available at <<http://proteus.dcc.ufmg.br/result/id/YTP3YC>>. Contacts were calculated using Arpeggio script tool (Jubb et al., 2017). P-value was calculated using T-Test function (parameters: paired and single tailed) from MS Excel software.

Definitions – wt: wild type; mt: mutant; hb: Hydrogen bond; whb: Weak hydrogen bond; i: Ionic interaction; a: Aromatic interaction; po: Polar interaction; wp: Weak polar interaction; hy: Hydrophobic interaction. \*Each line represents a mutant compared to the unique wild type.

| Prot<br>ein | wt* |     |    |    |     |     |     | mt  |     |    |    |     |     |     |
|-------------|-----|-----|----|----|-----|-----|-----|-----|-----|----|----|-----|-----|-----|
|             | hb  | whb | i  | a  | po  | wp  | hy  | hb  | whb | i  | a  | po  | wp  | hy  |
| Contacts*   | 451 | 331 | 35 | 57 | 503 | 371 | 442 | 453 | 333 | 35 | 57 | 506 | 379 | 442 |
|             | 451 | 331 | 35 | 57 | 503 | 371 | 442 | 453 | 333 | 35 | 57 | 506 | 382 | 444 |
|             | 451 | 331 | 35 | 57 | 503 | 371 | 442 | 453 | 333 | 35 | 57 | 506 | 381 | 442 |
|             | 451 | 331 | 35 | 57 | 503 | 371 | 442 | 449 | 326 | 35 | 57 | 503 | 377 | 441 |
|             | 451 | 331 | 35 | 57 | 503 | 371 | 442 | 451 | 334 | 35 | 59 | 505 | 381 | 438 |
|             | 451 | 331 | 35 | 57 | 503 | 371 | 442 | 452 | 336 | 35 | 57 | 505 | 383 | 440 |
|             | 451 | 331 | 35 | 57 | 503 | 371 | 442 | 452 | 336 | 35 | 57 | 505 | 386 | 441 |
|             | 451 | 331 | 35 | 57 | 503 | 371 | 442 | 450 | 336 | 35 | 64 | 505 | 381 | 443 |
|             | 451 | 331 | 35 | 57 | 503 | 371 | 442 | 452 | 336 | 35 | 57 | 506 | 384 | 443 |
|             | 451 | 331 | 35 | 57 | 503 | 371 | 442 | 453 | 332 | 35 | 57 | 506 | 379 | 436 |
|             | 451 | 331 | 35 | 57 | 503 | 371 | 442 | 451 | 337 | 35 | 65 | 505 | 377 | 435 |
|             | 451 | 331 | 35 | 57 | 503 | 371 | 442 | 451 | 336 | 35 | 67 | 505 | 382 | 440 |
|             | 451 | 331 | 35 | 57 | 503 | 371 | 442 | 455 | 331 | 35 | 57 | 507 | 384 | 441 |
|             | 451 | 331 | 35 | 57 | 503 | 371 | 442 | 455 | 333 | 35 | 57 | 510 | 376 | 440 |
|             | 451 | 331 | 35 | 57 | 503 | 371 | 442 | 454 | 333 | 39 | 57 | 511 | 381 | 437 |
|             | 451 | 331 | 35 | 57 | 503 | 371 | 442 | 447 | 331 | 31 | 57 | 506 | 378 | 442 |
|             | 451 | 331 | 35 | 57 | 503 | 371 | 442 | 451 | 329 | 35 | 57 | 508 | 378 | 442 |
|             | 451 | 331 | 35 | 57 | 503 | 371 | 442 | 453 | 326 | 38 | 57 | 506 | 380 | 440 |
|             | 451 | 331 | 35 | 57 | 503 | 371 | 442 | 452 | 326 | 35 | 57 | 504 | 377 | 436 |
|             | 451 | 331 | 35 | 57 | 503 | 371 | 442 | 451 | 326 | 35 | 57 | 504 | 376 | 434 |
|             | 451 | 331 | 35 | 57 | 503 | 371 | 442 | 453 | 331 | 40 | 57 | 507 | 376 | 434 |
|             | 451 | 331 | 35 | 57 | 503 | 371 | 442 | 450 | 328 | 40 | 57 | 505 | 377 | 437 |
|             | 451 | 331 | 35 | 57 | 503 | 371 | 442 | 450 | 328 | 35 | 57 | 504 | 375 | 437 |
|             | 451 | 331 | 35 | 57 | 503 | 371 | 442 | 451 | 328 | 35 | 57 | 504 | 376 | 435 |
|             | 451 | 331 | 35 | 57 | 503 | 371 | 442 | 450 | 329 | 35 | 57 | 504 | 380 | 439 |
|             | 451 | 331 | 35 | 57 | 503 | 371 | 442 | 452 | 328 | 37 | 57 | 507 | 377 | 436 |
|             | 451 | 331 | 35 | 57 | 503 | 371 | 442 | 450 | 329 | 35 | 57 | 505 | 381 | 438 |
|             | 451 | 331 | 35 | 57 | 503 | 371 | 442 | 452 | 326 | 35 | 57 | 505 | 374 | 434 |
|             | 451 | 331 | 35 | 57 | 503 | 371 | 442 | 450 | 326 | 35 | 57 | 504 | 374 | 433 |
|             | 451 | 331 | 35 | 57 | 503 | 371 | 442 | 450 | 328 | 38 | 57 | 504 | 375 | 433 |
|             | 451 | 331 | 35 | 57 | 503 | 371 | 442 | 450 | 326 | 35 | 57 | 504 | 379 | 433 |
|             | 451 | 331 | 35 | 57 | 503 | 371 | 442 | 452 | 327 | 35 | 57 | 504 | 378 | 435 |
|             | 451 | 331 | 35 | 57 | 503 | 371 | 442 | 451 | 328 | 35 | 57 | 504 | 376 | 436 |

|     |     |    |    |     |     |     |     |     |    |    |     |     |     |
|-----|-----|----|----|-----|-----|-----|-----|-----|----|----|-----|-----|-----|
| 451 | 331 | 35 | 57 | 503 | 371 | 442 | 450 | 328 | 35 | 57 | 504 | 376 | 440 |
| 451 | 331 | 35 | 57 | 503 | 371 | 442 | 450 | 330 | 35 | 57 | 504 | 381 | 437 |
| 451 | 331 | 35 | 57 | 503 | 371 | 442 | 453 | 332 | 35 | 53 | 505 | 383 | 433 |
| 451 | 331 | 35 | 57 | 503 | 371 | 442 | 453 | 330 | 35 | 53 | 505 | 380 | 433 |
| 451 | 331 | 35 | 57 | 503 | 371 | 442 | 451 | 334 | 35 | 57 | 506 | 381 | 436 |
| 451 | 331 | 35 | 57 | 503 | 371 | 442 | 451 | 330 | 35 | 53 | 505 | 380 | 436 |
| 451 | 331 | 35 | 57 | 503 | 371 | 442 | 453 | 332 | 35 | 53 | 505 | 379 | 433 |
| 451 | 331 | 35 | 57 | 503 | 371 | 442 | 451 | 330 | 35 | 57 | 505 | 383 | 440 |
| 451 | 331 | 35 | 57 | 503 | 371 | 442 | 451 | 334 | 35 | 55 | 505 | 381 | 433 |
| 451 | 331 | 35 | 57 | 503 | 371 | 442 | 451 | 331 | 35 | 53 | 505 | 383 | 435 |
| 451 | 331 | 35 | 57 | 503 | 371 | 442 | 453 | 333 | 35 | 56 | 507 | 382 | 433 |
| 451 | 331 | 35 | 57 | 503 | 371 | 442 | 451 | 331 | 35 | 53 | 505 | 387 | 437 |
| 451 | 331 | 35 | 57 | 503 | 371 | 442 | 454 | 333 | 35 | 54 | 508 | 382 | 435 |
| 451 | 331 | 35 | 57 | 503 | 371 | 442 | 453 | 333 | 35 | 53 | 507 | 372 | 435 |
| 451 | 331 | 35 | 57 | 503 | 371 | 442 | 454 | 331 | 35 | 53 | 507 | 373 | 437 |
| 451 | 331 | 35 | 57 | 503 | 371 | 442 | 449 | 325 | 33 | 49 | 506 | 378 | 436 |
| 451 | 331 | 35 | 57 | 503 | 371 | 442 | 453 | 329 | 35 | 59 | 506 | 381 | 443 |
| 451 | 331 | 35 | 57 | 503 | 371 | 442 | 450 | 334 | 35 | 57 | 503 | 381 | 446 |
| 451 | 331 | 35 | 57 | 503 | 371 | 442 | 450 | 332 | 35 | 57 | 505 | 382 | 442 |
| 451 | 331 | 35 | 57 | 503 | 371 | 442 | 449 | 333 | 35 | 57 | 504 | 380 | 442 |
| 451 | 331 | 35 | 57 | 503 | 371 | 442 | 451 | 331 | 35 | 57 | 505 | 382 | 444 |
| 451 | 331 | 35 | 57 | 503 | 371 | 442 | 450 | 334 | 35 | 57 | 502 | 381 | 444 |
| 451 | 331 | 35 | 57 | 503 | 371 | 442 | 450 | 328 | 35 | 57 | 505 | 386 | 446 |
| 451 | 331 | 35 | 57 | 503 | 371 | 442 | 450 | 330 | 35 | 57 | 506 | 381 | 442 |
| 451 | 331 | 35 | 57 | 503 | 371 | 442 | 452 | 331 | 35 | 57 | 503 | 382 | 450 |
| 451 | 331 | 35 | 57 | 503 | 371 | 442 | 450 | 331 | 35 | 57 | 504 | 381 | 442 |
| 451 | 331 | 35 | 57 | 503 | 371 | 442 | 450 | 331 | 35 | 57 | 505 | 383 | 442 |
| 451 | 331 | 35 | 57 | 503 | 371 | 442 | 452 | 334 | 35 | 57 | 505 | 381 | 442 |
| 451 | 331 | 35 | 57 | 503 | 371 | 442 | 448 | 331 | 35 | 60 | 504 | 385 | 446 |
| 451 | 331 | 35 | 57 | 503 | 371 | 442 | 454 | 333 | 35 | 63 | 506 | 378 | 439 |
| 451 | 331 | 35 | 57 | 503 | 371 | 442 | 452 | 329 | 35 | 61 | 505 | 380 | 436 |
| 451 | 331 | 35 | 57 | 503 | 371 | 442 | 451 | 335 | 35 | 66 | 505 | 378 | 438 |
| 451 | 331 | 35 | 57 | 503 | 371 | 442 | 453 | 330 | 35 | 57 | 505 | 379 | 440 |
| 451 | 331 | 35 | 57 | 503 | 371 | 442 | 453 | 332 | 35 | 57 | 504 | 374 | 439 |
| 451 | 331 | 35 | 57 | 503 | 371 | 442 | 452 | 332 | 35 | 61 | 505 | 377 | 436 |
| 451 | 331 | 35 | 57 | 503 | 371 | 442 | 455 | 334 | 35 | 72 | 506 | 379 | 449 |
| 451 | 331 | 35 | 57 | 503 | 371 | 442 | 454 | 331 | 38 | 53 | 507 | 375 | 434 |
| 451 | 331 | 35 | 57 | 503 | 371 | 442 | 453 | 329 | 35 | 53 | 507 | 374 | 434 |
| 451 | 331 | 35 | 57 | 503 | 371 | 442 | 453 | 336 | 35 | 53 | 506 | 374 | 433 |
| 451 | 331 | 35 | 57 | 503 | 371 | 442 | 453 | 331 | 35 | 53 | 506 | 375 | 433 |
| 451 | 331 | 35 | 57 | 503 | 371 | 442 | 451 | 331 | 35 | 57 | 506 | 375 | 431 |
| 451 | 331 | 35 | 57 | 503 | 371 | 442 | 453 | 332 | 35 | 53 | 506 | 379 | 434 |
| 451 | 331 | 35 | 57 | 503 | 371 | 442 | 451 | 334 | 35 | 57 | 503 | 376 | 438 |

|     |     |    |    |     |     |     |     |     |    |    |     |     |     |
|-----|-----|----|----|-----|-----|-----|-----|-----|----|----|-----|-----|-----|
| 451 | 331 | 35 | 57 | 503 | 371 | 442 | 451 | 329 | 35 | 57 | 507 | 378 | 447 |
| 451 | 331 | 35 | 57 | 503 | 371 | 442 | 451 | 331 | 35 | 64 | 505 | 379 | 443 |
| 451 | 331 | 35 | 57 | 503 | 371 | 442 | 452 | 331 | 35 | 66 | 504 | 381 | 436 |
| 451 | 331 | 35 | 57 | 503 | 371 | 442 | 452 | 331 | 35 | 66 | 504 | 379 | 434 |
| 451 | 331 | 35 | 57 | 503 | 371 | 442 | 450 | 331 | 35 | 68 | 505 | 376 | 435 |
| 451 | 331 | 35 | 57 | 503 | 371 | 442 | 449 | 332 | 35 | 67 | 504 | 385 | 441 |
| 451 | 331 | 35 | 57 | 503 | 371 | 442 | 452 | 333 | 35 | 57 | 503 | 382 | 438 |
| 451 | 331 | 35 | 57 | 503 | 371 | 442 | 450 | 331 | 35 | 57 | 503 | 376 | 436 |
| 451 | 331 | 35 | 57 | 503 | 371 | 442 | 451 | 331 | 35 | 66 | 504 | 381 | 443 |
| 451 | 331 | 35 | 57 | 503 | 371 | 442 | 449 | 331 | 35 | 62 | 503 | 379 | 432 |
| 451 | 331 | 35 | 57 | 503 | 371 | 442 | 450 | 331 | 35 | 63 | 504 | 380 | 439 |
| 451 | 331 | 35 | 57 | 503 | 371 | 442 | 448 | 332 | 35 | 57 | 504 | 380 | 442 |
| 451 | 331 | 35 | 57 | 503 | 371 | 442 | 454 | 329 | 35 | 57 | 505 | 374 | 438 |
| 451 | 331 | 35 | 57 | 503 | 371 | 442 | 454 | 331 | 35 | 59 | 507 | 382 | 444 |
| 451 | 331 | 35 | 57 | 503 | 371 | 442 | 454 | 331 | 35 | 57 | 505 | 376 | 438 |
| 451 | 331 | 35 | 57 | 503 | 371 | 442 | 452 | 329 | 35 | 57 | 505 | 376 | 438 |
| 451 | 331 | 35 | 57 | 503 | 371 | 442 | 454 | 332 | 35 | 62 | 505 | 378 | 438 |
| 451 | 331 | 35 | 57 | 503 | 371 | 442 | 452 | 332 | 35 | 62 | 505 | 381 | 442 |
| 451 | 331 | 35 | 57 | 503 | 371 | 442 | 452 | 334 | 35 | 59 | 506 | 378 | 440 |
| 451 | 331 | 35 | 57 | 503 | 371 | 442 | 451 | 331 | 35 | 57 | 505 | 378 | 440 |
| 451 | 331 | 35 | 57 | 503 | 371 | 442 | 452 | 331 | 35 | 57 | 505 | 377 | 438 |
| 451 | 331 | 35 | 57 | 503 | 371 | 442 | 451 | 333 | 35 | 65 | 503 | 380 | 441 |
| 451 | 331 | 35 | 57 | 503 | 371 | 442 | 453 | 333 | 35 | 59 | 505 | 374 | 443 |
| 451 | 331 | 35 | 57 | 503 | 371 | 442 | 451 | 331 | 35 | 57 | 505 | 376 | 437 |
| 451 | 331 | 35 | 57 | 503 | 371 | 442 | 454 | 331 | 35 | 57 | 505 | 376 | 438 |
| 451 | 331 | 35 | 57 | 503 | 371 | 442 | 451 | 329 | 35 | 61 | 503 | 378 | 439 |
| 451 | 331 | 35 | 57 | 503 | 371 | 442 | 454 | 329 | 35 | 57 | 510 | 379 | 439 |
| 451 | 331 | 35 | 57 | 503 | 371 | 442 | 452 | 335 | 35 | 57 | 505 | 376 | 437 |
| 451 | 331 | 35 | 57 | 503 | 371 | 442 | 453 | 332 | 35 | 62 | 506 | 385 | 440 |
| 451 | 331 | 35 | 57 | 503 | 371 | 442 | 453 | 331 | 35 | 67 | 505 | 379 | 434 |
| 451 | 331 | 35 | 57 | 503 | 371 | 442 | 451 | 326 | 35 | 62 | 505 | 377 | 433 |
| 451 | 331 | 35 | 57 | 503 | 371 | 442 | 451 | 328 | 35 | 57 | 505 | 378 | 434 |
| 451 | 331 | 35 | 57 | 503 | 371 | 442 | 452 | 330 | 35 | 63 | 506 | 385 | 439 |
| 451 | 331 | 35 | 57 | 503 | 371 | 442 | 451 | 328 | 35 | 57 | 503 | 376 | 437 |
| 451 | 331 | 35 | 57 | 503 | 371 | 442 | 451 | 329 | 35 | 62 | 505 | 381 | 433 |
| 451 | 331 | 35 | 57 | 503 | 371 | 442 | 453 | 330 | 35 | 57 | 505 | 380 | 441 |
| 451 | 331 | 35 | 57 | 503 | 371 | 442 | 447 | 331 | 31 | 57 | 503 | 377 | 439 |
| 451 | 331 | 35 | 57 | 503 | 371 | 442 | 451 | 327 | 35 | 57 | 505 | 378 | 438 |
| 451 | 331 | 35 | 57 | 503 | 371 | 442 | 451 | 334 | 35 | 55 | 503 | 379 | 432 |
| 451 | 331 | 35 | 57 | 503 | 371 | 442 | 451 | 333 | 35 | 61 | 503 | 382 | 439 |
| 451 | 331 | 35 | 57 | 503 | 371 | 442 | 452 | 336 | 39 | 57 | 506 | 383 | 439 |
| 451 | 331 | 35 | 57 | 503 | 371 | 442 | 452 | 331 | 35 | 57 | 506 | 381 | 437 |
| 451 | 331 | 35 | 57 | 503 | 371 | 442 | 453 | 330 | 35 | 57 | 505 | 379 | 439 |

|     |     |    |    |     |     |     |     |     |    |    |     |     |     |
|-----|-----|----|----|-----|-----|-----|-----|-----|----|----|-----|-----|-----|
| 451 | 331 | 35 | 57 | 503 | 371 | 442 | 450 | 327 | 35 | 57 | 507 | 376 | 440 |
| 451 | 331 | 35 | 57 | 503 | 371 | 442 | 451 | 329 | 35 | 57 | 505 | 380 | 442 |
| 451 | 331 | 35 | 57 | 503 | 371 | 442 | 452 | 333 | 35 | 57 | 507 | 378 | 444 |
| 451 | 331 | 35 | 57 | 503 | 371 | 442 | 451 | 331 | 35 | 57 | 506 | 375 | 442 |
| 451 | 331 | 35 | 57 | 503 | 371 | 442 | 451 | 333 | 35 | 57 | 506 | 378 | 442 |
| 451 | 331 | 35 | 57 | 503 | 371 | 442 | 453 | 330 | 35 | 57 | 506 | 376 | 441 |
| 451 | 331 | 35 | 57 | 503 | 371 | 442 | 453 | 328 | 35 | 57 | 506 | 375 | 440 |
| 451 | 331 | 35 | 57 | 503 | 371 | 442 | 453 | 328 | 35 | 62 | 506 | 374 | 440 |
| 451 | 331 | 35 | 57 | 503 | 371 | 442 | 453 | 330 | 35 | 57 | 507 | 376 | 442 |
| 451 | 331 | 35 | 57 | 503 | 371 | 442 | 451 | 330 | 35 | 57 | 506 | 375 | 442 |
| 451 | 331 | 35 | 57 | 503 | 371 | 442 | 451 | 328 | 35 | 57 | 506 | 376 | 440 |
| 451 | 331 | 35 | 57 | 503 | 371 | 442 | 451 | 331 | 35 | 57 | 506 | 379 | 440 |
| 451 | 331 | 35 | 57 | 503 | 371 | 442 | 453 | 329 | 35 | 57 | 506 | 378 | 440 |
| 451 | 331 | 35 | 57 | 503 | 371 | 442 | 454 | 329 | 35 | 57 | 506 | 374 | 441 |
| 451 | 331 | 35 | 57 | 503 | 371 | 442 | 452 | 328 | 35 | 57 | 506 | 376 | 440 |
| 451 | 331 | 35 | 57 | 503 | 371 | 442 | 453 | 333 | 35 | 57 | 506 | 377 | 441 |
| 451 | 331 | 35 | 57 | 503 | 371 | 442 | 453 | 334 | 35 | 57 | 505 | 373 | 436 |
| 451 | 331 | 35 | 57 | 503 | 371 | 442 | 451 | 333 | 35 | 57 | 505 | 376 | 435 |
| 451 | 331 | 35 | 57 | 503 | 371 | 442 | 451 | 330 | 35 | 57 | 505 | 373 | 436 |
| 451 | 331 | 35 | 57 | 503 | 371 | 442 | 451 | 333 | 35 | 57 | 505 | 372 | 435 |
| 451 | 331 | 35 | 57 | 503 | 371 | 442 | 452 | 333 | 35 | 57 | 505 | 375 | 436 |
| 451 | 331 | 35 | 57 | 503 | 371 | 442 | 451 | 332 | 35 | 57 | 505 | 378 | 437 |
| 451 | 331 | 35 | 57 | 503 | 371 | 442 | 447 | 329 | 35 | 57 | 501 | 382 | 441 |
| 451 | 331 | 35 | 57 | 503 | 371 | 442 | 447 | 333 | 35 | 57 | 499 | 379 | 441 |
| 451 | 331 | 35 | 57 | 503 | 371 | 442 | 454 | 330 | 35 | 57 | 509 | 381 | 434 |
| 451 | 331 | 35 | 57 | 503 | 371 | 442 | 452 | 332 | 35 | 57 | 506 | 376 | 443 |
| 451 | 331 | 35 | 57 | 503 | 371 | 442 | 452 | 331 | 35 | 57 | 507 | 377 | 442 |
| 451 | 331 | 35 | 57 | 503 | 371 | 442 | 450 | 331 | 32 | 57 | 503 | 374 | 437 |
| 451 | 331 | 35 | 57 | 503 | 371 | 442 | 450 | 328 | 32 | 63 | 504 | 375 | 442 |
| 451 | 331 | 35 | 57 | 503 | 371 | 442 | 452 | 330 | 35 | 57 | 505 | 375 | 446 |
| 451 | 331 | 35 | 57 | 503 | 371 | 442 | 452 | 331 | 35 | 57 | 504 | 375 | 442 |
| 451 | 331 | 35 | 57 | 503 | 371 | 442 | 451 | 331 | 35 | 57 | 504 | 375 | 442 |
| 451 | 331 | 35 | 57 | 503 | 371 | 442 | 452 | 332 | 35 | 62 | 504 | 376 | 451 |
| 451 | 331 | 35 | 57 | 503 | 371 | 442 | 449 | 331 | 35 | 62 | 503 | 379 | 444 |
| 451 | 331 | 35 | 57 | 503 | 371 | 442 | 449 | 331 | 35 | 57 | 505 | 375 | 443 |
| 451 | 331 | 35 | 57 | 503 | 371 | 442 | 449 | 331 | 35 | 57 | 504 | 376 | 442 |
| 451 | 331 | 35 | 57 | 503 | 371 | 442 | 450 | 330 | 35 | 57 | 502 | 375 | 444 |
| 451 | 331 | 35 | 57 | 503 | 371 | 442 | 449 | 331 | 35 | 57 | 504 | 376 | 450 |
| 451 | 331 | 35 | 57 | 503 | 371 | 442 | 453 | 335 | 35 | 57 | 506 | 375 | 442 |
| 451 | 331 | 35 | 57 | 503 | 371 | 442 | 449 | 332 | 35 | 57 | 504 | 375 | 442 |
| 451 | 331 | 35 | 57 | 503 | 371 | 442 | 451 | 332 | 35 | 57 | 505 | 377 | 442 |
| 451 | 331 | 35 | 57 | 503 | 371 | 442 | 451 | 330 | 35 | 57 | 505 | 376 | 442 |
| 451 | 331 | 35 | 57 | 503 | 371 | 442 | 453 | 335 | 39 | 57 | 507 | 381 | 437 |



|     |     |    |    |     |     |     |     |     |    |    |     |     |     |
|-----|-----|----|----|-----|-----|-----|-----|-----|----|----|-----|-----|-----|
| 451 | 331 | 35 | 57 | 503 | 371 | 442 | 453 | 331 | 35 | 57 | 505 | 378 | 441 |
| 451 | 331 | 35 | 57 | 503 | 371 | 442 | 453 | 333 | 35 | 57 | 505 | 381 | 434 |
| 451 | 331 | 35 | 57 | 503 | 371 | 442 | 451 | 332 | 35 | 57 | 504 | 379 | 436 |
| 451 | 331 | 35 | 57 | 503 | 371 | 442 | 452 | 332 | 35 | 57 | 503 | 381 | 445 |
| 451 | 331 | 35 | 57 | 503 | 371 | 442 | 452 | 333 | 35 | 57 | 503 | 379 | 439 |
| 451 | 331 | 35 | 57 | 503 | 371 | 442 | 453 | 329 | 35 | 57 | 505 | 378 | 438 |
| 451 | 331 | 35 | 57 | 503 | 371 | 442 | 450 | 328 | 35 | 66 | 501 | 379 | 439 |
| 451 | 331 | 35 | 57 | 503 | 371 | 442 | 454 | 331 | 35 | 57 | 502 | 380 | 437 |
| 451 | 331 | 35 | 57 | 503 | 371 | 442 | 454 | 338 | 35 | 64 | 505 | 385 | 440 |
| 451 | 331 | 35 | 57 | 503 | 371 | 442 | 453 | 334 | 35 | 69 | 505 | 380 | 449 |
| 451 | 331 | 35 | 57 | 503 | 371 | 442 | 446 | 331 | 35 | 57 | 503 | 379 | 438 |
| 451 | 331 | 35 | 57 | 503 | 371 | 442 | 453 | 329 | 35 | 57 | 505 | 373 | 432 |
| 451 | 331 | 35 | 57 | 503 | 371 | 442 | 452 | 334 | 35 | 57 | 506 | 377 | 439 |
| 451 | 331 | 35 | 57 | 503 | 371 | 442 | 454 | 334 | 35 | 57 | 506 | 377 | 437 |
| 451 | 331 | 35 | 57 | 503 | 371 | 442 | 451 | 334 | 35 | 57 | 505 | 380 | 437 |
| 451 | 331 | 35 | 57 | 503 | 371 | 442 | 452 | 334 | 35 | 57 | 506 | 379 | 440 |
| 451 | 331 | 35 | 57 | 503 | 371 | 442 | 453 | 336 | 35 | 57 | 505 | 380 | 438 |
| 451 | 331 | 35 | 57 | 503 | 371 | 442 | 454 | 331 | 35 | 57 | 506 | 385 | 442 |
| 451 | 331 | 35 | 57 | 503 | 371 | 442 | 454 | 335 | 35 | 57 | 506 | 383 | 438 |
| 451 | 331 | 35 | 57 | 503 | 371 | 442 | 452 | 336 | 35 | 57 | 506 | 382 | 437 |
| 451 | 331 | 35 | 57 | 503 | 371 | 442 | 454 | 333 | 35 | 57 | 507 | 383 | 439 |
| 451 | 331 | 35 | 57 | 503 | 371 | 442 | 452 | 330 | 35 | 57 | 506 | 377 | 438 |
| 451 | 331 | 35 | 57 | 503 | 371 | 442 | 453 | 335 | 35 | 57 | 507 | 386 | 442 |
| 451 | 331 | 35 | 57 | 503 | 371 | 442 | 452 | 333 | 35 | 57 | 506 | 382 | 437 |
| 451 | 331 | 35 | 57 | 503 | 371 | 442 | 454 | 330 | 35 | 57 | 506 | 379 | 438 |
| 451 | 331 | 35 | 57 | 503 | 371 | 442 | 453 | 332 | 35 | 57 | 507 | 379 | 437 |
| 451 | 331 | 35 | 57 | 503 | 371 | 442 | 451 | 331 | 35 | 57 | 509 | 376 | 444 |
| 451 | 331 | 35 | 57 | 503 | 371 | 442 | 453 | 329 | 35 | 57 | 509 | 375 | 442 |
| 451 | 331 | 35 | 57 | 503 | 371 | 442 | 452 | 329 | 35 | 57 | 509 | 376 | 442 |
| 451 | 331 | 35 | 57 | 503 | 371 | 442 | 454 | 336 | 38 | 57 | 505 | 381 | 440 |
| 451 | 331 | 35 | 57 | 503 | 371 | 442 | 453 | 336 | 35 | 63 | 506 | 382 | 440 |
| 451 | 331 | 35 | 57 | 503 | 371 | 442 | 453 | 334 | 35 | 63 | 506 | 381 | 435 |
| 451 | 331 | 35 | 57 | 503 | 371 | 442 | 451 | 331 | 35 | 57 | 505 | 378 | 435 |
| 451 | 331 | 35 | 57 | 503 | 371 | 442 | 452 | 333 | 35 | 57 | 504 | 377 | 438 |
| 451 | 331 | 35 | 57 | 503 | 371 | 442 | 451 | 333 | 35 | 57 | 503 | 380 | 437 |
| 451 | 331 | 35 | 57 | 503 | 371 | 442 | 451 | 332 | 35 | 57 | 505 | 379 | 435 |
| 451 | 331 | 35 | 57 | 503 | 371 | 442 | 452 | 333 | 35 | 57 | 505 | 377 | 437 |
| 451 | 331 | 35 | 57 | 503 | 371 | 442 | 452 | 336 | 35 | 57 | 504 | 375 | 437 |
| 451 | 331 | 35 | 57 | 503 | 371 | 442 | 451 | 335 | 35 | 57 | 506 | 378 | 443 |
| 451 | 331 | 35 | 57 | 503 | 371 | 442 | 453 | 332 | 35 | 57 | 504 | 376 | 441 |
| 451 | 331 | 35 | 57 | 503 | 371 | 442 | 451 | 331 | 35 | 63 | 501 | 375 | 441 |
| 451 | 331 | 35 | 57 | 503 | 371 | 442 | 452 | 326 | 35 | 57 | 505 | 374 | 442 |
| 451 | 331 | 35 | 57 | 503 | 371 | 442 | 450 | 328 | 35 | 57 | 503 | 376 | 442 |

|     |     |    |    |     |     |     |     |     |    |    |     |     |     |
|-----|-----|----|----|-----|-----|-----|-----|-----|----|----|-----|-----|-----|
| 451 | 331 | 35 | 57 | 503 | 371 | 442 | 450 | 328 | 35 | 57 | 505 | 379 | 442 |
| 451 | 331 | 35 | 57 | 503 | 371 | 442 | 450 | 327 | 35 | 57 | 503 | 374 | 442 |
| 451 | 331 | 35 | 57 | 503 | 371 | 442 | 450 | 327 | 35 | 57 | 505 | 375 | 444 |
| 451 | 331 | 35 | 57 | 503 | 371 | 442 | 449 | 332 | 35 | 51 | 502 | 377 | 433 |
| 451 | 331 | 35 | 57 | 503 | 371 | 442 | 450 | 333 | 35 | 51 | 500 | 370 | 435 |
| 451 | 331 | 35 | 57 | 503 | 371 | 442 | 451 | 333 | 35 | 56 | 506 | 376 | 442 |
| 451 | 331 | 35 | 57 | 503 | 371 | 442 | 453 | 330 | 35 | 57 | 504 | 372 | 443 |
| 451 | 331 | 35 | 57 | 503 | 371 | 442 | 452 | 331 | 35 | 55 | 503 | 372 | 437 |

|                |  |  |  |  |  |  |        |       |       |      |      |      |      |
|----------------|--|--|--|--|--|--|--------|-------|-------|------|------|------|------|
| <i>p-value</i> |  |  |  |  |  |  | 7,8934 | 0,090 | 0,074 | 7,85 | 2,75 | 1,12 | 7,94 |
|                |  |  |  |  |  |  | 3E-08  | 723   | 676   | E-05 | E-46 | E-86 | E-24 |

**Table S10. The total number of contacts for the wild protein and their 344 mutants of the  $\beta$ -glucosidase (hydrolase; IBGA).**

Proteus ID: 4L8HLU. Available at <<http://proteus.dcc.ufmg.br/result/id/4L8HLU>>. Contacts were calculated using Arpeggio script tool (Jubb et al., 2017). P-value was calculated using T-Test function (parameters: paired and single tailed) from MS Excel software.

Definitions – wt: wild type; mt: mutant; hb: Hydrogen bond; whb: Weak hydrogen bond; i: Ionic interaction; a: Aromatic interaction; po: Polar interaction; wp: Weak polar interaction; hy: Hydrophobic interaction. \*Each line represents a mutant compared to the unique wild type.

| Protein   | wt*  |     |     |     |     |     |     | mt  |     |     |     |     |     |     |     |
|-----------|------|-----|-----|-----|-----|-----|-----|-----|-----|-----|-----|-----|-----|-----|-----|
|           | Type | hb  | whb | i   | a   | po  | wp  | hy  | hb  | whb | i   | a   | po  | wp  | hy  |
| Contacts* |      | 797 | 703 | 108 | 197 | 922 | 773 | 880 | 797 | 698 | 108 | 188 | 922 | 776 | 874 |
|           |      | 797 | 703 | 108 | 197 | 922 | 773 | 880 | 800 | 703 | 108 | 188 | 925 | 783 | 874 |
|           |      | 797 | 703 | 108 | 197 | 922 | 773 | 880 | 799 | 701 | 108 | 188 | 925 | 778 | 873 |
|           |      | 797 | 703 | 108 | 197 | 922 | 773 | 880 | 799 | 706 | 108 | 188 | 926 | 782 | 875 |
|           |      | 797 | 703 | 108 | 197 | 922 | 773 | 880 | 799 | 701 | 108 | 188 | 924 | 778 | 873 |
|           |      | 797 | 703 | 108 | 197 | 922 | 773 | 880 | 797 | 704 | 108 | 194 | 924 | 779 | 873 |
|           |      | 797 | 703 | 108 | 197 | 922 | 773 | 880 | 797 | 701 | 108 | 188 | 924 | 777 | 875 |
|           |      | 797 | 703 | 108 | 197 | 922 | 773 | 880 | 797 | 700 | 108 | 196 | 924 | 782 | 877 |
|           |      | 797 | 703 | 108 | 197 | 922 | 773 | 880 | 796 | 702 | 108 | 202 | 922 | 783 | 878 |
|           |      | 797 | 703 | 108 | 197 | 922 | 773 | 880 | 797 | 703 | 108 | 197 | 923 | 780 | 881 |
|           |      | 797 | 703 | 108 | 197 | 922 | 773 | 880 | 800 | 701 | 108 | 197 | 925 | 780 | 877 |
|           |      | 797 | 703 | 108 | 197 | 922 | 773 | 880 | 800 | 701 | 108 | 197 | 924 | 779 | 878 |
|           |      | 797 | 703 | 108 | 197 | 922 | 773 | 880 | 798 | 700 | 108 | 204 | 925 | 777 | 876 |
|           |      | 797 | 703 | 108 | 197 | 922 | 773 | 880 | 797 | 702 | 105 | 197 | 923 | 775 | 880 |
|           |      | 797 | 703 | 108 | 197 | 922 | 773 | 880 | 796 | 709 | 108 | 197 | 922 | 784 | 881 |
|           |      | 797 | 703 | 108 | 197 | 922 | 773 | 880 | 796 | 704 | 108 | 197 | 924 | 778 | 880 |
|           |      | 797 | 703 | 108 | 197 | 922 | 773 | 880 | 797 | 705 | 108 | 197 | 921 | 778 | 880 |
|           |      | 797 | 703 | 108 | 197 | 922 | 773 | 880 | 797 | 704 | 108 | 197 | 923 | 776 | 880 |
|           |      | 797 | 703 | 108 | 197 | 922 | 773 | 880 | 792 | 700 | 102 | 197 | 920 | 776 | 874 |
|           |      | 797 | 703 | 108 | 197 | 922 | 773 | 880 | 794 | 698 | 100 | 202 | 920 | 780 | 874 |
|           |      | 797 | 703 | 108 | 197 | 922 | 773 | 880 | 797 | 697 | 100 | 197 | 923 | 775 | 879 |
|           |      | 797 | 703 | 108 | 197 | 922 | 773 | 880 | 797 | 702 | 105 | 197 | 925 | 784 | 882 |
|           |      | 797 | 703 | 108 | 197 | 922 | 773 | 880 | 797 | 700 | 108 | 197 | 922 | 777 | 882 |
|           |      | 797 | 703 | 108 | 197 | 922 | 773 | 880 | 797 | 698 | 108 | 197 | 922 | 773 | 880 |
|           |      | 797 | 703 | 108 | 197 | 922 | 773 | 880 | 792 | 699 | 106 | 197 | 921 | 777 | 876 |
|           |      | 797 | 703 | 108 | 197 | 922 | 773 | 880 | 795 | 699 | 106 | 197 | 923 | 779 | 881 |
|           |      | 797 | 703 | 108 | 197 | 922 | 773 | 880 | 799 | 701 | 106 | 197 | 926 | 774 | 880 |
|           |      | 797 | 703 | 108 | 197 | 922 | 773 | 880 | 797 | 701 | 106 | 197 | 925 | 777 | 882 |
|           |      | 797 | 703 | 108 | 197 | 922 | 773 | 880 | 797 | 701 | 106 | 197 | 926 | 779 | 880 |
|           |      | 797 | 703 | 108 | 197 | 922 | 773 | 880 | 799 | 702 | 106 | 197 | 927 | 775 | 880 |
|           |      | 797 | 703 | 108 | 197 | 922 | 773 | 880 | 799 | 701 | 106 | 197 | 926 | 775 | 880 |
|           |      | 797 | 703 | 108 | 197 | 922 | 773 | 880 | 799 | 701 | 106 | 197 | 925 | 775 | 880 |

|     |     |     |     |     |     |     |     |     |     |     |     |     |     |
|-----|-----|-----|-----|-----|-----|-----|-----|-----|-----|-----|-----|-----|-----|
| 797 | 703 | 108 | 197 | 922 | 773 | 880 | 797 | 701 | 106 | 197 | 925 | 776 | 880 |
| 797 | 703 | 108 | 197 | 922 | 773 | 880 | 797 | 701 | 106 | 197 | 927 | 777 | 880 |
| 797 | 703 | 108 | 197 | 922 | 773 | 880 | 799 | 701 | 106 | 204 | 926 | 776 | 886 |
| 797 | 703 | 108 | 197 | 922 | 773 | 880 | 796 | 701 | 108 | 201 | 923 | 779 | 876 |
| 797 | 703 | 108 | 197 | 922 | 773 | 880 | 797 | 701 | 108 | 197 | 924 | 777 | 878 |
| 797 | 703 | 108 | 197 | 922 | 773 | 880 | 801 | 700 | 109 | 197 | 928 | 780 | 877 |
| 797 | 703 | 108 | 197 | 922 | 773 | 880 | 797 | 700 | 108 | 197 | 925 | 778 | 877 |
| 797 | 703 | 108 | 197 | 922 | 773 | 880 | 797 | 703 | 108 | 197 | 924 | 782 | 873 |
| 797 | 703 | 108 | 197 | 922 | 773 | 880 | 799 | 703 | 108 | 192 | 925 | 778 | 876 |
| 797 | 703 | 108 | 197 | 922 | 773 | 880 | 797 | 704 | 108 | 192 | 924 | 775 | 875 |
| 797 | 703 | 108 | 197 | 922 | 773 | 880 | 800 | 705 | 108 | 192 | 924 | 777 | 877 |
| 797 | 703 | 108 | 197 | 922 | 773 | 880 | 798 | 704 | 108 | 194 | 924 | 780 | 880 |
| 797 | 703 | 108 | 197 | 922 | 773 | 880 | 799 | 704 | 108 | 192 | 924 | 778 | 873 |
| 797 | 703 | 108 | 197 | 922 | 773 | 880 | 799 | 705 | 108 | 192 | 924 | 780 | 876 |
| 797 | 703 | 108 | 197 | 922 | 773 | 880 | 797 | 700 | 108 | 194 | 924 | 783 | 877 |
| 797 | 703 | 108 | 197 | 922 | 773 | 880 | 797 | 697 | 108 | 189 | 922 | 777 | 865 |
| 797 | 703 | 108 | 197 | 922 | 773 | 880 | 799 | 698 | 108 | 197 | 924 | 776 | 866 |
| 797 | 703 | 108 | 197 | 922 | 773 | 880 | 795 | 697 | 108 | 193 | 924 | 776 | 866 |
| 797 | 703 | 108 | 197 | 922 | 773 | 880 | 797 | 697 | 108 | 203 | 926 | 786 | 875 |
| 797 | 703 | 108 | 197 | 922 | 773 | 880 | 799 | 699 | 108 | 189 | 926 | 777 | 870 |
| 797 | 703 | 108 | 197 | 922 | 773 | 880 | 797 | 696 | 108 | 189 | 924 | 776 | 868 |
| 797 | 703 | 108 | 197 | 922 | 773 | 880 | 800 | 699 | 108 | 189 | 926 | 777 | 868 |
| 797 | 703 | 108 | 197 | 922 | 773 | 880 | 797 | 698 | 108 | 189 | 924 | 779 | 865 |
| 797 | 703 | 108 | 197 | 922 | 773 | 880 | 797 | 698 | 108 | 189 | 925 | 781 | 869 |
| 797 | 703 | 108 | 197 | 922 | 773 | 880 | 797 | 698 | 108 | 198 | 924 | 781 | 873 |
| 797 | 703 | 108 | 197 | 922 | 773 | 880 | 797 | 698 | 108 | 214 | 922 | 782 | 884 |
| 797 | 703 | 108 | 197 | 922 | 773 | 880 | 797 | 698 | 108 | 191 | 924 | 783 | 874 |
| 797 | 703 | 108 | 197 | 922 | 773 | 880 | 799 | 705 | 108 | 193 | 924 | 775 | 872 |
| 797 | 703 | 108 | 197 | 922 | 773 | 880 | 799 | 708 | 108 | 193 | 925 | 779 | 869 |
| 797 | 703 | 108 | 197 | 922 | 773 | 880 | 799 | 699 | 108 | 199 | 929 | 784 | 877 |
| 797 | 703 | 108 | 197 | 922 | 773 | 880 | 799 | 704 | 108 | 199 | 925 | 784 | 870 |
| 797 | 703 | 108 | 197 | 922 | 773 | 880 | 799 | 702 | 108 | 201 | 927 | 778 | 881 |
| 797 | 703 | 108 | 197 | 922 | 773 | 880 | 797 | 704 | 108 | 204 | 925 | 783 | 877 |
| 797 | 703 | 108 | 197 | 922 | 773 | 880 | 800 | 704 | 108 | 197 | 927 | 777 | 878 |
| 797 | 703 | 108 | 197 | 922 | 773 | 880 | 800 | 703 | 112 | 197 | 925 | 778 | 878 |
| 797 | 703 | 108 | 197 | 922 | 773 | 880 | 797 | 706 | 108 | 197 | 924 | 785 | 877 |
| 797 | 703 | 108 | 197 | 922 | 773 | 880 | 795 | 711 | 108 | 198 | 921 | 779 | 878 |
| 797 | 703 | 108 | 197 | 922 | 773 | 880 | 797 | 712 | 108 | 198 | 921 | 779 | 879 |
| 797 | 703 | 108 | 197 | 922 | 773 | 880 | 796 | 705 | 101 | 189 | 919 | 772 | 880 |
| 797 | 703 | 108 | 197 | 922 | 773 | 880 | 797 | 702 | 106 | 194 | 921 | 780 | 880 |

|     |     |     |     |     |     |     |     |     |     |     |     |     |     |
|-----|-----|-----|-----|-----|-----|-----|-----|-----|-----|-----|-----|-----|-----|
| 797 | 703 | 108 | 197 | 922 | 773 | 880 | 798 | 702 | 105 | 194 | 921 | 781 | 879 |
| 797 | 703 | 108 | 197 | 922 | 773 | 880 | 797 | 703 | 105 | 194 | 922 | 774 | 878 |
| 797 | 703 | 108 | 197 | 922 | 773 | 880 | 798 | 704 | 105 | 200 | 922 | 781 | 882 |
| 797 | 703 | 108 | 197 | 922 | 773 | 880 | 798 | 699 | 109 | 196 | 922 | 776 | 877 |
| 797 | 703 | 108 | 197 | 922 | 773 | 880 | 797 | 701 | 105 | 197 | 921 | 783 | 881 |
| 797 | 703 | 108 | 197 | 922 | 773 | 880 | 797 | 701 | 108 | 197 | 925 | 779 | 879 |
| 797 | 703 | 108 | 197 | 922 | 773 | 880 | 797 | 699 | 108 | 197 | 926 | 776 | 876 |
| 797 | 703 | 108 | 197 | 922 | 773 | 880 | 799 | 700 | 108 | 197 | 925 | 778 | 875 |
| 797 | 703 | 108 | 197 | 922 | 773 | 880 | 797 | 699 | 108 | 197 | 925 | 778 | 875 |
| 797 | 703 | 108 | 197 | 922 | 773 | 880 | 797 | 697 | 108 | 197 | 925 | 778 | 879 |
| 797 | 703 | 108 | 197 | 922 | 773 | 880 | 799 | 701 | 108 | 197 | 925 | 780 | 876 |
| 797 | 703 | 108 | 197 | 922 | 773 | 880 | 796 | 707 | 108 | 190 | 923 | 778 | 878 |
| 797 | 703 | 108 | 197 | 922 | 773 | 880 | 798 | 705 | 108 | 184 | 923 | 781 | 878 |
| 797 | 703 | 108 | 197 | 922 | 773 | 880 | 797 | 703 | 108 | 187 | 921 | 777 | 881 |
| 797 | 703 | 108 | 197 | 922 | 773 | 880 | 801 | 704 | 108 | 197 | 925 | 784 | 874 |
| 797 | 703 | 108 | 197 | 922 | 773 | 880 | 797 | 699 | 108 | 197 | 924 | 780 | 873 |
| 797 | 703 | 108 | 197 | 922 | 773 | 880 | 801 | 703 | 108 | 197 | 925 | 780 | 871 |
| 797 | 703 | 108 | 197 | 922 | 773 | 880 | 799 | 701 | 108 | 197 | 924 | 776 | 873 |
| 797 | 703 | 108 | 197 | 922 | 773 | 880 | 797 | 696 | 110 | 197 | 925 | 781 | 873 |
| 797 | 703 | 108 | 197 | 922 | 773 | 880 | 797 | 701 | 108 | 197 | 924 | 781 | 877 |
| 797 | 703 | 108 | 197 | 922 | 773 | 880 | 796 | 707 | 105 | 194 | 922 | 783 | 876 |
| 797 | 703 | 108 | 197 | 922 | 773 | 880 | 799 | 705 | 108 | 197 | 925 | 782 | 883 |
| 797 | 703 | 108 | 197 | 922 | 773 | 880 | 797 | 706 | 108 | 197 | 924 | 782 | 873 |
| 797 | 703 | 108 | 197 | 922 | 773 | 880 | 799 | 705 | 108 | 197 | 923 | 779 | 874 |
| 797 | 703 | 108 | 197 | 922 | 773 | 880 | 798 | 700 | 108 | 197 | 924 | 782 | 874 |
| 797 | 703 | 108 | 197 | 922 | 773 | 880 | 800 | 704 | 108 | 197 | 925 | 785 | 872 |
| 797 | 703 | 108 | 197 | 922 | 773 | 880 | 798 | 704 | 108 | 197 | 924 | 779 | 871 |
| 797 | 703 | 108 | 197 | 922 | 773 | 880 | 800 | 707 | 108 | 197 | 926 | 783 | 873 |
| 797 | 703 | 108 | 197 | 922 | 773 | 880 | 797 | 698 | 108 | 197 | 923 | 782 | 872 |
| 797 | 703 | 108 | 197 | 922 | 773 | 880 | 797 | 701 | 108 | 209 | 923 | 779 | 872 |
| 797 | 703 | 108 | 197 | 922 | 773 | 880 | 797 | 699 | 108 | 197 | 922 | 782 | 874 |
| 797 | 703 | 108 | 197 | 922 | 773 | 880 | 799 | 701 | 105 | 197 | 925 | 780 | 876 |
| 797 | 703 | 108 | 197 | 922 | 773 | 880 | 795 | 700 | 105 | 197 | 925 | 776 | 872 |
| 797 | 703 | 108 | 197 | 922 | 773 | 880 | 799 | 705 | 108 | 197 | 926 | 777 | 872 |
| 797 | 703 | 108 | 197 | 922 | 773 | 880 | 797 | 702 | 105 | 197 | 926 | 778 | 876 |
| 797 | 703 | 108 | 197 | 922 | 773 | 880 | 795 | 703 | 105 | 197 | 925 | 781 | 874 |
| 797 | 703 | 108 | 197 | 922 | 773 | 880 | 797 | 702 | 105 | 199 | 925 | 776 | 872 |
| 797 | 703 | 108 | 197 | 922 | 773 | 880 | 796 | 704 | 108 | 197 | 924 | 777 | 875 |
| 797 | 703 | 108 | 197 | 922 | 773 | 880 | 799 | 705 | 110 | 197 | 924 | 775 | 882 |
| 797 | 703 | 108 | 197 | 922 | 773 | 880 | 796 | 701 | 108 | 197 | 922 | 777 | 877 |

|     |     |     |     |     |     |     |     |     |     |     |     |     |     |
|-----|-----|-----|-----|-----|-----|-----|-----|-----|-----|-----|-----|-----|-----|
| 797 | 703 | 108 | 197 | 922 | 773 | 880 | 800 | 700 | 108 | 197 | 928 | 781 | 872 |
| 797 | 703 | 108 | 197 | 922 | 773 | 880 | 799 | 706 | 108 | 197 | 925 | 780 | 876 |
| 797 | 703 | 108 | 197 | 922 | 773 | 880 | 798 | 699 | 108 | 197 | 927 | 782 | 875 |
| 797 | 703 | 108 | 197 | 922 | 773 | 880 | 801 | 708 | 108 | 207 | 925 | 783 | 876 |
| 797 | 703 | 108 | 197 | 922 | 773 | 880 | 799 | 706 | 108 | 197 | 924 | 782 | 869 |
| 797 | 703 | 108 | 197 | 922 | 773 | 880 | 801 | 703 | 108 | 197 | 924 | 775 | 871 |
| 797 | 703 | 108 | 197 | 922 | 773 | 880 | 797 | 702 | 108 | 197 | 924 | 776 | 869 |
| 797 | 703 | 108 | 197 | 922 | 773 | 880 | 792 | 702 | 102 | 197 | 919 | 776 | 876 |
| 797 | 703 | 108 | 197 | 922 | 773 | 880 | 799 | 700 | 108 | 197 | 927 | 777 | 875 |
| 797 | 703 | 108 | 197 | 922 | 773 | 880 | 799 | 707 | 108 | 194 | 925 | 776 | 871 |
| 797 | 703 | 108 | 197 | 922 | 773 | 880 | 797 | 707 | 108 | 194 | 924 | 775 | 873 |
| 797 | 703 | 108 | 197 | 922 | 773 | 880 | 797 | 706 | 108 | 204 | 922 | 776 | 871 |
| 797 | 703 | 108 | 197 | 922 | 773 | 880 | 797 | 705 | 108 | 196 | 925 | 775 | 869 |
| 797 | 703 | 108 | 197 | 922 | 773 | 880 | 799 | 707 | 108 | 194 | 925 | 777 | 871 |
| 797 | 703 | 108 | 197 | 922 | 773 | 880 | 797 | 702 | 108 | 197 | 922 | 777 | 871 |
| 797 | 703 | 108 | 197 | 922 | 773 | 880 | 799 | 706 | 108 | 197 | 924 | 775 | 880 |
| 797 | 703 | 108 | 197 | 922 | 773 | 880 | 799 | 705 | 108 | 197 | 924 | 776 | 873 |
| 797 | 703 | 108 | 197 | 922 | 773 | 880 | 798 | 703 | 108 | 197 | 924 | 779 | 872 |
| 797 | 703 | 108 | 197 | 922 | 773 | 880 | 799 | 705 | 108 | 197 | 925 | 777 | 875 |
| 797 | 703 | 108 | 197 | 922 | 773 | 880 | 798 | 705 | 108 | 197 | 924 | 777 | 875 |
| 797 | 703 | 108 | 197 | 922 | 773 | 880 | 799 | 708 | 108 | 197 | 924 | 780 | 873 |
| 797 | 703 | 108 | 197 | 922 | 773 | 880 | 797 | 704 | 108 | 197 | 924 | 776 | 873 |
| 797 | 703 | 108 | 197 | 922 | 773 | 880 | 798 | 705 | 108 | 197 | 925 | 775 | 874 |
| 797 | 703 | 108 | 197 | 922 | 773 | 880 | 797 | 704 | 108 | 197 | 924 | 775 | 868 |
| 797 | 703 | 108 | 197 | 922 | 773 | 880 | 797 | 706 | 108 | 197 | 925 | 779 | 868 |
| 797 | 703 | 108 | 197 | 922 | 773 | 880 | 797 | 706 | 108 | 197 | 924 | 780 | 870 |
| 797 | 703 | 108 | 197 | 922 | 773 | 880 | 797 | 710 | 108 | 197 | 924 | 782 | 876 |
| 797 | 703 | 108 | 197 | 922 | 773 | 880 | 797 | 701 | 104 | 189 | 921 | 777 | 878 |
| 797 | 703 | 108 | 197 | 922 | 773 | 880 | 799 | 703 | 105 | 189 | 922 | 784 | 877 |
| 797 | 703 | 108 | 197 | 922 | 773 | 880 | 804 | 702 | 108 | 200 | 930 | 781 | 880 |
| 797 | 703 | 108 | 197 | 922 | 773 | 880 | 797 | 703 | 108 | 197 | 923 | 784 | 872 |
| 797 | 703 | 108 | 197 | 922 | 773 | 880 | 800 | 703 | 108 | 197 | 924 | 785 | 873 |
| 797 | 703 | 108 | 197 | 922 | 773 | 880 | 797 | 700 | 108 | 197 | 924 | 783 | 871 |
| 797 | 703 | 108 | 197 | 922 | 773 | 880 | 797 | 703 | 108 | 207 | 924 | 780 | 871 |
| 797 | 703 | 108 | 197 | 922 | 773 | 880 | 797 | 699 | 108 | 197 | 924 | 784 | 874 |
| 797 | 703 | 108 | 197 | 922 | 773 | 880 | 800 | 699 | 108 | 205 | 924 | 782 | 873 |
| 797 | 703 | 108 | 197 | 922 | 773 | 880 | 799 | 701 | 108 | 197 | 924 | 776 | 879 |
| 797 | 703 | 108 | 197 | 922 | 773 | 880 | 799 | 701 | 108 | 197 | 924 | 779 | 879 |
| 797 | 703 | 108 | 197 | 922 | 773 | 880 | 797 | 703 | 108 | 197 | 924 | 777 | 879 |
| 797 | 703 | 108 | 197 | 922 | 773 | 880 | 797 | 703 | 110 | 197 | 922 | 777 | 887 |

|     |     |     |     |     |     |     |     |     |     |     |     |     |     |
|-----|-----|-----|-----|-----|-----|-----|-----|-----|-----|-----|-----|-----|-----|
| 797 | 703 | 108 | 197 | 922 | 773 | 880 | 796 | 704 | 111 | 197 | 921 | 783 | 881 |
| 797 | 703 | 108 | 197 | 922 | 773 | 880 | 794 | 702 | 108 | 197 | 921 | 775 | 879 |
| 797 | 703 | 108 | 197 | 922 | 773 | 880 | 794 | 700 | 108 | 197 | 921 | 775 | 879 |
| 797 | 703 | 108 | 197 | 922 | 773 | 880 | 797 | 703 | 108 | 197 | 924 | 776 | 880 |
| 797 | 703 | 108 | 197 | 922 | 773 | 880 | 797 | 701 | 108 | 197 | 922 | 781 | 877 |
| 797 | 703 | 108 | 197 | 922 | 773 | 880 | 799 | 701 | 108 | 197 | 922 | 781 | 876 |
| 797 | 703 | 108 | 197 | 922 | 773 | 880 | 799 | 701 | 112 | 197 | 925 | 782 | 881 |
| 797 | 703 | 108 | 197 | 922 | 773 | 880 | 797 | 699 | 110 | 197 | 927 | 777 | 880 |
| 797 | 703 | 108 | 197 | 922 | 773 | 880 | 799 | 704 | 110 | 204 | 923 | 777 | 874 |
| 797 | 703 | 108 | 197 | 922 | 773 | 880 | 800 | 699 | 108 | 197 | 926 | 778 | 882 |
| 797 | 703 | 108 | 197 | 922 | 773 | 880 | 801 | 702 | 108 | 197 | 926 | 786 | 885 |
| 797 | 703 | 108 | 197 | 922 | 773 | 880 | 792 | 703 | 102 | 197 | 919 | 773 | 876 |
| 797 | 703 | 108 | 197 | 922 | 773 | 880 | 796 | 705 | 108 | 197 | 923 | 784 | 872 |
| 797 | 703 | 108 | 197 | 922 | 773 | 880 | 794 | 704 | 103 | 207 | 923 | 788 | 875 |
| 797 | 703 | 108 | 197 | 922 | 773 | 880 | 795 | 700 | 104 | 197 | 920 | 777 | 876 |
| 797 | 703 | 108 | 197 | 922 | 773 | 880 | 796 | 704 | 108 | 197 | 922 | 777 | 876 |
| 797 | 703 | 108 | 197 | 922 | 773 | 880 | 793 | 702 | 107 | 197 | 922 | 780 | 876 |
| 797 | 703 | 108 | 197 | 922 | 773 | 880 | 795 | 702 | 104 | 197 | 922 | 778 | 876 |
| 797 | 703 | 108 | 197 | 922 | 773 | 880 | 792 | 701 | 104 | 201 | 921 | 776 | 875 |
| 797 | 703 | 108 | 197 | 922 | 773 | 880 | 795 | 701 | 104 | 197 | 922 | 781 | 877 |
| 797 | 703 | 108 | 197 | 922 | 773 | 880 | 794 | 703 | 104 | 197 | 922 | 783 | 879 |
| 797 | 703 | 108 | 197 | 922 | 773 | 880 | 797 | 699 | 108 | 197 | 925 | 778 | 884 |
| 797 | 703 | 108 | 197 | 922 | 773 | 880 | 796 | 697 | 108 | 197 | 924 | 776 | 880 |
| 797 | 703 | 108 | 197 | 922 | 773 | 880 | 799 | 701 | 108 | 202 | 923 | 778 | 880 |
| 797 | 703 | 108 | 197 | 922 | 773 | 880 | 797 | 700 | 108 | 202 | 923 | 780 | 880 |
| 797 | 703 | 108 | 197 | 922 | 773 | 880 | 797 | 701 | 108 | 197 | 925 | 776 | 880 |
| 797 | 703 | 108 | 197 | 922 | 773 | 880 | 796 | 700 | 108 | 197 | 924 | 776 | 880 |
| 797 | 703 | 108 | 197 | 922 | 773 | 880 | 797 | 700 | 108 | 197 | 924 | 778 | 880 |
| 797 | 703 | 108 | 197 | 922 | 773 | 880 | 798 | 699 | 108 | 197 | 925 | 782 | 884 |
| 797 | 703 | 108 | 197 | 922 | 773 | 880 | 797 | 700 | 108 | 197 | 922 | 776 | 882 |
| 797 | 703 | 108 | 197 | 922 | 773 | 880 | 797 | 699 | 108 | 197 | 924 | 777 | 885 |
| 797 | 703 | 108 | 197 | 922 | 773 | 880 | 797 | 699 | 108 | 197 | 921 | 776 | 887 |
| 797 | 703 | 108 | 197 | 922 | 773 | 880 | 798 | 703 | 108 | 192 | 924 | 782 | 874 |
| 797 | 703 | 108 | 197 | 922 | 773 | 880 | 800 | 706 | 104 | 201 | 921 | 782 | 879 |
| 797 | 703 | 108 | 197 | 922 | 773 | 880 | 797 | 702 | 104 | 197 | 921 | 775 | 879 |
| 797 | 703 | 108 | 197 | 922 | 773 | 880 | 795 | 705 | 108 | 197 | 925 | 778 | 877 |
| 797 | 703 | 108 | 197 | 922 | 773 | 880 | 799 | 703 | 108 | 197 | 925 | 775 | 879 |
| 797 | 703 | 108 | 197 | 922 | 773 | 880 | 801 | 704 | 108 | 197 | 922 | 781 | 879 |
| 797 | 703 | 108 | 197 | 922 | 773 | 880 | 797 | 702 | 108 | 197 | 922 | 778 | 874 |
| 797 | 703 | 108 | 197 | 922 | 773 | 880 | 797 | 700 | 108 | 202 | 925 | 779 | 881 |

|     |     |     |     |     |     |     |     |     |     |     |     |     |     |
|-----|-----|-----|-----|-----|-----|-----|-----|-----|-----|-----|-----|-----|-----|
| 797 | 703 | 108 | 197 | 922 | 773 | 880 | 799 | 701 | 108 | 203 | 924 | 781 | 875 |
| 797 | 703 | 108 | 197 | 922 | 773 | 880 | 797 | 706 | 108 | 200 | 924 | 782 | 873 |
| 797 | 703 | 108 | 197 | 922 | 773 | 880 | 797 | 702 | 108 | 202 | 925 | 780 | 878 |
| 797 | 703 | 108 | 197 | 922 | 773 | 880 | 799 | 704 | 108 | 197 | 924 | 784 | 876 |
| 797 | 703 | 108 | 197 | 922 | 773 | 880 | 797 | 703 | 108 | 197 | 924 | 781 | 875 |
| 797 | 703 | 108 | 197 | 922 | 773 | 880 | 798 | 704 | 108 | 202 | 925 | 783 | 879 |
| 797 | 703 | 108 | 197 | 922 | 773 | 880 | 799 | 704 | 108 | 197 | 924 | 780 | 875 |
| 797 | 703 | 108 | 197 | 922 | 773 | 880 | 797 | 704 | 108 | 202 | 924 | 778 | 875 |
| 797 | 703 | 108 | 197 | 922 | 773 | 880 | 799 | 702 | 108 | 197 | 924 | 776 | 877 |
| 797 | 703 | 108 | 197 | 922 | 773 | 880 | 798 | 706 | 108 | 197 | 923 | 783 | 877 |
| 797 | 703 | 108 | 197 | 922 | 773 | 880 | 795 | 703 | 108 | 197 | 922 | 778 | 876 |
| 797 | 703 | 108 | 197 | 922 | 773 | 880 | 795 | 705 | 108 | 197 | 922 | 778 | 875 |
| 797 | 703 | 108 | 197 | 922 | 773 | 880 | 794 | 698 | 106 | 197 | 919 | 778 | 876 |
| 797 | 703 | 108 | 197 | 922 | 773 | 880 | 798 | 699 | 106 | 197 | 923 | 778 | 875 |
| 797 | 703 | 108 | 197 | 922 | 773 | 880 | 796 | 699 | 106 | 197 | 921 | 779 | 874 |
| 797 | 703 | 108 | 197 | 922 | 773 | 880 | 794 | 701 | 106 | 197 | 921 | 776 | 876 |
| 797 | 703 | 108 | 197 | 922 | 773 | 880 | 796 | 698 | 108 | 197 | 922 | 778 | 875 |
| 797 | 703 | 108 | 197 | 922 | 773 | 880 | 800 | 701 | 108 | 201 | 925 | 788 | 874 |
| 797 | 703 | 108 | 197 | 922 | 773 | 880 | 797 | 701 | 108 | 203 | 925 | 784 | 873 |
| 797 | 703 | 108 | 197 | 922 | 773 | 880 | 798 | 699 | 108 | 197 | 925 | 779 | 875 |
| 797 | 703 | 108 | 197 | 922 | 773 | 880 | 797 | 700 | 108 | 197 | 924 | 782 | 872 |
| 797 | 703 | 108 | 197 | 922 | 773 | 880 | 797 | 701 | 108 | 205 | 924 | 782 | 872 |
| 797 | 703 | 108 | 197 | 922 | 773 | 880 | 798 | 707 | 109 | 197 | 923 | 782 | 872 |
| 797 | 703 | 108 | 197 | 922 | 773 | 880 | 800 | 700 | 111 | 197 | 926 | 781 | 881 |
| 797 | 703 | 108 | 197 | 922 | 773 | 880 | 800 | 705 | 110 | 197 | 925 | 781 | 872 |
| 797 | 703 | 108 | 197 | 922 | 773 | 880 | 798 | 704 | 108 | 197 | 925 | 778 | 870 |
| 797 | 703 | 108 | 197 | 922 | 773 | 880 | 800 | 703 | 113 | 202 | 925 | 781 | 876 |
| 797 | 703 | 108 | 197 | 922 | 773 | 880 | 799 | 706 | 108 | 197 | 925 | 782 | 876 |
| 797 | 703 | 108 | 197 | 922 | 773 | 880 | 799 | 709 | 108 | 197 | 924 | 782 | 874 |
| 797 | 703 | 108 | 197 | 922 | 773 | 880 | 797 | 702 | 108 | 197 | 924 | 780 | 872 |
| 797 | 703 | 108 | 197 | 922 | 773 | 880 | 799 | 704 | 108 | 197 | 925 | 781 | 881 |
| 797 | 703 | 108 | 197 | 922 | 773 | 880 | 798 | 702 | 108 | 197 | 923 | 777 | 877 |
| 797 | 703 | 108 | 197 | 922 | 773 | 880 | 798 | 702 | 108 | 197 | 924 | 777 | 881 |
| 797 | 703 | 108 | 197 | 922 | 773 | 880 | 797 | 704 | 108 | 197 | 924 | 776 | 875 |
| 797 | 703 | 108 | 197 | 922 | 773 | 880 | 797 | 705 | 108 | 197 | 924 | 779 | 871 |
| 797 | 703 | 108 | 197 | 922 | 773 | 880 | 797 | 705 | 108 | 197 | 924 | 780 | 874 |
| 797 | 703 | 108 | 197 | 922 | 773 | 880 | 797 | 702 | 108 | 197 | 924 | 782 | 879 |
| 797 | 703 | 108 | 197 | 922 | 773 | 880 | 797 | 703 | 108 | 197 | 924 | 779 | 882 |
| 797 | 703 | 108 | 197 | 922 | 773 | 880 | 797 | 704 | 107 | 197 | 923 | 774 | 879 |
| 797 | 703 | 108 | 197 | 922 | 773 | 880 | 797 | 699 | 105 | 197 | 922 | 776 | 876 |



|     |     |     |     |     |     |     |     |     |     |     |     |     |     |
|-----|-----|-----|-----|-----|-----|-----|-----|-----|-----|-----|-----|-----|-----|
| 797 | 703 | 108 | 197 | 922 | 773 | 880 | 796 | 699 | 108 | 197 | 922 | 772 | 874 |
| 797 | 703 | 108 | 197 | 922 | 773 | 880 | 799 | 701 | 111 | 197 | 924 | 777 | 880 |
| 797 | 703 | 108 | 197 | 922 | 773 | 880 | 798 | 701 | 110 | 197 | 924 | 773 | 880 |
| 797 | 703 | 108 | 197 | 922 | 773 | 880 | 799 | 703 | 108 | 197 | 924 | 774 | 882 |
| 797 | 703 | 108 | 197 | 922 | 773 | 880 | 797 | 701 | 108 | 197 | 922 | 774 | 884 |
| 797 | 703 | 108 | 197 | 922 | 773 | 880 | 797 | 700 | 108 | 197 | 924 | 778 | 887 |
| 797 | 703 | 108 | 197 | 922 | 773 | 880 | 799 | 702 | 110 | 197 | 925 | 773 | 882 |
| 797 | 703 | 108 | 197 | 922 | 773 | 880 | 797 | 704 | 108 | 197 | 924 | 774 | 880 |
| 797 | 703 | 108 | 197 | 922 | 773 | 880 | 797 | 701 | 108 | 197 | 924 | 778 | 883 |
| 797 | 703 | 108 | 197 | 922 | 773 | 880 | 798 | 702 | 108 | 197 | 924 | 773 | 883 |
| 797 | 703 | 108 | 197 | 922 | 773 | 880 | 799 | 701 | 108 | 197 | 924 | 776 | 886 |
| 797 | 703 | 108 | 197 | 922 | 773 | 880 | 797 | 704 | 108 | 197 | 924 | 779 | 885 |
| 797 | 703 | 108 | 197 | 922 | 773 | 880 | 799 | 704 | 108 | 197 | 928 | 779 | 879 |
| 797 | 703 | 108 | 197 | 922 | 773 | 880 | 797 | 704 | 108 | 197 | 929 | 778 | 880 |
| 797 | 703 | 108 | 197 | 922 | 773 | 880 | 799 | 706 | 108 | 197 | 928 | 780 | 880 |
| 797 | 703 | 108 | 197 | 922 | 773 | 880 | 798 | 705 | 108 | 197 | 924 | 781 | 877 |
| 797 | 703 | 108 | 197 | 922 | 773 | 880 | 797 | 703 | 108 | 197 | 924 | 782 | 875 |
| 797 | 703 | 108 | 197 | 922 | 773 | 880 | 797 | 706 | 108 | 197 | 924 | 783 | 876 |
| 797 | 703 | 108 | 197 | 922 | 773 | 880 | 799 | 704 | 108 | 197 | 924 | 785 | 875 |
| 797 | 703 | 108 | 197 | 922 | 773 | 880 | 799 | 700 | 108 | 197 | 924 | 778 | 877 |
| 797 | 703 | 108 | 197 | 922 | 773 | 880 | 797 | 700 | 108 | 201 | 925 | 781 | 880 |
| 797 | 703 | 108 | 197 | 922 | 773 | 880 | 801 | 698 | 108 | 201 | 924 | 776 | 876 |
| 797 | 703 | 108 | 197 | 922 | 773 | 880 | 796 | 700 | 108 | 202 | 924 | 779 | 875 |
| 797 | 703 | 108 | 197 | 922 | 773 | 880 | 799 | 701 | 108 | 207 | 924 | 779 | 876 |
| 797 | 703 | 108 | 197 | 922 | 773 | 880 | 797 | 701 | 108 | 208 | 925 | 781 | 877 |
| 797 | 703 | 108 | 197 | 922 | 773 | 880 | 800 | 701 | 108 | 190 | 924 | 775 | 881 |
| 797 | 703 | 108 | 197 | 922 | 773 | 880 | 799 | 702 | 108 | 200 | 925 | 776 | 879 |
| 797 | 703 | 108 | 197 | 922 | 773 | 880 | 799 | 704 | 108 | 197 | 924 | 775 | 877 |
| 797 | 703 | 108 | 197 | 922 | 773 | 880 | 797 | 698 | 108 | 197 | 925 | 777 | 876 |
| 797 | 703 | 108 | 197 | 922 | 773 | 880 | 797 | 704 | 108 | 201 | 924 | 776 | 879 |
| 797 | 703 | 108 | 197 | 922 | 773 | 880 | 797 | 701 | 108 | 199 | 926 | 776 | 876 |
| 797 | 703 | 108 | 197 | 922 | 773 | 880 | 797 | 699 | 108 | 197 | 925 | 779 | 875 |
| 797 | 703 | 108 | 197 | 922 | 773 | 880 | 797 | 700 | 108 | 200 | 924 | 781 | 877 |
| 797 | 703 | 108 | 197 | 922 | 773 | 880 | 797 | 701 | 108 | 202 | 924 | 775 | 876 |
| 797 | 703 | 108 | 197 | 922 | 773 | 880 | 797 | 699 | 108 | 201 | 924 | 779 | 881 |
| 797 | 703 | 108 | 197 | 922 | 773 | 880 | 797 | 702 | 108 | 197 | 924 | 776 | 875 |
| 797 | 703 | 108 | 197 | 922 | 773 | 880 | 797 | 703 | 108 | 204 | 925 | 778 | 872 |
| 797 | 703 | 108 | 197 | 922 | 773 | 880 | 798 | 705 | 111 | 197 | 923 | 781 | 877 |
| 797 | 703 | 108 | 197 | 922 | 773 | 880 | 794 | 704 | 103 | 197 | 922 | 779 | 875 |
| 797 | 703 | 108 | 197 | 922 | 773 | 880 | 793 | 705 | 103 | 197 | 920 | 778 | 878 |

|     |     |     |     |     |     |     |     |     |     |     |     |     |     |
|-----|-----|-----|-----|-----|-----|-----|-----|-----|-----|-----|-----|-----|-----|
| 797 | 703 | 108 | 197 | 922 | 773 | 880 | 792 | 702 | 103 | 197 | 921 | 779 | 875 |
| 797 | 703 | 108 | 197 | 922 | 773 | 880 | 794 | 700 | 103 | 197 | 921 | 786 | 880 |
| 797 | 703 | 108 | 197 | 922 | 773 | 880 | 799 | 708 | 108 | 197 | 929 | 782 | 874 |
| 797 | 703 | 108 | 197 | 922 | 773 | 880 | 801 | 702 | 108 | 197 | 928 | 781 | 874 |
| 797 | 703 | 108 | 197 | 922 | 773 | 880 | 798 | 703 | 108 | 197 | 922 | 781 | 873 |
| 797 | 703 | 108 | 197 | 922 | 773 | 880 | 797 | 702 | 108 | 197 | 924 | 776 | 879 |
| 797 | 703 | 108 | 197 | 922 | 773 | 880 | 797 | 698 | 108 | 197 | 924 | 779 | 868 |
| 797 | 703 | 108 | 197 | 922 | 773 | 880 | 799 | 702 | 108 | 197 | 924 | 781 | 869 |
| 797 | 703 | 108 | 197 | 922 | 773 | 880 | 798 | 700 | 108 | 197 | 925 | 782 | 872 |
| 797 | 703 | 108 | 197 | 922 | 773 | 880 | 797 | 700 | 108 | 197 | 924 | 779 | 870 |
| 797 | 703 | 108 | 197 | 922 | 773 | 880 | 798 | 701 | 108 | 197 | 924 | 781 | 871 |
| 797 | 703 | 108 | 197 | 922 | 773 | 880 | 798 | 699 | 108 | 197 | 924 | 777 | 870 |
| 797 | 703 | 108 | 197 | 922 | 773 | 880 | 798 | 700 | 108 | 199 | 925 | 789 | 872 |
| 797 | 703 | 108 | 197 | 922 | 773 | 880 | 797 | 699 | 108 | 197 | 922 | 780 | 871 |
| 797 | 703 | 108 | 197 | 922 | 773 | 880 | 797 | 698 | 108 | 197 | 924 | 783 | 867 |
| 797 | 703 | 108 | 197 | 922 | 773 | 880 | 797 | 700 | 108 | 197 | 924 | 782 | 868 |
| 797 | 703 | 108 | 197 | 922 | 773 | 880 | 799 | 698 | 108 | 197 | 924 | 783 | 871 |
| 797 | 703 | 108 | 197 | 922 | 773 | 880 | 797 | 700 | 108 | 197 | 924 | 784 | 874 |
| 797 | 703 | 108 | 197 | 922 | 773 | 880 | 801 | 704 | 108 | 202 | 924 | 786 | 879 |
| 797 | 703 | 108 | 197 | 922 | 773 | 880 | 801 | 699 | 112 | 196 | 925 | 776 | 879 |
| 797 | 703 | 108 | 197 | 922 | 773 | 880 | 798 | 698 | 110 | 201 | 923 | 778 | 871 |
| 797 | 703 | 108 | 197 | 922 | 773 | 880 | 796 | 698 | 110 | 198 | 924 | 776 | 873 |
| 797 | 703 | 108 | 197 | 922 | 773 | 880 | 798 | 698 | 108 | 188 | 924 | 777 | 875 |
| 797 | 703 | 108 | 197 | 922 | 773 | 880 | 796 | 698 | 108 | 188 | 923 | 772 | 872 |
| 797 | 703 | 108 | 197 | 922 | 773 | 880 | 796 | 698 | 108 | 195 | 924 | 774 | 869 |
| 797 | 703 | 108 | 197 | 922 | 773 | 880 | 796 | 698 | 110 | 188 | 923 | 776 | 874 |
| 797 | 703 | 108 | 197 | 922 | 773 | 880 | 800 | 700 | 108 | 200 | 925 | 779 | 879 |
| 797 | 703 | 108 | 197 | 922 | 773 | 880 | 797 | 709 | 108 | 197 | 921 | 785 | 875 |
| 797 | 703 | 108 | 197 | 922 | 773 | 880 | 795 | 704 | 108 | 197 | 921 | 775 | 875 |
| 797 | 703 | 108 | 197 | 922 | 773 | 880 | 797 | 706 | 108 | 207 | 922 | 779 | 881 |
| 797 | 703 | 108 | 197 | 922 | 773 | 880 | 795 | 710 | 108 | 207 | 921 | 777 | 873 |
| 797 | 703 | 108 | 197 | 922 | 773 | 880 | 795 | 706 | 108 | 197 | 921 | 779 | 875 |
| 797 | 703 | 108 | 197 | 922 | 773 | 880 | 795 | 704 | 108 | 209 | 921 | 778 | 878 |
| 797 | 703 | 108 | 197 | 922 | 773 | 880 | 794 | 705 | 109 | 193 | 918 | 779 | 877 |
| 797 | 703 | 108 | 197 | 922 | 773 | 880 | 796 | 707 | 109 | 193 | 922 | 780 | 876 |
| 797 | 703 | 108 | 197 | 922 | 773 | 880 | 793 | 708 | 108 | 193 | 920 | 776 | 877 |
| 797 | 703 | 108 | 197 | 922 | 773 | 880 | 799 | 709 | 108 | 198 | 925 | 781 | 881 |
| 797 | 703 | 108 | 197 | 922 | 773 | 880 | 796 | 711 | 105 | 193 | 920 | 777 | 877 |
| 797 | 703 | 108 | 197 | 922 | 773 | 880 | 796 | 704 | 107 | 193 | 921 | 780 | 879 |
| 797 | 703 | 108 | 197 | 922 | 773 | 880 | 794 | 704 | 105 | 193 | 920 | 777 | 877 |

|     |     |     |     |     |     |     |     |     |     |     |     |     |     |
|-----|-----|-----|-----|-----|-----|-----|-----|-----|-----|-----|-----|-----|-----|
| 797 | 703 | 108 | 197 | 922 | 773 | 880 | 797 | 704 | 111 | 193 | 922 | 776 | 878 |
| 797 | 703 | 108 | 197 | 922 | 773 | 880 | 794 | 705 | 107 | 193 | 920 | 782 | 877 |
| 797 | 703 | 108 | 197 | 922 | 773 | 880 | 798 | 700 | 108 | 184 | 921 | 773 | 875 |
| 797 | 703 | 108 | 197 | 922 | 773 | 880 | 798 | 698 | 108 | 184 | 921 | 775 | 874 |
| 797 | 703 | 108 | 197 | 922 | 773 | 880 | 794 | 695 | 108 | 184 | 923 | 769 | 874 |
| 797 | 703 | 108 | 197 | 922 | 773 | 880 | 797 | 700 | 108 | 184 | 922 | 772 | 877 |
| 797 | 703 | 108 | 197 | 922 | 773 | 880 | 795 | 697 | 108 | 184 | 920 | 770 | 875 |
| 797 | 703 | 108 | 197 | 922 | 773 | 880 | 799 | 698 | 108 | 184 | 924 | 768 | 876 |
| 797 | 703 | 108 | 197 | 922 | 773 | 880 | 797 | 699 | 108 | 184 | 921 | 772 | 874 |
| 797 | 703 | 108 | 197 | 922 | 773 | 880 | 795 | 697 | 108 | 184 | 921 | 774 | 874 |
| 797 | 703 | 108 | 197 | 922 | 773 | 880 | 794 | 701 | 108 | 197 | 922 | 780 | 874 |
| 797 | 703 | 108 | 197 | 922 | 773 | 880 | 794 | 699 | 108 | 197 | 922 | 780 | 876 |
| 797 | 703 | 108 | 197 | 922 | 773 | 880 | 796 | 701 | 108 | 197 | 922 | 776 | 875 |
| 797 | 703 | 108 | 197 | 922 | 773 | 880 | 796 | 703 | 108 | 197 | 925 | 780 | 879 |
| 797 | 703 | 108 | 197 | 922 | 773 | 880 | 796 | 702 | 108 | 197 | 924 | 775 | 882 |
| 797 | 703 | 108 | 197 | 922 | 773 | 880 | 799 | 703 | 108 | 196 | 924 | 781 | 876 |
| 797 | 703 | 108 | 197 | 922 | 773 | 880 | 801 | 702 | 108 | 196 | 926 | 783 | 874 |
| 797 | 703 | 108 | 197 | 922 | 773 | 880 | 796 | 702 | 108 | 196 | 924 | 779 | 873 |
| 797 | 703 | 108 | 197 | 922 | 773 | 880 | 798 | 702 | 108 | 200 | 925 | 780 | 877 |
| 797 | 703 | 108 | 197 | 922 | 773 | 880 | 798 | 699 | 108 | 196 | 926 | 778 | 874 |
| 797 | 703 | 108 | 197 | 922 | 773 | 880 | 796 | 699 | 108 | 196 | 922 | 776 | 877 |
| 797 | 703 | 108 | 197 | 922 | 773 | 880 | 796 | 702 | 108 | 199 | 924 | 780 | 877 |
| 797 | 703 | 108 | 197 | 922 | 773 | 880 | 799 | 705 | 108 | 196 | 922 | 782 | 870 |
| 797 | 703 | 108 | 197 | 922 | 773 | 880 | 799 | 708 | 108 | 196 | 922 | 780 | 871 |
| 797 | 703 | 108 | 197 | 922 | 773 | 880 | 799 | 700 | 108 | 196 | 923 | 780 | 879 |
| 797 | 703 | 108 | 197 | 922 | 773 | 880 | 796 | 702 | 108 | 196 | 922 | 776 | 869 |
| 797 | 703 | 108 | 197 | 922 | 773 | 880 | 797 | 704 | 108 | 196 | 922 | 780 | 871 |
| 797 | 703 | 108 | 197 | 922 | 773 | 880 | 798 | 701 | 108 | 196 | 922 | 778 | 873 |
| 797 | 703 | 108 | 197 | 922 | 773 | 880 | 799 | 701 | 108 | 196 | 922 | 777 | 870 |
| 797 | 703 | 108 | 197 | 922 | 773 | 880 | 798 | 699 | 108 | 196 | 923 | 775 | 871 |
| 797 | 703 | 108 | 197 | 922 | 773 | 880 | 797 | 701 | 108 | 196 | 922 | 773 | 870 |
| 797 | 703 | 108 | 197 | 922 | 773 | 880 | 799 | 702 | 108 | 195 | 925 | 782 | 879 |

*p-value*

|         |       |       |       |       |       |       |
|---------|-------|-------|-------|-------|-------|-------|
| 9,94218 | 7,22E | 2,04E | 0,096 | 1,92E | 2,6E- | 1,66E |
| E-06    | -09   | -05   | 348   | -47   | 107   | -52   |

*Table S11. List of stabilizing mutations for the PDB: 2LZM collected from ProTherm.*

Available at <<https://www.iitm.ac.in/bioinfo/ProTherm>>.

| <b>PDB_WILD</b> | <b>MUTATION</b> |
|-----------------|-----------------|
| 2LZM            | I3L             |
| 2LZM            | D20T            |
| 2LZM            | I3L             |
| 2LZM            | I3L             |
| 2LZM            | A82P            |
| 2LZM            | I3L             |
| 2LZM            | D20S            |
| 2LZM            | S38D            |
| 2LZM            | N116D           |
| 2LZM            | E22K            |
| 2LZM            | T26S            |
| 2LZM            | A82P            |
| 2LZM            | E45A            |
| 2LZM            | G113A           |
| 2LZM            | G113A           |
| 2LZM            | A82P            |
| 2LZM            | A93P            |
| 2LZM            | K16E            |
| 2LZM            | G113A           |
| 2LZM            | A82P            |
| 2LZM            | A41V            |
| 2LZM            | S44A            |
| 2LZM            | N40D            |
| 2LZM            | N40A            |
| 2LZM            | S44A            |
| 2LZM            | A41V            |
| 2LZM            | A41V            |
| 2LZM            | N144D           |
| 2LZM            | G77A            |
| 2LZM            | I3L             |
| 2LZM            | N144D           |
| 2LZM            | T151S           |
| 2LZM            | V131A           |
| 2LZM            | S44L            |
| 2LZM            | F153L           |
| 2LZM            | S44A            |
| 2LZM            | N116D           |
| 2LZM            | V131A           |
| 2LZM            | S44M            |

|      |       |
|------|-------|
| 2LZM | N40A  |
| 2LZM | S44I  |
| 2LZM | G113E |
| 2LZM | A82P  |
| 2LZM | C54T  |
| 2LZM | T157R |
| 2LZM | A41V  |
| 2LZM | F153L |
| 2LZM | V131A |
| 2LZM | A41D  |
| 2LZM | V131A |
| 2LZM | S44Q  |
| 2LZM | V131A |
| 2LZM | S44R  |
| 2LZM | S38D  |
| 2LZM | R154E |
| 2LZM | S44K  |
| 2LZM | V131E |
| 2LZM | F153L |
| 2LZM | S44Y  |
| 2LZM | N116A |
| 2LZM | E128A |
| 2LZM | V131I |
| 2LZM | V131A |
| 2LZM | V131M |
| 2LZM | K147E |
| 2LZM | G30A  |
| 2LZM | E11H  |
| 2LZM | S44V  |
| 2LZM | V131L |
| 2LZM | V131D |
| 2LZM | A93T  |
| 2LZM | S44F  |
| 2LZM | S44W  |
| 2LZM | S44H  |
| 2LZM | A93P  |
| 2LZM | E45A  |
| 2LZM | S44T  |
| 2LZM | I3L   |

## References

- Dehouck, Y. *et al.* (2011) PoPMuSiC 2.1: a web server for the estimation of protein stability changes upon mutation and sequence optimality. *BMC Bioinformatics*, **12**, 151.
- Hazes, B. and Dijkstra, B.W. (1988) Model building of disulfide bonds in proteins with known three-dimensional structure. *Protein Eng.*, **2**, 119–125.
- Huang, L.-T. *et al.* (2007) iPTREE-STAB: interpretable decision tree based method for predicting protein stability changes upon mutations. *Bioinformatics*, **23**, 1292–1293.
- Jubb, H.C. *et al.* (2017) Arpeggio: A Web Server for Calculating and Visualising Interatomic Interactions in Protein Structures. *J. Mol. Biol.*, **429**, 365–371.
- Laimer, J. *et al.* (2015) MAESTRO--multi agent stability prediction upon point mutations. *BMC Bioinformatics*, **16**, 116.
- Mariano, D. *et al.* (2019) A Computational Method to Propose Mutations in Enzymes Based on Structural Signature Variation (SSV). *Int J Mol Sci*, **20**.
- Pandurangan, A.P. *et al.* (2017) SDM: a server for predicting effects of mutations on protein stability. *Nucleic Acids Res*, **45**, W229–W235.
- Pires, D.E.V. *et al.* (2014a) DUET: a server for predicting effects of mutations on protein stability using an integrated computational approach. *Nucleic Acids Res.*, **42**, W314–319.
- Pires, D.E.V. *et al.* (2014b) mCSM: predicting the effects of mutations in proteins using graph-based signatures. *Bioinformatics*, **30**, 335–342.
- Sowdhamini, R. *et al.* (1989) Stereochemical modeling of disulfide bridges. Criteria for introduction into proteins by site-directed mutagenesis. *Protein Eng.*, **3**, 95–103.
- Teng, S. *et al.* (2010) Sequence feature-based prediction of protein stability changes upon amino acid substitutions. *BMC Genomics*, **11**, S5.
